# Supplementary material for: Randomised controlled trial into the role of ramipril in fibrosis reduction in rheumatic heart disease: the RamiRHeD trial protocol
Source: PubMed Central journal article supplement — BMJ Open. 2021 Sep 13;11(9):e048016. doi: 10.1136/bmjopen-2020-048016 (PMC8438922; doi:10.1136/bmjopen-2020-048016), 2021-09-13
Supplement: bmjopen-2020-048016.draft_revisions.pdf [file bmjopen-2020-048016.draft_revisions.pdf]

# BMJ Open

BMJ Open is committed to open peer review. As part of this commitment we make the peer review history of every article we publish publicly available.

When an article is published we post the peer reviewers' comments and the authors' responses online. We also post the versions of the paper that were used during peer review. These are the versions that the peer review comments apply to.

The versions of the paper that follow are the versions that were submitted during the peer review process. They are not the versions of record or the final published versions. They should not be cited or distributed as the published version of this manuscript.

BMJ Open is an open access journal and the full, final, typeset and author-corrected version of record of the manuscript is available on our site with no access controls, subscription charges or pay-per-view fees (<http://bmjopen.bmj.com>).

If you have any questions on BMJ Open's open peer review process please email [info.bmjopen@bmj.com](mailto:info.bmjopen@bmj.com)

# BMJ Open

## Randomised Controlled Trial into the role of ramipril in fibrosis reduction in RHD: The RamiRHeD trial protocol

|                               |                                                                                                                                                                                                                                                                                                                                                                                                                                                                                                                                                                                                                                                                                                                                                                                                                                                                                                                                                                                                                                                                                                                                                                                                                                                                                                                                                                                                                                                                                                                                    |
|-------------------------------|------------------------------------------------------------------------------------------------------------------------------------------------------------------------------------------------------------------------------------------------------------------------------------------------------------------------------------------------------------------------------------------------------------------------------------------------------------------------------------------------------------------------------------------------------------------------------------------------------------------------------------------------------------------------------------------------------------------------------------------------------------------------------------------------------------------------------------------------------------------------------------------------------------------------------------------------------------------------------------------------------------------------------------------------------------------------------------------------------------------------------------------------------------------------------------------------------------------------------------------------------------------------------------------------------------------------------------------------------------------------------------------------------------------------------------------------------------------------------------------------------------------------------------|
| Journal:                      | <i>BMJ Open</i>                                                                                                                                                                                                                                                                                                                                                                                                                                                                                                                                                                                                                                                                                                                                                                                                                                                                                                                                                                                                                                                                                                                                                                                                                                                                                                                                                                                                                                                                                                                    |
| Manuscript ID                 | bmjopen-2020-048016                                                                                                                                                                                                                                                                                                                                                                                                                                                                                                                                                                                                                                                                                                                                                                                                                                                                                                                                                                                                                                                                                                                                                                                                                                                                                                                                                                                                                                                                                                                |
| Article Type:                 | Protocol                                                                                                                                                                                                                                                                                                                                                                                                                                                                                                                                                                                                                                                                                                                                                                                                                                                                                                                                                                                                                                                                                                                                                                                                                                                                                                                                                                                                                                                                                                                           |
| Date Submitted by the Author: | 17-Dec-2020                                                                                                                                                                                                                                                                                                                                                                                                                                                                                                                                                                                                                                                                                                                                                                                                                                                                                                                                                                                                                                                                                                                                                                                                                                                                                                                                                                                                                                                                                                                        |
| Complete List of Authors:     | <p>Ambari, Ade; RS Jantung Dan Pembuluh Darah Harapan Kita, Cardiology and Vascular Medicine; University of Indonesia Faculty of Medicine, Cardiology and vascular medicine</p> <p>Setianto, Budhi ; RS Jantung Dan Pembuluh Darah Harapan Kita, Cardiology and Vascular Medicine; University of Indonesia Faculty of Medicine, Cardiology and vascular medicine</p> <p>Santoso, Anwar; RS Jantung Dan Pembuluh Darah Harapan Kita, Cardiology and Vascular Medicine; University of Indonesia Faculty of Medicine, Cardiology and vascular medicine</p> <p>Radi, Basuni; RS Jantung Dan Pembuluh Darah Harapan Kita, Cardiology and Vascular Medicine; University of Indonesia Faculty of Medicine, Cardiology and vascular medicine</p> <p>Dwiputra, Bambang; RS Jantung Dan Pembuluh Darah Harapan Kita, Cardiology and Vascular Medicine; University of Indonesia Faculty of Medicine, Cardiology and vascular medicine</p> <p>Susilowati, Eliana; RS Jantung Dan Pembuluh Darah Harapan Kita, Research assistant of preventive and rehabilitative cardiovascular</p> <p>Tulrahmi, Fadilla; RS Jantung Dan Pembuluh Darah Harapan Kita, Research assistant of preventive and rehabilitative cardiovascular</p> <p>Wind, Annemiek; University Medical Centre Utrecht Department of Cardiology, cardiology</p> <p>cramer, maarten jan; University Medical Centre Utrecht Department of Cardiology, cardiology</p> <p>Dovendans, Pieter; University Medical Centre Utrecht Department of Cardiology; Central Military Hospital</p> |
| Keywords:                     | CARDIOLOGY, Valvular heart disease < CARDIOLOGY, Cardiothoracic surgery < SURGERY                                                                                                                                                                                                                                                                                                                                                                                                                                                                                                                                                                                                                                                                                                                                                                                                                                                                                                                                                                                                                                                                                                                                                                                                                                                                                                                                                                                                                                                  |
|                               |                                                                                                                                                                                                                                                                                                                                                                                                                                                                                                                                                                                                                                                                                                                                                                                                                                                                                                                                                                                                                                                                                                                                                                                                                                                                                                                                                                                                                                                                                                                                    |

SCHOLARONE™  
Manuscripts

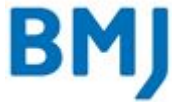

I, the Submitting Author has the right to grant and does grant on behalf of all authors of the Work (as defined in the below author licence), an exclusive licence and/or a non-exclusive licence for contributions from authors who are: i) UK Crown employees; ii) where BMJ has agreed a CC-BY licence shall apply, and/or iii) in accordance with the terms applicable for US Federal Government officers or employees acting as part of their official duties; on a worldwide, perpetual, irrevocable, royalty-free basis to BMJ Publishing Group Ltd ("BMJ") its licensees and where the relevant Journal is co-owned by BMJ to the co-owners of the Journal, to publish the Work in this journal and any other BMJ products and to exploit all rights, as set out in our [licence](#).

The Submitting Author accepts and understands that any supply made under these terms is made by BMJ to the Submitting Author unless you are acting as an employee on behalf of your employer or a postgraduate student of an affiliated institution which is paying any applicable article publishing charge ("APC") for Open Access articles. Where the Submitting Author wishes to make the Work available on an Open Access basis (and intends to pay the relevant APC), the terms of reuse of such Open Access shall be governed by a Creative Commons licence – details of these licences and which [Creative Commons](#) licence will apply to this Work are set out in our licence referred to above.

Other than as permitted in any relevant BMJ Author's Self Archiving Policies, I confirm this Work has not been accepted for publication elsewhere, is not being considered for publication elsewhere and does not duplicate material already published. I confirm all authors consent to publication of this Work and authorise the granting of this licence.

## Randomised Controlled Trial into the role of ramipril in fibrosis reduction in RHD: The RamiRHeD trial protocol

Ade. M. Ambari<sup>1,2</sup>, Budhi Setianto<sup>1,2</sup>, Anwar Santoso<sup>1,2</sup>, Basuni Radi<sup>1,2</sup>, Bambang Dwiputra<sup>1,2</sup>, Eliana Susilowati<sup>3</sup>, Fadilla Tulrahmi<sup>3</sup>, Annemiek Wind<sup>4</sup>, Maarten J.Cramer<sup>4</sup>, Pieter Doevendans<sup>4,5</sup>

<sup>1</sup>Departement of Cardiology and vascular medicine, RS Jantung dan pembuluh darah Harapan Kita, Indonesia

<sup>2</sup>Department of Cardiology and Vascular Medicine Faculty of Medicine University of Indonesia,

<sup>3</sup>Research Assistants of Preventive Cardiology, National Cardiovascular Center Harapan Kita

<sup>4</sup>Department of Cardiology, University Medical Center Utrecht, the Netherlands

<sup>5</sup>Central Military Hospital; Netherlands Heart Institute.

Corresponding uthor: Ade. M. Ambari (dr\_ade\_meidian@yahoo.co.id)

### ABSTRACT

**Introduction** Rheumatic heart disease (RHD) is a major burden in developing countries home to 80% of all people living with the disease where it causes most of the cardiovascular morbidity and mortality in children and young adults. Chronic inflammation and fibrosis of heart valve tissue due to chronic inflammation in RHD will cause calcification and thickening of the impacted heart valves, especially the mitral valve. This fibrogenesis is enhanced by the production of Angiotensin II by increasing TGF- $\beta$  expression and latter, the binding of IL-33 which is known to have anti-hypertrophic and anti-fibrotic effects to sST2. Its binding to the non-natural ligand of sST2 will worsen the fibrosis. Therefore, we hypothesized that Angiotensin-converting enzyme inhibitor (ACEI) will improve rheumatic mitral valve stenosis.

**Methods and analysis** This is a single-centre, double-blind, placebo-controlled, pre-post test design, randomised clinical trial. Patients with mitral stenosis valvular dysfunction due to rheumatic disease planned for cardiac valve replacement operation will be given Ramipril 5 mg or placebo for a minimum of 12 weeks before the surgery. Expression of ST2 in the mitral valve is considered to be representative for cardiac fibrosis. Mitral valve tissue will be stained using the immunohistochemistry method using ST2. While plasma ST2 will be measured by ELISA. This study is conducted in the Department of Cardiology and Vascular Medicine, Universitas Indonesia, National Cardiac Center Harapan Kita Hospital, Jakarta, Indonesia from June 27th, 2019.

Ethical Approval and Dissemination Ethics of this study has been approved by the ethical committee of National Cardiovascular Center Harapan Kita with ethical code: LB.02.01/VII/286/KEP.009/2018. This study has been registered in clinicaltrials.gov with identifier code of NCT03991910.

### Stregths and limitations of the study

- This study is the first study that analysed the valve fibrosis using immunohistochemistry of ST2 in rheumatic mitral stenosis patients.
- This study proposed novel treatment targeting the valve fibrosis reduction in rheumatic mitral stenosis patients.
- This research will help low-to-middle income countries to economically treat rheumatic mitral stenosis patients by attenuating the progression of mitral valve fibrosis.
- The limitation of this study is that the mitral valve surgery schedule can be variable and not fix (could be sooner or later than the expected date) so the time of ramipril or placebo consumptions could be differ for each patients.
- No standard control of the non-fibrotic valve, because all patients have rheumatic mitral stenosis and the mitral valves only could be obtained during the mitral valve surgery, but

1  
2  
3 plasma ST2 concentration and the echocardiographic parameters could help to define the  
4 severity of the valve fibrosis before treatments.

- 5 - Patients recruitments takes time longer than usual due to COVID-19 pandemic.  
6  
7

## 8 INTRODUCTION

9 Rheumatic heart disease (RHD) is a major burden in developing countries, home to  
10 80% of all people living with the disease where it causes most of the cardiovascular  
11 morbidity and mortality in children and young adults. More than 15.6 million people globally  
12 suffer from RHD, and 233.000 die prematurely of the disease every year. According to the  
13 2010 Global Burden of Disease Study, the number of disability-adjusted life years lost to  
14 RHD was as high as 10.1 million per year worldwide.[1] In Indonesia, the rate of rheumatic  
15 heart disease with mitral valve stenosis was about 94 cases each year.[2] Diagnosis and  
16 treatment during the advanced stage of the disease are very costly and challenging especially  
17 in the developing countries. Early diagnosis and prompt treatment of the RHD population can  
18 be of great help for the targeted treatment of the disease.[3] Rheumatic mitral valve stenosis  
19 is the main presentation of RHD that leads to significant morbidity and mortality. Mitral  
20 stenosis usually develops as a result of persistent or recurrent valvulitis with bicommissural  
21 fusion.[4] fibrogenesis are stimulated and activated by various stimuli such as cytokines,  
22 connective tissue growth factors, and activators. Previous studies suggest that RHD is an  
23 autoimmune disease that is associated with cytokine activation.[4] Inflammatory cytokines  
24 are key regulators of immune processes. Chronic inflammation causes damage to the  
25 valvular tissue. Many studies investigated the potential biomarkers to evaluate fibrosis and  
26 chronic inflammation process in RHD patients, and ST2 is one of the sensitive marker for  
27 detecting cardiac fibrosis, including the fibrosis process in RHD [4–6]

28 ST2 is a member of the interleukin (IL)-1 receptor family discovered in a classical  
29 translational science fashion and exists in two forms, a transmembrane receptor (ST2L) as  
30 well as a soluble decoy receptor (sST2).[7] A member of the interleukin (IL)-1 receptor  
31 family, ST2 is a biomarker of mechanical stress, up-regulated in isolated cardiomyocytes  
32 exposed to mechanical strain; derangement of ST2 signalling leads to a phenotype consistent  
33 with myocardial remodelling and in patients with heart failure, sST2 levels strongly correlate  
34 with the severity of heart failure, independently forecasting risk additive to NT-proBNP and  
35 other biomarkers. Both sST2 and ST2L are induced in cardiomyocytes and fibroblasts  
36 exposed to biomechanical stress. Biomechanical stress and fibrosis will enhance the valve  
37 thickening in RHD.[8] Clarifying the understanding of the role played by ST2 in  
38 cardiovascular disease, IL-33 has been shown to have anti-hypertrophic and anti-fibrotic  
39 effects in the heart, transduced by ST2L.[7] Calcification and thickening of the mitral valves  
40 were enhanced by the production of Angiotensin II. Angiotensin II induce the upregulation of  
41 Transforming growth factor  $\beta$  (TGF- $\beta$ ) and latter the binding of IL-33 to sST2 and not to the  
42 natural ligand (ST2L). Binding of IL-33 to sST2 will cause fibrogenesis evenmore. Thus,  
43 ACEI are hypothesized to attenuate this vicious cycle through the inhibition of Angiotensin II  
44 and consequently increase Bradykinin that furtherly inhibit fibrosis through the negative  
45 regulation of angiotensin II activity in Mitogen Activator Protein Kinase (MAPK) pathways  
46 through the suppression of the Ca<sup>2+</sup> response and the Na<sup>+</sup> transport.[9,10]

47 ACEI are often used in preventing and treating heart failure due to regurgitant valve  
48 disease. The majority of patients with symptomatic RHD have significant mitral stenosis  
49 (MS) and are denied ACEI therapy, because of the fear of hypotension in the presence of  
50 fixed obstruction.[11] ACEI are first-line therapy in heart failure, and their symptomatic and  
51 survival benefits extend beyond afterload reduction. Reduction in fibrosis and anti-  
52 proliferative and neurohumoral effects contribute to the ACEI effect that is not reproduced by  
53 pure vasodilators. ACEI was well tolerated in symptomatic RHD associated with significant  
54  
55  
56  
57  
58  
59  
60

1  
2  
3 mitral stenosis and preserved left the ventricular systolic function.[11] Current guidelines for  
4 valvular intervention do not include ACEI as therapy in rheumatic mitral stenosis patients.  
5 The only established therapeutic options for rheumatic mitral stenosis were balloon mitral  
6 valvuloplasty and mitral valve surgery. More economical therapeutic option that targeted the  
7 inhibition of fibrogenesis and improve the mitral valve fibrosis is needed especially in low to  
8 middle income countries. Valvular anti-inflammatory and anti-fibrosis medical therapy to  
9 suppress the progression of the disease is needed in rheumatic mitral stenosis patients. ACEI  
10 (Enalapril) was well tolerated in symptomatic RHD associated with significant aortic and/or  
11 mitral stenosis and preserved left ventricular systolic function.[11]

12  
13  
14 To date, there is no treatment of rheumatic mitral stenosis that focus on the main  
15 pathogenesis, the valvular fibrosis. For this reason, new strategies and therapies are needed to  
16 prevent the progression of RHD.[4] Neutralizing inflammatory cytokines or antagonizing  
17 their receptor function has been considered as a useful therapeutic strategy to treat  
18 autoimmune diseases.[4] In this respect, new therapies targeting ST 2 and their receptors as  
19 studied in some autoimmune diseases may promise a new approach for patients with RHD.  
20 ACE inhibitors are agents with anti-fibrotic effects. This study therefore aims to investigate  
21 the effect of the ACE inhibitor Ramipril in suppressing the expression of ST2 in the cardiac  
22 mitral valve in patients with RHD (Figure 1).  
23  
24  
25  
26  
27

## 28 **METHODS AND ANALYSIS**

### 29 **Study Designs**

30  
31 This is a single-centre, double-blind, placebo-controlled, pre-post test design, randomised  
32 clinical trial. Patients with mitral stenosis valvular dysfunction due to rheumatic process  
33 planned for cardiac valve replacement will be treated with Ramipril 5 mg or placebo for  
34 minimum 12 weeks (3 months) before the surgery. ST2 will be checked as fibrosis marker  
35 (Figure 2). This is conducted and still recruiting, in the National Cardiac Center Harapan Kita  
36 Hospital, Jakarta, Indonesia from June 27th, 2019.  
37  
38  
39  
40

### 41 **Study Population**

42 Patients with rheumatic mitral valve stenosis (RMS) who undergo cardiac valve replacement  
43 operation in National Cardiovascular Center Harapan Kita (NCCHK), Jakarta, Indonesia will  
44 be screened for eligibility criteria of this study. Inclusion criteria of this study are: patients  
45 with RMS or combined valve disease aged more than 18 years who undergo cardiac valve  
46 repair or replacement operation with or without tricuspid valve repair. Patients with systolic  
47 blood pressure (SBP)  $\geq 100$  mmHg and diastolic blood pressure (DBP)  $\geq 60$  mmHg.  
48 Exclusion criteria of this study are: Patients with congenital heart disease, patients with non  
49 mitral valve surgery, patients with coronary artery bypass surgery and patients who refuse to  
50 provide informed consent. Further exclusion criteria are adults aged 65 years or over,  
51 pregnant women, and patients with autoimmune disease, patients with persistent hypotension  
52 (SBP  $< 100$  mm Hg), severe aortic stenosis (aortic valve orifice  $< 0.75$  cm<sup>2</sup>), chronic renal  
53 dysfunction with serum creatinine  $> 2.5$  mg/ dL, or known ACEI intolerance. Participants  
54 who meet the criteria and are willing to join the RamiRHeD trial will be informed in detail  
55 about the study participation and will be required to sign the informed consent.  
56  
57  
58  
59  
60



## Outcomes

The primary outcomes of this study are the ST2 expression in mitral valve tissue and the secondary outcomes are: soluble plasma ST2, clinical signs and symptoms, and the other echocardiography and laboratory test results.

## Sample Size and Randomisation

This is a pioneer study for analysing effects of Ramipril 5 mg toward ST2 expression in mitral valve tissue in human. Previous study that use ST2 human tissue is a study from Marzullo et al in 2016[12] that use carotid tissue from carotid endarterectomy, with sample size of 41 consecutive patients. Because our study will use human tissue sample, we approached the sample size calculation using multistage non-finite population method, using this specified precision estimation formula[13]:  $N = (Z\delta)/E$ , with  $N$ = sample size;  $Z_{0.95} = 1.96$ ;  $\delta N(0,1) = 1$ ; and  $E = 0.05$  for 0.95 confidence interval. So we calculate the sample and found that  $1.65(1)/0.05 = 33$  samples.

According to the sample size of the previous study that analyse ST in human tissue and a sample size formula that commonly used in in-vivo study, we decide to use a sample size of 30 for each arm, and with the addition of drop out rate of 10%, become total of 66 for 2 arms. The number includes a 10% dropout and withdrawal in each group. Randomisation will be done in an equal ratio of Ramipril to placebo. An online, web-based sequence generator system will be used. It will be linked with codes for placebo and treatment tablets provided by the manufacturer contracted to produce the trial medication. Researchers and participants will be blinded. After randomisation, the treatment pack and capsule are identical between both groups will contain either active tablets or placebo. The principal investigator will have no access to the randomisation list.

## Research technique

Mitral valve surgery (MVS) is performed with Mitral Valve Replacement. The echocardiography established the diagnosis of Rheumatic Mitral Valve Disease. Rheumatic valve disease was diagnosed with World Heart Federation Criteria (2012) for RHD[14]. The reference measurement for valve area is a planimetry by two-dimensional echocardiography. Doppler technique assessed for the mean mitral gradient. The degree of mitral regurgitation was evaluated according to Seller's classification on left ventriculography in a 30° right anterior oblique view. In cases of missing data, substitution measurements will be used as previously described: Doppler half time pressure for valve area and colour Doppler for mitral regurgitation.[14]

Patients will be diagnosed with experienced cardiologists, surgery decision based on the decision of a multidisciplinary team, echocardiography will be performed by the cardiologist who is specialized in echocardiography. Blood samples will be drawn by the experienced nurses in pathology clinic laboratory, ST2 plasma and tissue will be collected with the biomedical analysts, interview of study participants will be done by the trained assessors. Study instruments involve questionnaires, laboratory tests, echocardiography, and biochemical tests. Study instruments will use same technique, same tools, same brands, and same place for data collection of each study participant.

## Intervention

Daily administration of capsules containing Ramipril 5 mg or placebo orally will be provided for study's participants. Participants will remain under the care of the cardiologist treating team. Routine medications of each patient will be continued. Capsules containing Ramipril 5 mg or placebo will be given for a minimum of 3 months before the operation schedule.

## Withdrawal and Drop out

Participants will be informed that they are able to withdraw from the study at any time and will sign a reference as proof. They will be informed that this will not affect their clinical care. Basic clinical data and samples already collected will be included in the analyses in accord with the consent obtained at trial entry. Drop out criteria will be participants who are lost to follow up, participants with severe adverse events, mortality due to any cause.

## Sample Collection and Measurements

Clinical signs and symptoms will be documented before and after the study. Blood samples will be collected twice: before the intervention and a day before the mitral valve surgery. The routine blood sample includes haemoglobin, platelet count, leucocyte count, erythrocyte sedimentation rate (ESR), C-Reactive Protein (CRP). Total cholesterol, random blood glucose, HbA1C, urea, creatinine, serum electrolytes, NTproBNP, plasma ST2 will be determined. Echocardiography before the intervention and before surgery will be performed. Mitral valve tissue expression of ST2 will be measured using the immunohistochemistry method. Plasma ST2 will be measured using Enzyme Link Immunoabsorbent Assay (ELISA) kit for human ST2/IL33R antibody with catalogue number DST200 from R&D. This assay employs the quantitative sandwich enzyme immunoassay technique. A monoclonal antibody specific for human ST2 has been pre-coated onto a microplate. Standards and samples are pipetted into the wells and any ST2 present is bound by the immobilized antibody. After washing away any unbound substances, an enzyme-linked polyclonal antibody specific for human ST2 is added to the wells. Following a wash to remove any unbound antibody-enzyme reagent, a substrate solution is added to the wells and colour develops in proportion to the amount of ST2 bound in the initial step. The colour development is stopped and the intensity of the colour is measured.

Mitral valve tissue will be collected during mitral valve replacement surgery and will be saved in a sterile container filled with formalin 10%. Mitral valves tissue will be stained using immunohistochemistry (IHC) method to assess ST2 expression. Chemical fixation uses cross-linking chemicals such as paraformaldehyde and glutaraldehyde to preserve the cellular structure. Once the tissue is harvested, the fixation begins. Following the fixation, a tissue block is made by placing the sample in hot parafilm, placed into a mould, allowed to cool and harden, and thin tissue sections can then be made. De-cloaking methods include heat and pressure treatment, enzyme digest, and microwaving. Following the de-cloaking, the parafilm on the slides is removed by baking, and the IHC staining process can begin. The source of the primary antibody that will be used is from the monoclonal type of ST2 antibody. The secondary antibody will be conjugated by biotin. Blocking buffer will include BSA. The chromogen that will be used is 3,3'-Diaminobenzidine (DAB). An oxidized-DAB that is



1  
2  
3 catalysed with Horseradish peroxidase (HRP) then will form a brown precipitate, so the ST2  
4 expression can be visualised using light microscope. The tissue will then be counterstained  
5 using hematoxylin-Eosin staining, so the non-ST2-expressing-cells can be visualised in  
6 bluish colour A negative control will use Hematoxylin-eosin staining only. Measurements of  
7 cells which express ST2 will be done under the microscope. Date, tissue type, antibody  
8 dilution, tissue treatment, and magnification of the microscope will be documented. Cells  
9 which express ST2 will be counted by more than one professionals.  
10  
11  
12

### 13 **Statistical Analysis**

14 Continuous variables are expressed as mean±SD and categorical variables as percentages.  
15 The  $\chi^2$  test will be used to see the relationship between dichotomous variables and the  
16 Student t-test for continuous variables. Single variable correlation analysis and multivariable  
17 linear regression analysis will be performed. A P value <0.05 was considered statistically  
18 significant. The analyses were performed with the use of SPSS for Windows.  
19  
20  
21  
22

### 23 **Ethics and Dissemination**

24 Ethics of this study has been approved by the ethical committee of National Cardiovascular  
25 Center Harapan Kita (NCCHK), Jakarta, Indonesia, with ethical code:  
26 LB.02.01/VII/286/KEP.009/2018. This study has been registered in clinicaltrials.gov with  
27 identifier code of NCT03991910.  
28  
29  
30  
31

### 32 **DISCUSSION**

33 This study is planning to recruiting rheumatic mitral valve patients to be randomised for  
34 getting capsules either containing Ramipril 5 mg or placebo. Rheumatic mitral stenosis is the  
35 main presentation of RHD that leads to significant morbidity and mortality. Mitral stenosis  
36 usually develops as a result of persistent or recurrent valvulitis with bicommissural fusion.  
37 Previous studies suggest that RHD is an autoimmune disease that is associated with cytokine  
38 activities. Inflammatory cytokines are key regulators of immune processes.[4] Immunologic  
39 reaction caused by the autoreactive antibody continuously caused the chronic inflammation  
40 and valvular fibrosis, which can be detected by the increase of sST2 as the emerging  
41 biomarker for cardiac fibrosis.[10,15,16]  
42  
43  
44

45 ST2 binds IL-33. It is a pro-inflammatory IL-1 family cytokine with intracellular and  
46 extracellular activities. IL-33 is expressed in smooth muscle and airway epithelia.[17] ST2 is  
47 upregulated by inflammatory stimulation of some cells, such as: keratinocytes, and dermal  
48 fibroblasts and by mechanical strain in cardiac fibroblasts.[17,18] The soluble ST2 isoform is  
49 elevated in the serum under inflammatory conditions such as allergic asthma, sepsis, trauma,  
50 dengue fever, and pulmonary disease.[19–22] Serum ST2 elevation is also associated with  
51 multiple aspects of heart failure including aortic stenosis, congestive cardiomyopathy, and  
52 risk of heart failure and death.[23–27] In this study, plasma ST2 is considered as the  
53 inflammatory and fibrosis biomarker for the rheumatic mitral stenosis patients. Because  
54 plasma ST2 also can increase in various conditions unrelated to cardiac fibrosis, this study  
55 also measures the ST2 expression in mitral valve tissue. Plasma ST2 describes the amount of  
56  
57  
58  
59  
60

1  
2  
3 ST2 in the circulation, whereas mitral valve cells which express ST2 describe the ST2 that  
4 bind to the domain receptor.  
5

6 ACEI are commonly administered as the treatment of heart failure due to valvular  
7 regurgitation. Its use in MS is still debatable because of its hypotensive effect. A prior study  
8 assessing the safety of ACEI in MS patients showed that ACEI (specifically Enalapril in that  
9 study) was well tolerated and safe for until dose of 10 mg bid.[11] ACEI is presumed to  
10 have vasodilatory effect in obstructive lesions, It will decrease systemic vascular resistance  
11 through arterial vasodilatation, thus will increase the transvalvular gradient. Its anti-  
12 remodelling effect is also well established and its long term use also has been proven to  
13 improve Left Ventricular Ejection Fraction (LVEF) in patients with systolic dysfunction.[28]  
14 Because the prior study[11] demonstrated the efficacy and the potential benefits of ACEI on  
15 improving outcomes in MS patients, this study wants to reconfirm and investigate the  
16 possible pathomechanism of those improvements. This study will assess the effect of  
17 Ramipril 5 mg as the cardiac antifibrosis treatment in severe MS RHD patients. Their plasma  
18 ST2 concentration will be measured and compared. Plasma ST2 concentration also will be  
19 compared before and after several months of consuming Ramipril 5 mg. There will be no  
20 healthy control for this study because of the ethical limitation in the acquisition of mitral  
21 valve tissue. Mitral valve tissue will be acquired during the mitral valve surgery. Expression  
22 of ST2 in mitral valve tissue will then be calculated semi-quantitatively and compared with  
23 the plasma ST2 results. It is hypothesized that Ramipril will suppress the expression of ST2 in  
24 the cardiac mitral valve in patients with RHD.  
25  
26  
27  
28  
29

30  
31 Beside plasma ST2 and ST2 expression in mitral valve tissue, this study also compares  
32 the pre-post effects of Ramipril 5 mg versus placebo to the NT-proBNP concentrations  
33 echocardiography strain parameters, and also clinical outcomes. Clinical signs and symptoms  
34 and echocardiography parameters were evaluated in some studies of mitral valve stenosis,  
35 and showed that they were positively correlated with the NT-proBNP concentration.[29,30]  
36 This study will also compare the NT-proBNP concentration of patients receiving Ramipril  
37 and placebo. NT-proBNP concentrations also can be correlated with the ST2 concentration  
38 and expression.  
39  
40  
41  
42

### 43 **Authors contributions**

44 Conception and design of the work was initiated by AMA, BS, AS, BR, and BD. AMA, BD,  
45 ES, FT contributed to the acquisition, analysis, and interpretation of data for the work.  
46 Manuscript was drafted by AMA, BD, and ES. AMA, PD, AW, and MJC critically revised  
47 the manuscript. Author and co-authors gave final approval and agree to be accountable for all  
48 aspects of work, ensuring integrity and accuracy.  
49  
50

### 51 **Funding**

52 This research received no specific grant from any funding agency in the public, commercial  
53 or not-for-profit sectors.  
54  
55

### 56 **Competing interests statement**

The authors declare that the research was conducted in the absence of any commercial or financial relationships that could be construed as a potential conflict of interest.

## REFERENCES

- 1 Rodriguez-Fernandez R, Amiya R, Wyber R, *et al.* Rheumatic heart disease among adults in a mining community of Papua, Indonesia: findings from an occupational cohort. *Heart Asia* 2015;**7**:1 LP – 5. doi:10.1136/heartasia-2015-010641
- 2 Ambari AM, Setianto B, Santoso A, *et al.* Survival analysis of patients with rheumatic MS after PBMV compared with MVS in a low-to-middle-income country. *Neth Heart J* 2019;**27**:559–64. doi:10.1007/s12471-019-01315-x
- 3 Sharma N, Toor D. Interleukin-10: Role in increasing susceptibility and pathogenesis of rheumatic fever/rheumatic heart disease. *Cytokine* 2017;**90**:169–76. doi:https://doi.org/10.1016/j.cyto.2016.11.010
- 4 Bilik MZ, Kaplan İ, Polat N, *et al.* Serum Levels of IL-17 and IL-23 in Patients With Rheumatic Mitral Stenosis. *Medicine (Baltimore)* 2016;**95**:e3562–e3562. doi:10.1097/MD.0000000000003562
- 5 Ramona J, von M, Martin F, *et al.* Soluble ST2 - A Potential Biomarker of Rheumatic Heart Disease. *Clin Med Rev Case Reports* 2019;**6**. doi:10.23937/2378-3656/1410255
- 6 Gardezi SKM, Coffey S, Prendergast BD, *et al.* Serum biomarkers in valvular heart disease. *Heart* 2018;**104**:349 LP – 358. doi:10.1136/heartjnl-2016-310482
- 7 L Januzzi J. ST2 as a Cardiovascular Risk Biomarker: From the Bench to the Bedside. *J Cardiovasc Transl Res* 2013;**6**. doi:10.1007/s12265-013-9459-y
- 8 Ayoub S, Ferrari G, Gorman RC, *et al.* Heart Valve Biomechanics and Underlying Mechanobiology. *Compr Physiol* 2016;**6**:1743–80. doi:10.1002/cphy.c150048
- 9 Hus-Citharel A, Bouby N, Iturrioz X, *et al.* Multiple Cross Talk between Angiotensin II, Bradykinin, and Insulin Signaling in the Cortical Thick Ascending Limb of Rat Kidney. *Endocrinology* 2010;**151**:3181–94. doi:10.1210/en.2009-1237
- 10 Ambari AM, Setianto B, Santoso A, *et al.* Angiotensin Converting Enzyme Inhibitors (ACEIs) Decrease the Progression of Cardiac Fibrosis in Rheumatic Heart Disease Through the Inhibition of IL-33/sST2. *Front Cardiovasc Med* 2020;**7**:115. doi:10.3389/fcvm.2020.00115
- 11 Chockalingam A, Sangareddi V, Dorairajan S, *et al.* Safety and Efficacy of Enalapril in Multivalvular Heart Disease with Significant Mitral Stenosis—SCOPE-MS. *Angiology* 2005;**56**:151–8. doi:10.1177/000331970505600205
- 12 Marzullo A, Ambrosi F, Inchingolo M, *et al.* ST2L transmembrane receptor expression: An immunochemical study on endarterectomy samples. *PLoS One* 2016;**11**:1–12. doi:10.1371/journal.pone.0156315
- 13 Louangrath PI. Sample Size Determination for Non-Finite Population. *SSRN Electron J* 2017;**1**:1–12. doi:10.2139/ssrn.2710455
- 14 Reményi B, Wilson N, Steer A, *et al.* World Heart Federation criteria for echocardiographic diagnosis of rheumatic heart disease—an evidence-based guideline. *Nat Rev Cardiol* 2012;**9**:297–309. doi:10.1038/nrcardio.2012.7
- 15 Kakkar R, Lee RT. The IL-33/ST2 pathway: therapeutic target and novel biomarker. *Nat Rev Drug Discov* 2008;**7**:827–40. doi:10.1038/nrd2660
- 16 Miller AM. Role of IL-33 in inflammation and disease. *J Inflamm (Lond)* 2011;**8**:22. doi:10.1186/1476-9255-8-22
- 17 Schmitz J, Owyang A, Oldham E, *et al.* IL-33, an Interleukin-1-like Cytokine that Signals via the IL-1 Receptor-Related Protein ST2 and Induces T Helper Type 2-

- 1  
2  
3 Associated Cytokines. *Immunity* 2005;**23**:479–90.  
4 doi:https://doi.org/10.1016/j.immuni.2005.09.015
- 5  
6 18 Sanada S, Hakuno D, Higgins L, *et al.* IL-33 and ST2 Comprise a Critical  
7 Biomechanically Induced and Cardioprotective Signaling System. *J Clin Invest*  
8 2007;**117**:1538–49. doi:10.1172/JCI30634
- 9  
10 19 Hayakawa H, Hayakawa M, Kume A, *et al.* Soluble ST2 Blocks Interleukin-33  
11 Signaling in Allergic Airway Inflammation. *J Biol Chem* 2007;**282**:26369–80.  
12 doi:10.1074/jbc.M704916200
- 13  
14 20 Martinez-Rumayor A, Camargo C, M Green S, *et al.* Soluble ST2 Plasma  
15 Concentrations Predict 1-Year Mortality in Acutely Dyspneic Emergency Department  
16 Patients With Pulmonary Disease. *Am J Clin Pathol* 2008;**130**:578–84.  
17 doi:10.1309/WMG2BFRC97MKKQKP
- 18  
19 21 Becerra A, Warke R, Xhaja K, *et al.* Increased activity of indoleamine 2,3-  
20 dioxygenase in serum from acutely infected dengue patients linked to gamma  
21 interferon antiviral function. *J Gen Virol* 2009;**90**:810–7. doi:10.1099/vir.0.004416-0
- 22  
23 22 Brunner M, Krenn C, Roth G, *et al.* Increased levels of soluble ST2 protein and IgG1  
24 production in patients with sepsis and trauma. *Intensive Care Med* 2004;**30**:1468–73.  
25 doi:10.1007/s00134-004-2184-x
- 26  
27 23 Bartunek J, Delrue L, Van Durme F, *et al.* Nonmyocardial Production of ST2 Protein  
28 in Human Hypertrophy and Failure Is Related to Diastolic Load. *J Am Coll Cardiol*  
29 2008;**52**:2166–74. doi:https://doi.org/10.1016/j.jacc.2008.09.027
- 30  
31 24 Szerafin T, Niederpold T, Mangold A, *et al.* Secretion of Soluble ST2-Possible  
32 Explanation for Systemic Immunosuppression after Heart Surgery. *Thorac Cardiovasc*  
33 *Surg* 2009;**57**:25–9. doi:10.1055/s-2008-1039044
- 34  
35 25 S Sabatine M, A Morrow D, Higgins L, *et al.* Complementary Roles for Biomarkers of  
36 Biomechanical Strain ST2 and N-Terminal Prohormone B-Type Natriuretic Peptide in  
37 Patients With ST-Elevation Myocardial Infarction. *Circulation* 2008;**117**:1936–44.  
38 doi:10.1161/CIRCULATIONAHA.107.728022
- 39  
40 26 Mueller T, Dieplinger B, Alfons G, *et al.* Increased Plasma Concentrations of Soluble  
41 ST2 are Predictive for 1-Year Mortality in Patients with Acute Destabilized Heart  
42 Failure. *Clin Chem* 2008;**54**:752–6. doi:10.1373/clinchem.2007.096560
- 43  
44 27 Shimp M, A Morrow D, O Weinberg E, *et al.* Serum Levels of the Interleukin-1  
45 Receptor Family Member ST2 Predict Mortality and Clinical Outcome in Acute  
46 Myocardial Infarction. *Circulation* 2004;**109**:2186–90.  
47 doi:10.1161/01.CIR.0000127958.21003.5A
- 48  
49 28 Jao G, Lystash J, Sane D. Angiotensin-Converting Enzyme Inhibitors Can Increase the  
50 Transvalvular Gradient Among Patients With Aortic Stenosis. *J Am Coll Cardiol*  
51 2012;**59**:777. doi:10.1016/j.jacc.2011.10.892
- 52  
53 29 Arat-Özkan M.D A, Yiğit M.D Z, Ökçün M.D B, *et al.* Serum N-Terminal pro-BNP  
54 Levels Correlate with Symptoms and Echocardiographic Findings in Patients with  
55 Mitral Stenosis. *Echocardiography* 2005;**22**:473–8. doi:10.1111/j.1540-  
56 8175.2005.04085.x
- 57  
58 30 İltumur K, Karabulut A, Yokus B, *et al.* N-terminal proBNP plasma levels correlate  
59 with severity of mitral stenosis. *J Heart Valve Dis* 2005;**14**:735–41.  
60

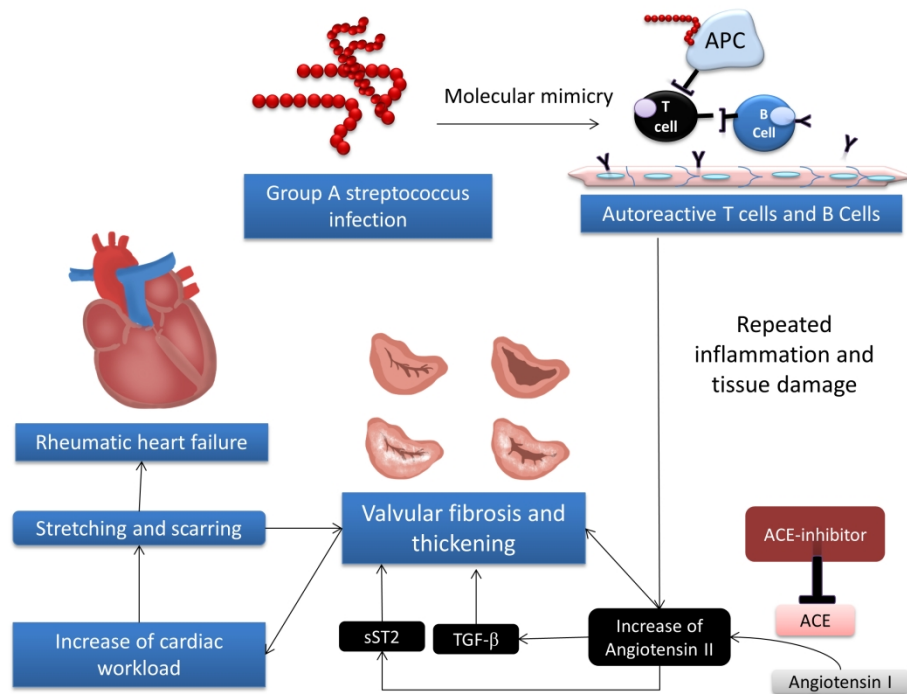

Figure 1 Hypothesis

Molecular mimicry is a defense mechanism of group A streptococcus to avoid immune cells. This mechanism allows immune cells to generate autoimmunity against protein the lining of endothelial cells and causing chronic inflammation and valvular damage. Continuous process of chronic inflammation leads to valvular thickening and fibrosis, which is mediated by the Angiotensin II. Angiotensin II increase TGF- $\beta$  expression and cause IL-33 to bind with sST2, and subsequently cause damage and fibrosis to the valvular tissue evenmore, which later will ended with rheumatic heart failure. ACEI is hypothesized to counteract these processes by decreasing Angiotensin I conversion from Angiotensin I.

1  
2  
3  
4  
5  
6  
7  
8  
9  
10  
11  
12  
13  
14  
15  
16  
17  
18  
19  
20  
21  
22  
23  
24  
25  
26  
27  
28  
29  
30  
31  
32  
33  
34  
35  
36  
37  
38  
39  
40  
41  
42  
43  
44  
45  
46  
47  
48  
49  
50  
51  
52  
53  
54  
55  
56  
57  
58  
59  
60

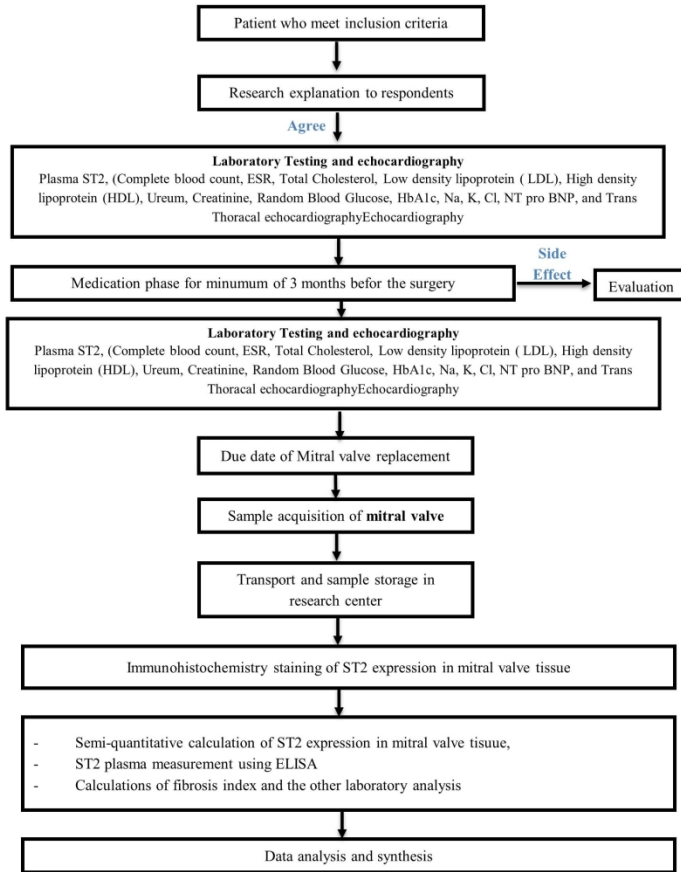

**Figure 2. Research Flow-chart**

Figure 2. Research Flow-chart

190x274mm (284 x 284 DPI)



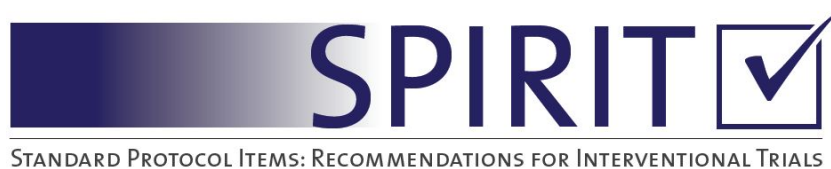

SPIRIT 2013 Checklist: Recommended items to address in a clinical trial protocol and related documents\*

| Section/item                      | Item No | Description                                                                                                                                                                                                                     |
|-----------------------------------|---------|---------------------------------------------------------------------------------------------------------------------------------------------------------------------------------------------------------------------------------|
| <b>Administrative information</b> |         |                                                                                                                                                                                                                                 |
| Title                             | 1       | Descriptive title identifying the study design, population, interventions, and, if applicable, trial acronym<br>Randomised Controlled Trial into the role of ramipril in fibrosis reduction in RHD: The RamiRHeD trial protocol |
| Trial registration                | 2a      | Trial identifier and registry name. If not yet registered, name of intended registry<br>Clinicaltrials.gov NCT03991910                                                                                                          |

2b All items from the World Health Organization Trial Registration Data Set

|                          |                                                                                                                                              |
|--------------------------|----------------------------------------------------------------------------------------------------------------------------------------------|
| Register                 | ClinicalTrials.gov                                                                                                                           |
| Main ID                  | NCT03991910                                                                                                                                  |
| Protocol ID              | RamiRHeD                                                                                                                                     |
| Date of Registration     | 19/06/2019                                                                                                                                   |
| Prospective Registration | Yes                                                                                                                                          |
| Primary sponsor          | Harapan Kita National Cardiovascular Center/Indonesia University                                                                             |
| Public title             | The Effect of Ramipril in Suppressing ST2 Expression in Rheumatic Mitral Stenosis Patients                                                   |
| Scientific title         | The Effect of Ramipril in Suppressing Gene Expression of Fibrosis in Cardiac Mitral Stenosis in Patients With Rheumatic Heart Disease        |
| Date of first enrolment  | June 27, 2019                                                                                                                                |
| Target sample size       | 66                                                                                                                                           |
| Recruitment status       | Recruiting                                                                                                                                   |
| Study type               | Randomised clinical trial                                                                                                                    |
| Study design             | Allocation: Randomized. Intervention model: Parallel Assignment. Primary purpose: Treatment. Masking: Double (Participant, Investigator).    |
| Phase                    | Phase 3                                                                                                                                      |
| Countries of Recruitment | Indonesia                                                                                                                                    |
| Health condition         | ACE inhibitor<br>Fibrosis; heart<br>Mitral stenosis<br>Rheumatic heart disease<br>Rheumatic mitral stenosis                                  |
| Intervention (s)         | Drug: placebos<br>Drug: Ramipril 5 mg oral capsule                                                                                           |
| Primary outcome          | ST2 expression in mitral valve tissue                                                                                                        |
| Secondary outcome        | ST2 plasma level<br>NT-proBNP concentration (pg/ml)<br>Ejection fraction<br>TAPSE (tricuspid annular plane systolic excursion)<br>NYHA class |

Protocol version 3 Date and version identifier  
Released: 19-06-2019

Funding 4 Sources and types of financial, material, and other support  
No specific fundings outside our institution (Harapan Kita National Cardiovascular Center, Indonesia)

1  
2  
3  
4  
5  
6  
7  
8  
9  
10  
11  
12  
13  
14  
15  
16  
17  
18  
19  
20  
21  
22  
23  
24  
25  
26  
27  
28  
29  
30  
31  
32  
33  
34  
35  
36  
37  
38  
39  
40  
41  
42  
43  
44  
45  
46  
47  
48  
49  
50  
51  
52  
53  
54  
55  
56  
57  
58  
59  
60

**Roles and responsibilities**

- 5a Names, affiliations, and roles of protocol contributors**  
Ade M. Ambari • Budhi Setianto • Anwar Santoso • Basuni Radi • Bambang Dwiputra  
Department of Cardiology and Vascular Medicine Faculty of Medicine University of Indonesia, National Cardiovascular Center Harapan Kita, Jakarta, Indonesia
- Eliana Susilowati • Fadilla Tulrahmi  
Research Assistant Division of Preventive and Rehabilitative Cardiology, National Cardiovascular Centre Harapan Kita, Jakarta, Indonesia
- Maarten .J.M. Cramer • P.A. Doevendans • Annemiek Wind  
Department of Cardiology, University Medical Center Utrecht, Utrecht, The Netherlands
- Role:** Ade M. Ambari conceived the study. Ade M. Ambari, Pieter A. Doevendans, Maarten .J.M. Cramer, Budhi Setianto, Anwar Santoso, Basuni Radi, Bambang Dwiputra initiated the study design and conceptual framework. Ade M. Ambari, Bambang Dwiputra contribute in patients' recruitment and assessment, writing and editing. Eliana Susilowati contribute to the biomedical methods, sample collection, writing and editing. Fadilla Tulrahmi conducting the primary statistical analysis, randomisation, and sample size calculation. Ade M. Ambari, Pieter A. Doevendans, Maarten .J.M. Cramer, Annemiek Wind contribute to writing, protocol editing, language editing. All authors contributed to refinement of the study protocol and approved the final manuscript.
- 5b Name and contact information for the trial sponsor**  
Trial sponsor: Harapan Kita National Cardiovascular Center, Jakarta  
Contact name: Ade Meidian Ambari  
Address: S Parman Street number 87, Special Region of Jakarta, Indonesia  
Telephone: 0215681111  
Email: dr\_ade\_meidian@yahoo.co.id
- 5c Role of study sponsor and funders, if any, in study design; collection, management, analysis, and interpretation of data; writing of the report; and the decision to submit the report for publication, including whether they will have ultimate authority over any of these activities**  
This research received no specific grant from any funding agency in the public, commercial or not-for-profit sectors.
- 5d Composition, roles, and responsibilities of the coordinating centre, steering committee, endpoint adjudication committee, data management team, and other individuals or groups overseeing the trial, if applicable (see Item 21a for data monitoring committee)**

**Introduction****Principal Investigators**

Design and conduct of RCTRDMS  
Preparation of protocol and revisions  
Organising steering committee meetings  
Publication of study reports  
Members of TMC [*Trial Management Committee*]

**Steering committee (SC)**

Agreement of final protocol  
All lead investigators will be steering committee members  
Reviewing progress of study and if necessary agreeing changes to the protocol and/or investigators brochure to facilitate the smooth running of the study.

**Trial Management Committee (TMC)**

(Principle [*sic*] investigator, Research Physician, Administrator)

Study planning  
Organisation of steering committee meetings  
Provide annual risk report to ethics committee  
report serious adverse events (SAE) to medical committee and ethics committee  
Responsible for trial master file  
Budget administration and contractual issues with individual centres  
Advice for lead investigators  
Audit of 6 monthly feedback forms and decide when site visit to occur.  
Assistance with international review, board/independent ethics committee applications  
Data verification  
Randomisation  
Organisation of central serum sample collection

**Data Manager**

Maintenance of trial IT system and data entry  
Data verification

## Background and rationale

6a

Description of research question and justification for undertaking the trial, including summary of relevant studies (published and unpublished) examining benefits and harms for each intervention

Rheumatic heart disease (RHD) is a major burden in developing countries home to 80% of all people living with the disease where it causes most of the cardiovascular morbidity and mortality in children and young adults. Chronic inflammation and fibrosis of heart valve tissue due to chronic inflammation in RHD will cause calcification and thickening of the impacted heart valves, especially the mitral valve. This fibrogenesis is enhanced by the production of Angiotensin II by increasing TGF- $\beta$  expression and latter, the binding of IL-33 which is known to have anti-hyperthropic and anti-fibrotic effects to sST2. Its binding to the non-natural ligand of sST2 will worsen the fibrosis. Therefore, we hypothesized that Angiotensin-converting enzyme inhibitor (ACEI) will improve rheumatic mitral valve stenosis.

Existing knowledge: Angiotensin-converting enzyme inhibitors (ACEI) are first-line therapy in cardiac failure, and their symptomatic and survival benefits extend beyond afterload reduction. Reduction in fibrosis and anti-proliferative and neurohumoral effects contribute to the ACEI effect that is not reproduced by pure vasodilators. ACEI was well tolerated in symptomatic RHD associated with significant mitral stenosis and preserved left the ventricular systolic function. New therapies targeting ST 2 and their receptors as studied in some autoimmune diseases may promise a new approach for patients with RHD. We are assessing the effect of Ramipril in suppressing fibrotic protein expression in mitral valve (measured with ST2 expression) of patients with RHD in the National Cardiac Center Harapan Kita hospital Jakarta Indonesia.

Dose selection: Prevoious study (SCOPE trial) showed that ACEI (Enalapril) was well tolerated in symptomatic RHD associated with significant aortic and/or mitral stenosis and preserved left ventricular systolic function until dose of 10 mg bid. This study use Ramipril 5 mg as it is more commonly used in Indonesia.

Need for a trial: Current guidelines for valvular intervention do not include ACEI as therapy in rheumatic mitral stenosis patients. In developing countries, percutaneous balloon mitral valvuloplasty and mitral valve surgery are the therapeutic options for rheumatic mitral stenosis. Both of these treatments involve enormous expenses; it is the public health cost burden for developing countries. Valvular anti-inflammatory and anti-fibrosis medical therapy to suppress the progression of the disease is needed in rheumatic mitral stenosis patients.

|    |              |    |                                                                                  |
|----|--------------|----|----------------------------------------------------------------------------------|
| 1  |              |    |                                                                                  |
| 2  |              | 6b | Explanation for choice of comparators                                            |
| 3  |              |    | Current guidelines for valvular intervention do not include ACEI as therapy      |
| 4  |              |    | in rheumatic mitral stenosis patients. This study is divided in 2 arms. The      |
| 5  |              |    | first arm will be given Ramipril 5 mg as the intervention, while the second      |
| 6  |              |    | arm, will be given placebo as the comparator. The other individualized           |
| 7  |              |    | treatments for rheumatic valvular disease was still given in both arms as        |
| 8  |              |    | indicated.                                                                       |
| 9  |              |    |                                                                                  |
| 10 |              |    |                                                                                  |
| 11 | Objectives   | 7  | Specific objectives or hypotheses                                                |
| 12 |              |    | The investigators hypothesized that administration of Ramipril 5 mg for 3        |
| 13 |              |    | months will reduce expression of ST2 as fibrosis biomarkers, in the cardiac      |
| 14 |              |    | mitral valve of patients with Rheumatic Heart Disease with mitral stenosis.      |
| 15 |              |    |                                                                                  |
| 16 |              |    |                                                                                  |
| 17 | Trial design | 8  | Description of trial design including type of trial (eg, parallel group,         |
| 18 |              |    | crossover, factorial, single group), allocation ratio, and framework (eg,        |
| 19 |              |    | superiority, equivalence, noninferiority, exploratory)                           |
| 20 |              |    | This is a single-centre, double-blind, placebo-controlled, pre-post test design, |
| 21 |              |    | randomised clinical trial. Patients with mitral stenosis valvular dysfunction    |
| 22 |              |    | due to rheumatic process planned for cardiac valve replacement were given        |
| 23 |              |    | Ramipril 5 mg or placebo for minimum 12 weeks before the surgery. ST2            |
| 24 |              |    | was checked as fibrosis marker. This study will be conducted in the              |
| 25 |              |    | Department of Cardiology and Vascular Medicine, University Indonesia,            |
| 26 |              |    | National Cardiac Center Harapan Kita Hospital, Jakarta, Indonesia from           |
| 27 |              |    | June, 27th 2019.                                                                 |
| 28 |              |    |                                                                                  |
| 29 |              |    |                                                                                  |
| 30 |              |    |                                                                                  |
| 31 |              |    |                                                                                  |

### Methods: Participants, interventions, and outcomes

|    |                      |    |                                                                               |
|----|----------------------|----|-------------------------------------------------------------------------------|
| 32 |                      |    |                                                                               |
| 33 |                      |    |                                                                               |
| 34 | Study setting        | 9  | Description of study settings (eg, community clinic, academic hospital)       |
| 35 |                      |    | and list of countries where data will be collected. Reference to where        |
| 36 |                      |    | list of study sites can be obtained                                           |
| 37 |                      |    | Study setting: in a national academic hospital. Patients come from various    |
| 38 |                      |    | regions in one country (Indonesia).                                           |
| 39 |                      |    |                                                                               |
| 40 |                      |    |                                                                               |
| 41 | Eligibility criteria | 10 | Inclusion and exclusion criteria for participants. If applicable, eligibility |
| 42 |                      |    | criteria for study centres and individuals who will perform the               |
| 43 |                      |    | interventions (eg, surgeons, psychotherapists)                                |
| 44 |                      |    | • Inclusion criteria of this study are: Patients with mitral valve stenosis   |
| 45 |                      |    | or a combination                                                              |
| 46 |                      |    | • aged more than 18 years                                                     |
| 47 |                      |    | • undergo cardiac valve replacement operation with or without a               |
| 48 |                      |    | tricuspid valve repair,                                                       |
| 49 |                      |    | • patients with systolic blood pressure (SBP) $\geq$ 100 mmHg and             |
| 50 |                      |    | diastolic blood pressure (DBP) $\geq$ 60 mmHg                                 |
| 51 |                      |    | • passed in medication phase without side effect minimum 4 weeks              |
| 52 |                      |    | until operation schedule                                                      |
| 53 |                      |    |                                                                               |
| 54 |                      |    |                                                                               |
| 55 |                      |    |                                                                               |
| 56 |                      |    |                                                                               |
| 57 |                      |    |                                                                               |
| 58 |                      |    |                                                                               |
| 59 |                      |    |                                                                               |
| 60 |                      |    |                                                                               |



## Interventions

11a Interventions for each group with sufficient detail to allow replication, including how and when they will be administered

## Arms and Interventions

| Arms                                                                    | Interventions                                                                                                                                                                                       |
|-------------------------------------------------------------------------|-----------------------------------------------------------------------------------------------------------------------------------------------------------------------------------------------------|
| Placebo Comparator: control<br>control patients will be given a placebo | Drug: Placebos<br>the control group will be given placebo inside a capsule, so study participant won't be able to know the drug and doses inside the capsule (for masking)                          |
| Experimental: treatment<br>Ramipril 5 mg treatment group                | Drug: Ramipril 5Mg Oral Capsule<br>the treatment group will be given Ramipril 5 mg inside a capsule, so study participant won't be able to know the drug and doses inside the capsule (for masking) |

11b Criteria for discontinuing or modifying allocated interventions for a given trial participant (eg, drug dose change in response to harms, participant request, or improving/worsening disease)  
Participants will be informed that they are able to withdraw from the study at any time and will sign a reference as proof. They will be informed that this will not affect their clinical care. Basic clinical data and samples already collected will be included in the analyses in accord with the consent obtained at trial entry. Drop out criteria will be Participants who are lost to follow up, participants with severe adverse events, mortality due to any cause.

11c Strategies to improve adherence to intervention protocols, and any procedures for monitoring adherence (eg, drug tablet return, laboratory tests)  
Patients' adherence will be monitored with the drug return. Patients will be contacted via phone number to be reminded for routine administration. Patients are provided with the investigator contact if needed something to ask or to report adverse events or side effects (if any). Patients will be asked to visit the hospital where this study is enrolled to meet the investigator monthly. Each month, capsule return will be counted and patient will also be evaluated for the symptoms and vital signs.

11d Relevant concomitant care and interventions that are permitted or prohibited during the trial  
Rescue medication: stop the drug. Patient will be admitted to hospital and undergone treatments according to the adverse effects.  
Prohibited concomitant medication: Angiotensin receptor blocker.

- 1  
2  
3  
4  
5  
6  
7  
8  
9  
10  
11  
12  
13  
14  
15  
16  
17  
18  
19  
20  
21  
22  
23  
24  
25  
26  
27  
28  
29  
30  
31  
32  
33  
34  
35  
36  
37  
38  
39  
40  
41  
42  
43  
44  
45  
46  
47  
48  
49  
50  
51  
52  
53  
54  
55  
56  
57  
58  
59  
60
- Outcomes 12 Primary, secondary, and other outcomes, including the specific measurement variable (eg, systolic blood pressure), analysis metric (eg, change from baseline, final value, time to event), method of aggregation (eg, median, proportion), and time point for each outcome. Explanation of the clinical relevance of chosen efficacy and harm outcomes is strongly recommended
- Primary Outcome Measures :
- ST2 plasma level  
plasma level of ST2 measured by ELISA
- Secondary Outcome Measures :
- ST2 expression in mitral valve tissue  
expression of ST2 in mitral valve tissue, using immunohistochemistry method
  - NT-proBNP concentration (pg/ml)  
concentration of NT-proBNP, plasma markers for cardiac dysfunction.
  - ejection fraction  
echocardiography parameter
  - TAPSE (tricuspid annular plane systolic excursion)  
echocardiography parameter to assess right ventricular function
  - NYHA class  
related symptoms will be graded in class I to IV according to NYHA.

Participant  
timeline

13 Time schedule of enrolment, interventions (including any run-ins and washouts), assessments, and visits for participants. A schematic diagram is highly recommended (see Figure)

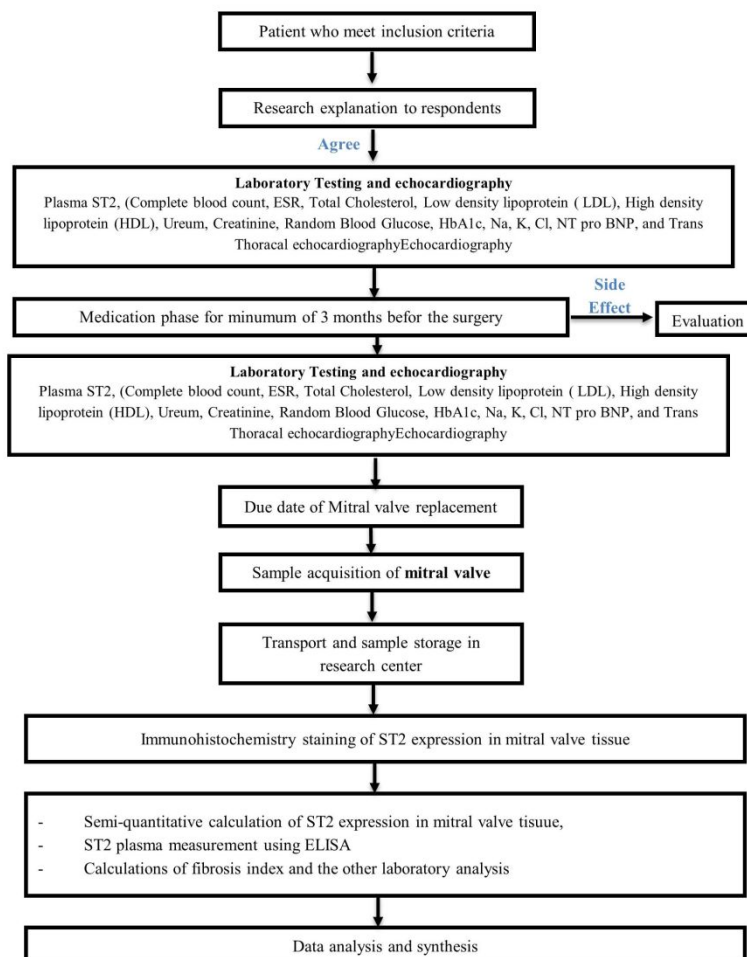

- 1  
2  
3  
4  
5  
6  
7  
8  
9  
10  
11  
12  
13  
14  
15  
16  
17  
18  
19  
20  
21  
22  
23  
24  
25  
26  
27  
28  
29  
30  
31  
32  
33  
34  
35  
36  
37  
38  
39  
40  
41  
42  
43  
44  
45  
46  
47  
48  
49  
50  
51  
52  
53  
54  
55  
56  
57  
58  
59  
60
- Sample size
- 14 Estimated number of participants needed to achieve study objectives and how it was determined, including clinical and statistical assumptions supporting any sample size calculations
- This is a pioneer study for analysing effects of Ramipril 5 mg toward ST2 expression in mitral valve tissue in human. Previous study that use ST2 human tissue is a study from Marzullo et al in 2016[12] that use carotid tissue from carotid endarterectomy, with sample size of 41 consecutive patients. Because our study will use human tissue sample, we approached the sample size calculation using multistage non-finite population method, using this specified precision estimation formula[13]:  $N = (Z\delta)/E$ , with  $N$ = sample size;  $Z_{0.95} = 1.96$ ;  $\delta N(0,1) = 1$ ; and  $E = 0.05$  for 0.95 confidence interval. So we calculate the sample and found that  $1.65(1)/0.05 = 33$  samples.
- According to the sample size of the previous study that analyse ST in human tissue and a sample size formula that commonly used in in-vivo study, we decide to use a sample size of 30 for each arm, and with the addition of drop out rate of 10%, become total of 66 for 2 arms.
- The number includes a 10% dropout and withdrawal in each group. Randomisation will be done in an equal ratio of Ramipril to placebo. An online, web-based sequence generator system will be used. It will be linked with codes for placebo and treatment tablets provided by the manufacturer contracted to produce the trial medication. Researchers and participants will be blinded. After randomisation, the treatment pack and capsule are identical between both groups will contain either active tablets or placebo. The principal investigator will have no access to the randomisation list.
- Recruitment
- 15 Strategies for achieving adequate participant enrolment to reach target sample size
- Patient recruitment will involve several cardiologists and cardiothoracic surgeons. All cardiologists and cardiothoracic surgeons in the hospital will be informed about this study, and to inform back if their patient suffered from Mitral valve stenosis. Technical meetings will be held and the professionals related to this study will be invited.

#### Methods: Assignment of interventions (for controlled trials)

Allocation:

- 1  
2  
3  
4  
5  
6  
7  
8  
9  
10  
11  
12  
13  
14  
15  
16  
17  
18  
19
- Sequence generation 16a Method of generating the allocation sequence (eg, computer-generated random numbers), and list of any factors for stratification. To reduce predictability of a random sequence, details of any planned restriction (eg, blocking) should be provided in a separate document that is unavailable to those who enrol participants or assign interventions
- Randomisation will be done in an equal ratio of Ramipril to placebo. An online, web-based sequence generator system will be used. It will be linked with codes for placebo and treatment tablets provided by the manufacturer contracted to produce the trial medication. Researchers and participants will be blinded. After randomisation, the treatment pack and capsule are identical between both groups will contain either active tablets or placebo. The principal investigator will have no access to the randomisation list.
- 20  
21  
22  
23  
24  
25  
26  
27  
28  
29  
30  
31  
32  
33  
34  
35
- Allocation concealment mechanism 16b Mechanism of implementing the allocation sequence (eg, central telephone; sequentially numbered, opaque, sealed envelopes), describing any steps to conceal the sequence until interventions are assigned
- Randomisation will be done in an equal ratio of Ramipril to placebo. An online, web-based sequence generator system will be used. It will be linked with codes for placebo and treatment tablets provided by the manufacturer contracted to produce the trial medication. Researchers and participants will be blinded. After randomisation, the treatment pack and capsule are identical between both groups will contain either active tablets or placebo. The principal investigator will have no access to the randomisation list.
- 36  
37  
38  
39  
40  
41  
42
- Implementation 16c Who will generate the allocation sequence, who will enrol participants, and who will assign participants to interventions
- Allocation sequence generation are from online, web-based sequence generator system. Participants will be enrolled with staff member responsible for patients enrollment.
- 43  
44  
45  
46  
47  
48  
49  
50  
51
- Blinding (masking) 17a Who will be blinded after assignment to interventions (eg, trial participants, care providers, outcome assessors, data analysts), and how
- Trial participants, investigators, analysts, care providers, will be blinded. Reserach assisstants whose role are to follow-up, evaluate and monitor the patients condition will not be blinded, so the drug could be stopped easily if there is any adverse effect from the treatment group.
- 52  
53  
54  
55  
56  
57  
58  
59  
60
- 17b If blinded, circumstances under which unblinding is permissible, and procedure for revealing a participant's allocated intervention during the trial
- Under the circumstances where actual treatment is absolutely necessary for further management of the patient, unblinding is permissible.

## Methods: Data collection, management, and analysis

- 1  
2  
3  
4  
5  
6  
7  
8  
9  
10  
11  
12  
13  
14  
15  
16  
17  
18  
19  
20  
21  
22  
23  
24  
25  
26  
27  
28  
29  
30  
31  
32  
33  
34  
35  
36  
37  
38  
39  
40  
41  
42  
43  
44  
45  
46  
47  
48  
49  
50  
51  
52  
53  
54  
55  
56  
57  
58  
59  
60
- Data collection methods
- 18a Plans for assessment and collection of outcome, baseline, and other trial data, including any related processes to promote data quality (eg, duplicate measurements, training of assessors) and a description of study instruments (eg, questionnaires, laboratory tests) along with their reliability and validity, if known. Reference to where data collection forms can be found, if not in the protocol
- Data collections will involve professional in each filed of data collection. For example: patients will be diagnosed with experienced cardiologists, surgery desicion based on the decision of a multidisciplinary team, echocardiography will be performed by the cardiologist who is specialized in echocardiography. Blood samples will be drawn by the experienced nurses in pathology clinic laboratory, ST2 plasma and tissue will be collected with the biomedical anlalysts, interview of study participants will be done by the trained assessors which. Study instruments involve questionnaires, laboratory tests, echocardiography, and biochemical tests. Study instruments will use same technique, same tools, same brands, and same place for data collection of each study participant.
- 18b Plans to promote participant retention and complete follow-up, including list of any outcome data to be collected for participants who discontinue or deviate from intervention protocols
- Participants will be informed that they are able to withdraw from the study at any time and will sign a reference as proof. They will be informed that this will not affect their clinical care. Basic clinical data and samples already collected will be included in the analyses in accord with the consent obtained at trial entry.
- Data management
- 19 Plans for data entry, coding, security, and storage, including any related processes to promote data quality (eg, double data entry; range checks for data values). Reference to where details of data management procedures can be found, if not in the protocol
- Participant files will be stored in numerical order and stored in a secure and accessible place and manner. Participants data will be copied in softfile and have back-up data.

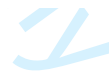



Statistical  
methods

20a Statistical methods for analysing primary and secondary outcomes. Reference to where other details of the statistical analysis plan can be found, if not in the protocol

| Variable/Outcome                         | Hypothesis                                                                               | Outcome Measure                                                                                                            | Methods of Analysis                  |
|------------------------------------------|------------------------------------------------------------------------------------------|----------------------------------------------------------------------------------------------------------------------------|--------------------------------------|
| <b>1) <u>Primary</u></b>                 | Participants adherence of Ramipril 5 mg for 3-6 months or placebo 3-6 months will be 80% | Remaining drug in the participants is not more than 20% of the study drug given, to evaluate the adherence.                | Manual counting, univariate analysis |
| a) ST2 expression in mitral valve tissue | Reduction occur                                                                          | Mitral valve tissue ST2 measured using percentage of-cell-expressing ST2 using immunohistochemistry method                 | T-test                               |
| <b>2) <u>Secondary</u></b>               |                                                                                          |                                                                                                                            |                                      |
| a) ST2 plasma level                      | Reduction occur                                                                          | Plasma ST2 concentration will be measured with the concentration calculated according to the absorbance in ELISA technique | T-test                               |
| b) NT-proBNP concentration               | Reduction occur                                                                          | NT-proBNP concentration is measured in clinical pathology laboratory using ELISA.                                          | T-test                               |
| c) Ejection fraction(EF) and TAPSE       | Improvement occur                                                                        | Measure was performed using same echocardiography pre and post test, documented in percentage.                             | T-test                               |
| d) NYHA class                            | Reduction occur                                                                          | NYHA class will be measured according to the clinical signs and symptoms classified in NYHA                                | Chi-square test                      |

1  
2  
3  
4  
5  
6  
7  
8  
9  
10  
11  
12  
13  
14  
15  
16  
17  
18  
19  
20  
21  
22  
23  
24  
25  
26  
27  
28  
29  
30  
31  
32  
33  
34  
35  
36  
37  
38  
39  
40  
41  
42  
43  
44  
45  
46  
47  
48  
49  
50  
51  
52  
53  
54  
55  
56  
57  
58  
59  
60

20b Methods for any additional analyses (eg, subgroup and adjusted analyses)  
Continuous variables were expressed as mean±SD and categorical variables as percentages. The  $\chi^2$  test was used to see the relationship between dichotomous variables and the Student t-test for continuous variables. Single variable correlation analysis and multivariable linear regression analysis will be performed. A P value <0.05 was considered statistically significant. The analyses were performed with the use of SPSS for Windows.

20c Definition of analysis population relating to protocol non-adherence (eg, as randomised analysis), and any statistical methods to handle missing data (eg, multiple imputation)  
This study will be analysed in per-protocol fashion. Handling missing data will use multiple imputation method. Analysis of the primary endpoint will be based on a log-rank test and, therefore, not affected by patient withdrawals (as they will be censored) provided that dropping out is unrelated to prognosis. The effect that any missing data might have on results will be assessed via sensitivity analysis of augmented data sets. Dropouts (essentially, participants who withdraw consent for continued follow-up) will be included in the analysis by modern imputation methods for missing data. After the imputations are completed, all of the data (complete and imputed) will be combined and the analysis performed for each imputed-and-completed dataset. Rubin's method of multiple imputation will be used to estimate treatment effect.

## Methods: Monitoring

Data monitoring 21a Composition of data monitoring committee (DMC); summary of its role and reporting structure; statement of whether it is independent from the sponsor and competing interests; and reference to where further details about its charter can be found, if not in the protocol. Alternatively, an explanation of why a DMC is not needed  
A Data Monitoring Committee (DMC) has been established. The DMC is independent of the study sponsor. During the period of recruitment to the study, interim analyses will be supplied, in strict confidence, to the DMC, together with any other analyses that the committee may request.

21b Description of any interim analyses and stopping guidelines, including who will have access to these interim results and make the final decision to terminate the trial  
An interim-analysis is performed on the primary endpoint when 80% of patients have been randomised and mitral valves have been obtained. The interim-analysis is performed by a statistician in this study member. Stopping decision (if needed) based on the decision of the primary investigators and will be reported to the ethics committee.

1  
2 Harms 22 Plans for collecting, assessing, reporting, and managing solicited and  
3 spontaneously reported adverse events and other unintended effects  
4 of trial interventions or trial conduct  
5 Adverse events that happen before the patient started to receive study  
6 intervention will not be reported as it is not related to the study drug. All  
7 adverse events occurring after the patient receiving study intervention until  
8 the end of the study will be recorded. Serious adverse event (SAE) related to  
9 this study treatment will be reported to the institutional review board and  
10 ethical committee. Serious adverse event including: life-threatening condition  
11 with immediate risk of death, severe or permanent disability, prolonged  
12 hospitalisation, or a significant hazard determined by the data safety  
13 monitoring board. SAE that is believed by the investigator and medical  
14 committee to be causally related to the study drug will be reported. SAE  
15 occurring a month after the subject is discontinued from the study will not be  
16 reported unless the investigators believed that the event have been caused by  
17 the study drug. The causal effects will be determined according to the  
18 temporal relationship, clinical course, previous medical conditions and  
19 concomitant medications.  
20  
21  
22  
23  
24  
25

26 Auditing 23 Frequency and procedures for auditing trial conduct, if any, and  
27 whether the process will be independent from investigators and the  
28 sponsor  
29 Ethic committee will audit the trial conduct  
30  
31

### 32 Ethics and dissemination

33  
34 Research ethics 24 Plans for seeking research ethics committee/institutional review board  
35 approval (REC/IRB) approval  
36 This protocol and the template informed consent forms contained in  
37 Appendix I has been reviewed and approved by the IRBs/ECs [*institutional*  
38 *review boards/ethical committees*] with respect to scientific content and  
39 compliance with applicable research and human subjects regulations.  
40 The protocol, site-specific informed consent forms is in local language.  
41 Participant education and recruitment materials, and other requested  
42 documents and any subsequent modifications also will be reviewed and  
43 approved by the ethical review bodies (IRBs/ECs).  
44  
45  
46  
47  
48  
49  
50  
51  
52  
53  
54  
55  
56  
57  
58  
59  
60

- 1  
2  
3  
4  
5  
6  
7  
8  
9  
10  
11  
12  
13  
14  
15  
16  
17  
18  
19  
20  
21  
22  
23  
24  
25  
26  
27  
28  
29  
30  
31  
32  
33  
34  
35  
36  
37  
38  
39  
40  
41  
42  
43  
44  
45  
46  
47  
48  
49  
50  
51  
52  
53  
54  
55  
56  
57  
58  
59  
60
- Protocol amendments 25 Plans for communicating important protocol modifications (eg, changes to eligibility criteria, outcomes, analyses) to relevant parties (eg, investigators, REC/IRBs, trial participants, trial registries, journals, regulators)  
Any modifications to the protocol which may impact on the conduct of the study, potential benefit of the patient or may affect patient safety, including changes of study objectives, study design, patient population, sample sizes, study procedures, or significant administrative aspects will require a formal amendment to the protocol. If such amendment happens, it will request an approval of the Ethics Committee/IRB [*institutional review board*] prior to implementation.
- Consent or assent 26a Who will obtain informed consent or assent from potential trial participants or authorised surrogates, and how (see Item 32)  
The member of investigators will explain and obtain informed consent.
- 26b Additional consent provisions for collection and use of participant data and biological specimens in ancillary studies, if applicable  
Additional biological samples will be obtained to be stored for use in future studies. It will be stored in research center inside this hospital with adequate and certified samples handling. A materials consent will be obtained to the collection of the plasma specimens.
- Confidentiality 27 How personal information about potential and enrolled participants will be collected, shared, and maintained in order to protect confidentiality before, during, and after the trial  
All study-related information will be stored securely in the principal investigator's locker with limited access. All participants data will be identified by a coded ID number to maintain the confidentiality. Laboratory specimens will be stored in research center with a safe storage and will be identified also with coded ID. Local database will be secured with password access systems and the access will be limited.
- Declaration of interests 28 Financial and other competing interests for principal investigators for the overall trial and each study site  
All of the investigators disclose no conflict of interests.
- Access to data 29 Statement of who will have access to the final trial dataset, and disclosure of contractual agreements that limit such access for investigators  
Data management coordinating team will oversee the intra-study data sharing process. All principal investigators will be given access to the cleaned datasets. Principal investigators will have direct access to their own data sets and will have access to other sites data by request. To ensure confidentiality, data dispersed to project team members will be blinded of any identifying participant information.

- 1  
2 Ancillary and 30 Provisions, if any, for ancillary and post-trial care, and for  
3 post-trial care compensation to those who suffer harm from trial participation  
4 Study participants are covered by compensation for negligent harm through  
5 the standard of this hospital. This will include cover for additional health  
6 care, if it has causal relationship with the study drug.  
7
- 8  
9 Dissemination 31a Plans for investigators and sponsor to communicate trial results to  
10 policy participants, healthcare professionals, the public, and other relevant  
11 groups (eg, via publication, reporting in results databases, or other  
12 data sharing arrangements), including any publication restrictions  
13 Investigators is not expected to report the data as individual report. All  
14 presentations and publications are expected to protect the integrity of the  
15 major objectives of the study; data that break the blind will not be presented  
16 prior to the release of the main results. Recommendation as to the timing of  
17 presentation of endpoint data which they might be presented will be given by  
18 the steering committee. Each paper abstract must be submitted to the  
19 appropriate subcommittee for review of its appropriateness and scientific  
20 merit prior to submission, the subcommittee may recomend changes to the  
21 authors and submit its recommendations to be approved by the steering  
22 committee. Publications of papers to workshops, symposia, volumes etc will  
23 be in the right of the principal investigators, and principal investigators could  
24 appoint and give permission for the other investigators or other party to  
25 present this paper. the study results will be released to the participating  
26 physicians, patients, and general medical community.  
27  
28  
29  
30  
31  
32  
33 31b Authorship eligibility guidelines and any intended use of professional  
34 writers  
35 Topics suggested for presentation or publication will be circulated to the PIs  
36 [*Principal investigators*] of the CCCs [*Core Coordinating Centers*], the DCC  
37 [*Data Coordinating Center*], and research center in hospital. These groups  
38 are requested to suggest and justify names for authors to be reviewed by the  
39 PC [*Publications Committee*].  
40  
41  
42 31c Plans, if any, for granting public access to the full protocol, participant-  
43 level dataset, and statistical code  
44 Data sharing statement: no later than 5 years after the collection of the 1-year  
45 post randomisation interviews, we will deliver a completely deidentified data  
46 set to an appropriate data archive for sharing purposes.  
47  
48  
49

## 50 Appendices

51  
52  
53  
54  
55  
56  
57  
58  
59  
60

1  
2 Informed consent 32 Model consent form and other related documentation given to  
3 materials participants and authorised surrogates  
4  
5  
6  
7

RAHASIA 1

## Lembar Informasi dan Persetujuan Pasien

**Judul Penelitian :**

**The Effect of Ramipril in Suppressing Gene Expression of Fibrosis in Left Atrial Appendage in Cardiac Mitral Stenosis Rheumatic Heart Disease Patients**

**Latar Belakang dan Tujuan Penelitian**

Penyakit jantung rematik merupakan beban penyakit utama di negara berkembang yang hampir 80% seluruh orang hidup dengan penyakit ini, dimana sebagai penyebab tingginya angka kematian dan kesakitan kardiovaskular pada anak dan remaja. Berdasarkan *Global Burden of Disease Study* (2010), jumlah pasien yang mengalami disabilitas karena penyakit jantung rematik sebanyak 10,1 juta per tahun di seluruh dunia.<sup>1</sup> *Rheumatic Mitral Valve Stenosis* (RMS) merupakan indikator utama penyakit jantung rematik yang dapat berdampak signifikan pada kematian dan kesakitan.

ST2 merupakan bagian reseptor IL-1 yang terdiri dari 2 bentuk, *a trans-membrane receptor* (ST2L) dan *soluble decoy receptor* (sST2).<sup>4</sup> Keduanya diinduksi di *cardiomyocytes* dan *fibroblast* yang terpapar tekanan biomekanik. Fungsi dari ST2 pada penyakit kardiovaskular, IL-33 telah terbukti memiliki efek anti-hipertrofik dan anti-fibrotik pada jantung, ditransduksi oleh ST2L.<sup>4</sup>

*Angiotensin-Converting Enzyme Inhibitors* (ACEI) sering digunakan untuk mencegah dan mengobati gagal jantung karena penyakit katup regurgitasi. Mayoritas pasien dengan penyakit jantung rematik simtomatik (RHD) memiliki mitral stenosis (MS) yang signifikan dan menolak terapi ACEI, hal ini disebabkan karena ditakutkan adanya hipotensi di kemudian hari dengan adanya obstruksi tetap.<sup>5</sup> ACEI pula dapat ditoleransi pada penyakit jantung rematik simtomatik berkaitan dengan mitral stenosis yang signifikan dan tetap mempertahankan fungsi sistolik ventrikel kiri.<sup>5</sup>

Efikasi pencegahan sekunder terbatas dalam mencegah progresivitas penyakit jantung rematik sehingga diperlukan adanya strategi dan terapi yang dibutuhkan untuk mencegah hal tersebut.<sup>3</sup> Terapi terbaru menargetkan ST2 dan reseptor seperti yang diteliti pada penyakit autoimun memungkinkan adanya pendekatan baru untuk pasien penyakit jantung rematik. ACEI merupakan agen dengan efek anti fibrosis. Oleh karena itu, peneliti ingin mengetahui efek Ramipril dalam memodulasi ekspresi gen fibrosis pada



## Lembar Informasi dan Persetujuan Pasien

RAHASIA 2

jaringan katup dan appendix atrium kiri pasien dengan penyakit jantung rematik di RS Jantung dan Pembuluh Darah Harapan Kita.

**Penjelasan tentang Prosedur Pelaksanaan**

Pasien dengan penyakit jantung rematik mitral stenosis yang akan dilakukan tindakan MVR/r akan diberikan Ramipril atau Placebo selama minimal 3 bulan dan maksimal 6 bulan yang akan dikonsumsi setiap hari sampai waktu untuk dilakukannya tindakan operasi.

**Partisipasi sukarela/pengunduran diri**

Partisipasi anda dalam penelitian ini bersifat sukarela, anda dapat menolak untuk berpartisipasi. Jika anda memutuskan untuk berpartisipasi, maka anda akan diberi lembar informasi ini untuk dipelajari isi dan tujuan penelitian. Anda dapat menyimpan lembar informasi ini dan anda akan diminta untuk mengisi dan menandatangani formulir persetujuan ini.

Anda dapat mengundurkan diri di awal saat anda membaca informasi dari penelitian ini dan tidak menyetujui untuk mengikuti penelitian tanpa harus memberikan alasan. Pengunduran diri anda tidak menimbulkan sanksi apapun dan anda tidak akan kehilangan manfaat yang akan menjadi hak anda.

**Manfaat partisipasi**

Secara pribadi anda dapat mengambil manfaat berpartisipasi dalam penelitian ini karena dapat membantu mengurangi gejala dan tanda penyakit jantung katup mitral rematik. Anda juga dapat memberikan manfaat bagi orang lain dalam pengembangan ilmu pengetahuan dan peningkatan kesehatan masyarakat secara luas.

**Resiko dan Ketidakyamanan**

Konsekuensi dari partisipasi ini mengharuskan anda untuk minum obat maksimal selama 6 bulan setiap hari sebelum dilakukannya tindakan MVR/r. Partisipasi akan melakukan pengambilan obat setiap bulannya ke tempat penelitian. Selain itu juga akan menjalani beberapa pemeriksaan penunjang medis seperti echocardiography dan

## Lembar Informasi dan Persetujuan Pasien

pengambilan darah yang akan dilakukan sebelum fase minum obat, dan setelah selesai minum obat.

**Kerahasiaan**

Semua data pada penelitian ini akan diambil tanpa memberikan identitas anda. Kerahasiaan data dan identitas Anda dilindungi oleh hukum dan atau peraturan yang berlaku, dan tidak akan diberitakan secara umum. Pada saat hasil diumumkan, identitas Anda akan tetap terjaga kerahasiaannya.

Hanya pihak yang terlibat dalam penelitian ini saja yang akan diberikan wewenang untuk dapat memperoleh dan mengetahui keadaan kesehatan Anda, termasuk didalamnya dokter Anda dan perawat, rumah sakit, pihak sponsor dan perwakilannya, dan atau anggota dari Komisi Etik. Anda mempunyai hak untuk mendapatkan segala informasi yang berhubungan dengan keikutsertaan Anda dalam penelitian ini.

**Persetujuan Komite Etik Kedokteran**

Penelitian ini diteliti dan disetujui oleh Komisi Etik Pusat Jantung Nasional Harapan Kita.

**Biaya**

Partisipan yang mengikuti penelitian ini akan diberikan biaya perjalanan/transportasi dari rumah ke tempat penelitian sebesar Rp. 100.000,- pada setiap bulan selama masa konsumsi obat. Biaya penelitian ditanggung oleh peneliti yang termasuk dalam paket penelitian.

**Lain-lain**

Jika anda merasa tidak nyaman, anda dapat memilih untuk tidak ikut serta dalam penelitian. Hal ini tidak akan mempengaruhi pelayanan rumah sakit terhadap anda di masa mendatang

RAHASIA 4

## Lembar Informasi dan Persetujuan Pasien

**Penawaran untuk Menjawab Pertanyaan**

Jika Anda mempunyai pertanyaan-pertanyaan mengenai studi ini, Anda dapat menghubungi:

dr. Ade Meidian Ambari, SpJPK

No. telepon. 021 – 568 4085 ext 2209

Silahkan untuk tidak mendatangi formulir ini jika anda tidak mempunyai kesempatan untuk bertanya atau tidak menerima jawaban-jawaban yang memuaskan terhadap pertanyaan-pertanyaan anda.

**Pernyataan Persetujuan**

Dengan menandatangani formulir ini, saya menyetujui bahwa penelitian ini telah dijelaskan kepada saya dan semua pertanyaan saya telah dijawab dengan memuaskan. Saya juga mempunyai hak untuk dapat mengundurkan diri dari penelitian ini setiap saat. Dengan pengertian tersebut, saya dengan sukarela ikut serta dalam penelitian ini. Saya mengerti bahwa formulir ini akan disimpan bersama dengan data kesehatan saya dan saya akan mendapatkan *copy* dari formulir ini.

|                         |                         |
|-------------------------|-------------------------|
| Nama Pasien : _____     | Nama Wali : _____       |
| Tanda tangan : _____    | Tanda tangan : _____    |
| Tanggal : ___/___/_____ | Tanggal : ___/___/_____ |

|                               |
|-------------------------------|
| Nama Dokter / Asisten : _____ |
| Tanda tangan : _____          |
| Tanggal : ___/___/_____       |

1  
2 Biological specimens 33 Plans for collection, laboratory evaluation, and storage of  
3 biological specimens for genetic or molecular analysis in the  
4 current trial and for future use in ancillary studies, if applicable  
5 Plasma specimens will be stored in biobank inside the research center  
6 in this hospital, and has been approved by the medical and ethical  
7 committee for the possible further researches.  
8  
9

---

11 \*It is strongly recommended that this checklist be read in conjunction with the SPIRIT 2013  
12 Explanation & Elaboration for important clarification on the items. Amendments to the  
13 protocol should be tracked and dated. The SPIRIT checklist is copyrighted by the SPIRIT  
14 Group under the Creative Commons "[Attribution-NonCommercial-NoDerivs 3.0 Unported](#)"  
15 license.  
16  
17  
18  
19  
20  
21  
22  
23  
24  
25  
26  
27  
28  
29  
30  
31  
32  
33  
34  
35  
36  
37  
38  
39  
40  
41  
42  
43  
44  
45  
46  
47  
48  
49  
50  
51  
52  
53  
54  
55  
56  
57  
58  
59  
60

# BMJ Open

## Randomised Controlled Trial into the role of ramipril in fibrosis reduction in Rheumatic Heart Disease: The RamiRHeD trial protocol

|                                 |                                                                                                                                                                                                                                                                                                                                                                                                                                                                                                                                                                                                                                                                                                                                                                                                                                                                                                                                                                                                                                                                                                                                                                                                                                                                                                                                                                                                                                                                                                                                                                                                                                                        |
|---------------------------------|--------------------------------------------------------------------------------------------------------------------------------------------------------------------------------------------------------------------------------------------------------------------------------------------------------------------------------------------------------------------------------------------------------------------------------------------------------------------------------------------------------------------------------------------------------------------------------------------------------------------------------------------------------------------------------------------------------------------------------------------------------------------------------------------------------------------------------------------------------------------------------------------------------------------------------------------------------------------------------------------------------------------------------------------------------------------------------------------------------------------------------------------------------------------------------------------------------------------------------------------------------------------------------------------------------------------------------------------------------------------------------------------------------------------------------------------------------------------------------------------------------------------------------------------------------------------------------------------------------------------------------------------------------|
| Journal:                        | <i>BMJ Open</i>                                                                                                                                                                                                                                                                                                                                                                                                                                                                                                                                                                                                                                                                                                                                                                                                                                                                                                                                                                                                                                                                                                                                                                                                                                                                                                                                                                                                                                                                                                                                                                                                                                        |
| Manuscript ID                   | bmjopen-2020-048016.R1                                                                                                                                                                                                                                                                                                                                                                                                                                                                                                                                                                                                                                                                                                                                                                                                                                                                                                                                                                                                                                                                                                                                                                                                                                                                                                                                                                                                                                                                                                                                                                                                                                 |
| Article Type:                   | Protocol                                                                                                                                                                                                                                                                                                                                                                                                                                                                                                                                                                                                                                                                                                                                                                                                                                                                                                                                                                                                                                                                                                                                                                                                                                                                                                                                                                                                                                                                                                                                                                                                                                               |
| Date Submitted by the Author:   | 01-Aug-2021                                                                                                                                                                                                                                                                                                                                                                                                                                                                                                                                                                                                                                                                                                                                                                                                                                                                                                                                                                                                                                                                                                                                                                                                                                                                                                                                                                                                                                                                                                                                                                                                                                            |
| Complete List of Authors:       | Ambari, Ade; RS Jantung Dan Pembuluh Darah Harapan Kita, Cardiology and Vascular Medicine; University of Indonesia Faculty of Medicine, Cardiology and vascular medicine<br>Setianto, Budhi ; RS Jantung Dan Pembuluh Darah Harapan Kita, Cardiology and Vascular Medicine; University of Indonesia Faculty of Medicine, Cardiology and vascular medicine<br>Santoso, Anwar; RS Jantung Dan Pembuluh Darah Harapan Kita, Cardiology and Vascular Medicine; University of Indonesia Faculty of Medicine, Cardiology and vascular medicine<br>Radi, Basuni; RS Jantung Dan Pembuluh Darah Harapan Kita, Cardiology and Vascular Medicine; University of Indonesia Faculty of Medicine, Cardiology and vascular medicine<br>Dwiputra, Bambang; RS Jantung Dan Pembuluh Darah Harapan Kita, Cardiology and Vascular Medicine; University of Indonesia Faculty of Medicine, Cardiology and vascular medicine<br>Susilowati, Eliana; RS Jantung Dan Pembuluh Darah Harapan Kita, Research assistant of preventive and rehabilitative cardiovascular<br>Tulrahmi, Fadilla; RS Jantung Dan Pembuluh Darah Harapan Kita, Research assistant of preventive and rehabilitative cardiovascular<br>Wind, Annemiek; University Medical Centre Utrecht Department of Cardiology, cardiology<br>cramer, maarten jan; University Medical Centre Utrecht Department of Cardiology, cardiology<br>Doevendans, Pieter; University Medical Centre Utrecht Department of Cardiology, Department of Cardiology, University Medical Center Utrecht, the Netherlands; Central Military Hospital, Central Military Hospital; Netherlands Heart Institute Utrecht The Netherlands |
| <b>Primary Subject Heading</b>: | Cardiovascular medicine                                                                                                                                                                                                                                                                                                                                                                                                                                                                                                                                                                                                                                                                                                                                                                                                                                                                                                                                                                                                                                                                                                                                                                                                                                                                                                                                                                                                                                                                                                                                                                                                                                |
| Secondary Subject Heading:      | Cardiovascular medicine                                                                                                                                                                                                                                                                                                                                                                                                                                                                                                                                                                                                                                                                                                                                                                                                                                                                                                                                                                                                                                                                                                                                                                                                                                                                                                                                                                                                                                                                                                                                                                                                                                |
| Keywords:                       | CARDIOLOGY, Valvular heart disease < CARDIOLOGY, Cardiothoracic surgery < SURGERY                                                                                                                                                                                                                                                                                                                                                                                                                                                                                                                                                                                                                                                                                                                                                                                                                                                                                                                                                                                                                                                                                                                                                                                                                                                                                                                                                                                                                                                                                                                                                                      |
|                                 |                                                                                                                                                                                                                                                                                                                                                                                                                                                                                                                                                                                                                                                                                                                                                                                                                                                                                                                                                                                                                                                                                                                                                                                                                                                                                                                                                                                                                                                                                                                                                                                                                                                        |

1  
2  
3  
4  
5  
6  
7  
8  
9  
10  
11  
12  
13  
14  
15  
16  
17  
18  
19  
20  
21  
22  
23  
24  
25  
26  
27  
28  
29  
30  
31  
32  
33  
34  
35  
36  
37  
38  
39  
40  
41  
42  
43  
44  
45  
46  
47  
48  
49  
50  
51  
52  
53  
54  
55  
56  
57  
58  
59  
60

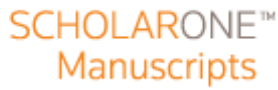

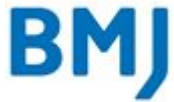

I, the Submitting Author has the right to grant and does grant on behalf of all authors of the Work (as defined in the below author licence), an exclusive licence and/or a non-exclusive licence for contributions from authors who are: i) UK Crown employees; ii) where BMJ has agreed a CC-BY licence shall apply, and/or iii) in accordance with the terms applicable for US Federal Government officers or employees acting as part of their official duties; on a worldwide, perpetual, irrevocable, royalty-free basis to BMJ Publishing Group Ltd ("BMJ") its licensees and where the relevant Journal is co-owned by BMJ to the co-owners of the Journal, to publish the Work in this journal and any other BMJ products and to exploit all rights, as set out in our [licence](#).

The Submitting Author accepts and understands that any supply made under these terms is made by BMJ to the Submitting Author unless you are acting as an employee on behalf of your employer or a postgraduate student of an affiliated institution which is paying any applicable article publishing charge ("APC") for Open Access articles. Where the Submitting Author wishes to make the Work available on an Open Access basis (and intends to pay the relevant APC), the terms of reuse of such Open Access shall be governed by a Creative Commons licence – details of these licences and which [Creative Commons](#) licence will apply to this Work are set out in our licence referred to above.

Other than as permitted in any relevant BMJ Author's Self Archiving Policies, I confirm this Work has not been accepted for publication elsewhere, is not being considered for publication elsewhere and does not duplicate material already published. I confirm all authors consent to publication of this Work and authorise the granting of this licence.

# 1 Randomised Controlled Trial into the role of ramipril in fibrosis reduction 2 in Rheumatic Heart Disease: The RamiRHeD trial protocol

3 Ade. M. Ambari<sup>1,2</sup>, Budhi Setianto<sup>1,2</sup>, Anwar Santoso<sup>1,2</sup>, Basuni Radi<sup>1,2</sup>, Bambang Dwiputra<sup>1,2</sup>, Eliana  
4 Susilowati<sup>3</sup>, Fadilla Tulrahmi<sup>3</sup>, Annemiek Wind<sup>4</sup>, Maarten J.Cramer<sup>4</sup>, Pieter Doevendans<sup>4,5</sup>

5 <sup>1</sup>Departement of Cardiology and Vascular Medicine, National Cardiovascular Center Harapan Kita,  
6 Indonesia

7 <sup>2</sup>Department of Cardiology and Vascular Medicine Faculty of Medicine University of Indonesia,

8 <sup>3</sup>Research Assistants of Preventive and Rehabilitative Cardiovascular, National Cardiovascular Center  
9 Harapan Kita

10 <sup>4</sup>Department of Cardiology, University Medical Center Utrecht, the Netherlands

11 <sup>5</sup>Central Military Hospital; Netherlands Heart Institute Utrecht The Netherlands.

12  
13 Corresponding author: Ade. M. Ambari (dr\_ade\_meidian@yahoo.co.id)

## 14 15 ABSTRACT

16 **Introduction** Rheumatic heart disease (RHD) is a major burden in developing countries and  
17 accounts for 80% of all people living with the disease, where it causes most cardiovascular  
18 morbidity and mortality in children and young adults. Chronic inflammation and fibrosis of heart  
19 valve tissue due to chronic inflammation in RHD will cause calcification and thickening of the  
20 impacted heart valves, especially the mitral valve. This fibrogenesis is enhanced by the production  
21 of angiotensin II by increased TGF- $\beta$  expression and later by the binding of IL-33, which is known  
22 to have anti-hypertrophic and anti-fibrotic effects, to soluble sST2. sST2 binding to this non-natural  
23 ligand worsens fibrosis. Therefore, we hypothesise that angiotensin-converting enzyme inhibitors  
24 (ACEIs) would improve rheumatic mitral valve stenosis.

25 **Methods and analysis** This is a single-centre, double-blind, placebo-controlled, randomised  
26 clinical trial with a pre-post test design. Patients with rheumatic mitral stenosis and valve  
27 dysfunction will be planned for cardiac valve replacement operation will be given ramipril 5  
28 mg or placebo for a minimum of 12 weeks before the surgery. The expression of ST2 in the  
29 mitral valve is considered to be representative of cardiac fibrosis. Mitral valve tissue will be  
30 stained by immunohistochemistry to ST2. Plasma ST2 will be measured by ELISA. This study  
31 is conducted in the Department of Cardiology and Vascular Medicine, Universitas Indonesia,  
32 National Cardiac Center Harapan Kita Hospital, Jakarta, Indonesia, starting on June 27th, 2019.  
33 The performance and dissemination of this study were approved by the ethics committee of  
34 National Cardiovascular Center Harapan Kita with ethical code  
35 LB.02.01/VII/286/KEP.009/2018. This study has been registered at [clinicaltrials.gov](http://clinicaltrials.gov) with the  
36 identifier code NCT03991910.

## 37 38 Strengths and limitations of the study

- 39 - A novel study that analysed the ST2 expression in rheumatic heart patients' mitral valves.
- 40 - This study proposed novel and affordable treatment targeting the rheumatic heart valve  
41 fibrosis reduction.
- 42 - This research will help low-to-middle-income countries treat rheumatic heart disease more  
43 economically.
- 44 - Flexible schedule of mitral valve surgery causes different time range of the intervention for  
45 each patient.
- 46 - No standard healthy control of the non-fibrotic valve, based on ethical consideration.

## 47 48 INTRODUCTION



1  
2  
3  
49 Rheumatic heart disease (RHD) is a serious health problem in developing nations, where  
50 it affects 80% of the population and accounts for the majority of cardiovascular morbidity and  
51 mortality in children and young adults. RHD affects more than 15.6 million individuals  
52 worldwide, with 233,000 people dying prematurely each year. [1] In the past 5 years,  
53 approximately 471 rheumatic mitral stenosis patients were treated in our Centre. [2] Treatments  
54 provided for RHD in advanced stages are relatively expensive for developing nations; thus,  
55 early detection and targeted treatment can greatly aid.[3] Mitral valve stenosis is the main  
56 presentation of RHD, commonly developing as a result of persistent or recurrent valvulitis with  
57 bicommissural fusion.[4] Fibrogenesis is induced by various stimuli, such as cytokines,  
58 connective tissue growth factors, and activators. Previous studies suggest that RHD is an  
59 autoimmune disease that is associated with cytokine activation.[4] Inflammatory cytokines are  
60 key regulators of immune processes. Chronic inflammation causes damage to the valvular  
61 tissue. Many studies have investigated potential biomarkers to evaluate fibrosis and chronic  
62 inflammation processes in RHD patients, and ST2 is a sensitive marker for detecting cardiac  
63 fibrosis, including fibrosis progression in RHD.[4–6]

64 ST2 is a member of the interleukin (IL)-1 receptor family discovered in a classical  
65 translational science fashion, and it exists in two forms: a transmembrane receptor (ST2L) and  
66 a soluble decoy receptor (sST2).[7] As a member of the interleukin (IL)-1 receptor family, ST2  
67 is a biomarker of mechanical stress that is up-regulated in isolated cardiomyocytes exposed to  
68 mechanical strain; derangement of ST2 signalling leads to a phenotype consistent with  
69 myocardial remodelling, and in patients with heart failure, sST2 levels strongly correlate with  
70 the severity of heart failure, independently forecasting risk on top of the risk from NT-proBNP  
71 and other biomarkers. Both sST2 and ST2L are induced in cardiomyocytes and fibroblasts  
72 exposed to biomechanical stress. Biomechanical stress and fibrosis will enhance valve  
73 thickening in RHD.[8] Clarifying the role played by ST2 in cardiovascular disease, IL-33  
74 signalling through ST2L has been shown to have anti-hypertrophic and anti-fibrotic effects in  
75 the heart.[7] Calcification and thickening of the mitral valves are enhanced by the production  
76 of angiotensin II. Angiotensin II induces the upregulation of transforming growth factor  $\beta$   
77 (TGF- $\beta$ ) and later the binding of IL-33 to sST2 instead of to its natural receptor ST2L. Binding  
78 of IL-33 to sST2 will cause fibrogenesis. Thus, ACEIs are hypothesised to attenuate this  
79 vicious cycle by inhibiting angiotensin II and consequently increasing bradykinin, which  
80 further inhibit fibrosis through the negative regulation of angiotensin II activity in mitogen-  
81 activated protein kinase (MAPK) pathways through the suppression of the Ca<sup>2+</sup> response and  
82 Na<sup>+</sup> transport.[9,10]

83 ACE inhibitors are frequently used to prevent and treat heart failure caused by regurgitant  
84 valve disease. Because of the risk of hypotension in the presence of a fixed obstruction, the  
85 majority of patients with symptomatic RHD have substantial mitral stenosis (MS) and refuse  
86 ACEI medication.[11] ACEI is the primary treatment for heart failure. The way ACEIs improve  
87 clinical symptoms and survival outcomes is to advance afterload reduction. Fibrosis attenuation  
88 and its anti-proliferative effects and neurohormonal effects are superior to those of pure  
89 vasodilators.[11] Current guidelines for valvular intervention do not include ACEI as therapy  
90 in rheumatic mitral stenosis patients. The only established therapeutic options for rheumatic  
91 mitral stenosis are balloon mitral valvuloplasty and mitral valve surgery. More economical  
92 therapeutic options that target the inhibition of fibrogenesis and improve mitral valve fibrosis  
93 are needed, especially in low- to middle-income countries. Valvular anti-inflammatory and  
94 anti-fibrotic medical therapy to slow the progression of the disease is needed in rheumatic  
95 mitral stenosis patients. One ACEI (enalapril) was well tolerated in symptomatic RHD  
96 associated with significant aortic and/or mitral stenosis and preserved left ventricular systolic  
97 function.[11]

1  
2  
3 98 Currently, there is no treatment for rheumatic mitral stenosis that targets the main  
4 99 pathogenesis, valvular fibrosis. Therefore, novel approaches and therapies are needed to  
5 prevent RHD progression.[4] Neutralising inflammatory cytokines or antagonising their  
6 100 receptor function has been considered a useful therapeutic strategy to treat autoimmune  
7 101 diseases.[4] In this respect, new therapies targeting ST2 and its ligands, as studied in some  
8 102 autoimmune diseases, may be a new approach for patients with RHD. ACEIs are agents with  
9 103 anti-fibrotic effects. This study therefore aims to investigate the effect of the ACE inhibitor  
10 104 ramipril in suppressing the expression of ST2 in the cardiac mitral valve in patients with RHD  
11 105 (Figure 1).  
12  
13  
14 106  
15 107  
16 108

## 17 109 **METHODS AND ANALYSIS**

### 18 110 **Study Designs**

19 111 This is a single-centre, double-blind, placebo-controlled, randomised clinical trial with a pre-  
20 112 post test design. Rheumatic mitral stenosis patients with valvular dysfunction who are  
21 113 scheduled for cardiac valve replacement will be treated with ramipril 5 mg or placebo for a  
22 114 minimum of 12 weeks (3 months) before the surgery. ST2 will be checked as a fibrosis marker  
23 115 (Figure 2). The study is still recruiting patients at the National Cardiac Center Harapan Kita  
24 116 Hospital, Jakarta, Indonesia, from June 27th, 2019.  
25  
26  
27  
28  
29  
30  
31

### 32 118 **Study Population**

33 119 Patients with rheumatic mitral valve stenosis (RMS) who undergo cardiac valve replacement  
34 120 in the National Cardiovascular Center Harapan Kita (NCCHK), Jakarta, Indonesia, will be  
35 121 screened for eligibility. The inclusion criteria of this study are patients with RMS or combined  
36 122 valve disease aged more than 18 years who undergo cardiac valve replacement operation with  
37 123 or without tricuspid valve repair. Patients must also have systolic blood pressure (SBP)  $\geq$  100  
38 124 mmHg and diastolic blood pressure (DBP)  $\geq$  60 mmHg. The exclusion criteria of this study are  
39 125 patients with congenital heart disease, non mitral valve surgery, coronary artery bypass surgery  
40 126 or refusal to provide informed consent. Further exclusion criteria are adults aged 65 years or  
41 127 over, pregnant women, and patients with autoimmune disease, persistent hypotension (SBP <  
42 128 100 mmHg), severe aortic stenosis (aortic valve orifice < 0.75 cm<sup>2</sup>), chronic renal dysfunction  
43 129 with serum creatinine > 2.5 mg/dL, or known ACEI intolerance. Participants who meet the  
44 130 criteria and are willing to join the RamiRHeD trial will be informed in detail about the study  
45 131 and will be required to sign the informed consent.  
46  
47  
48  
49  
50

### 51 133 **Outcomes**

52 134 The primary outcomes of this study are the ST2 expression in mitral valve tissue, and the  
53 135 secondary outcomes are soluble plasma ST2, clinical signs and symptoms, and other  
54 136 echocardiography and laboratory test results. Study participants will be followed up for cardiac  
55 137 and all-cause mortality outcomes until 1 year after the surgery.  
56  
57  
58  
59  
60

### 58 139 **Sample Size and Randomisation**



1  
2  
3 140 This is a pioneering study analysing the effects of 5 mg ramipril on ST2 expression in mitral  
4 141 valve tissue in humans. A previous study that used ST2 human tissue was conducted by  
5 142 Marzullo et al in 2016[12]. The used carotid tissue from carotid endarterectomy, with a sample  
6 143 size of 41 consecutive patients. Because our study will use human tissue samples, we  
7 144 approached the sample size calculation using the multistage non-finite population method,  
8 145 using this specified precision estimation formula[13]:  $N = (Z\delta)/E$ , with  $N$ = sample size;  $Z_{0.95}$ =  
9 146 1.96;  $\delta N(0,1) = 1$ ; and  $E= 0.05$  for a 0.95 confidence interval. Therefore, we calculated a  
10 147 required sample of  $1.65(1)/0.05= 33$  samples.

11 148 According to the sample size of the previous study that analysed ST in human tissue and a  
12 149 sample size formula that is commonly used in *in vivo* studies, we decided to use a sample size  
13 150 of 30 for each arm, and with the addition of a drop out rate of 10%, this became total of 66 for  
14 151 the 2 arms.

15 152 The number includes a 10% dropout and withdrawal from each group. Randomisation will be  
16 153 done with an equal ratio of ramipril to placebo. A computerised sequence generator is used for  
17 154 randomisation. It will be linked with codes for placebo and treatment tablets provided by the  
18 155 manufacturer that was contracted to produce the trial medication. Researchers and participants  
19 156 will be blinded. After randomisation, the treatment pack and capsule will be identical between  
20 157 the two groups and will contain either active tablets or placebo. The principal investigator will  
21 158 have no access to the randomisation list.

22 159

### 23 160 **Research technique**

24 161 The mitral valve surgery (MVS) will be mitral valve replacement. Echocardiography will  
25 162 establish the diagnosis of rheumatic mitral valve disease. Rheumatic valve disease will be  
26 163 diagnosed with World Heart Federation Criteria (2012) for RHD[14]. The reference  
27 164 measurement for valve area is planimetry by two-dimensional echocardiography. The Doppler  
28 165 technique is used to assess the mean mitral gradient. Seller's classification on left  
29 166 ventriculography in a right anterior oblique view angle of 30° will be performed to evaluate  
30 167 the severity of mitral valve regurgitation. In cases of missing data, substitution measurements  
31 168 will be used as previously described: Doppler half time pressure for valve area and colour  
32 169 Doppler for mitral regurgitation.[14]

33 170 Patient classification and diagnosis of rheumatic mitral stenosis will be determined by qualified  
34 171 cardiologists, and the decision to perform mitral valve replacement surgery will be based on  
35 172 the consensus of the multidisciplinary team, consisting of cardiologists and cardiothoracic  
36 173 surgeons. Echocardiography will be performed by echocardiography-consultant cardiologists.  
37 174 Blood samples will be collected by trained nurses specialised in pathology clinic laboratory  
38 175 work. Biomedical analysts will be in charge of the analysis and collection of ST2 in plasma  
39 176 and mitral valves. Detailed interviews with the study participants will be done by a well-trained  
40 177 medical doctor. The data will come from questionnaires, laboratory tests, echocardiography,  
41 178 and biochemical tests. The study instruments will use the same technique, same tools, same  
42 179 brands, and same place for data collection from each study participant.

43 180 Pre-existing atrial fibrillation, left atrial size, concomitant rheumatic valve disease, NYHA  
44 181 class, and other clinical data and echocardiographic data will be documented before and after  
45 182 surgery and will be analysed by multivariate analysis.

46 183

### 184 **Intervention**

185 Daily capsules containing 5 mg ramipril or placebo to be taken orally will be provided for the  
186 study participants. An initial dose of 2.5 mg of ramipril will be given to the patients in the  
187 intervention group. If there are no significant adverse effects documented in the first 2 weeks  
188 after the initial dose, 5 mg of ramipril will be given in the subsequent weeks until 5 days before  
189 mitral valve replacement surgery. Participants will remain under the care of the treating  
190 cardiologist team. The routine medications of each patient will be continued. Capsules  
191 containing 5 mg ramipril or placebo will be given for a minimum of 3 months, up until 5 days  
192 before the mitral valve replacement.

### 194 **Withdrawal and Drop out**

195 Participants will be informed that they are able to withdraw from the study at any time and will  
196 sign a form stating this. They will be informed that this will not affect their clinical care. Basic  
197 clinical data and samples already collected will be included in the analyses in accordance with  
198 the consent obtained at trial entry. Drop-out criteria will be loss to follow-up, severe adverse  
199 events, and mortality due to any cause.

### 201 **Sample Collection and Measurements**

202 Clinical signs and symptoms will be documented before and after the study. Blood samples  
203 will be collected twice: before the intervention and one day before the mitral valve surgery.  
204 The routine blood analysis will include haemoglobin, platelet count, leucocyte count,  
205 erythrocyte sedimentation rate (ESR), and C-reactive protein (CRP). Total cholesterol, random  
206 blood glucose, HbA1C, urea, creatinine, serum electrolytes, NTproBNP, and plasma ST2 will  
207 be determined. Echocardiography before the intervention and before surgery will be performed.  
208 Mitral valve tissue expression of ST2 will be measured by immunohistochemistry. Plasma ST2  
209 will be measured using an enzyme-linked immunoabsorbent assay (ELISA) kit with the human  
210 ST2/IL33R antibody (R&D Systems, catalogue number DST200). This assay uses the  
211 technique of the quantitative sandwich enzyme immunoassay. A monoclonal antibody specific  
212 for human ST2 is pre-coated onto a microplate. Standards and samples are pipetted into the  
213 wells, and any ST2 present is bound by the immobilised antibody. Unbound substances are  
214 washed away and then, an enzyme-linked polyclonal antibody specific for human ST2 is added  
215 to the wells. Following a wash to remove any unbound antibody-enzyme reagent, a substrate  
216 solution is added to the wells, and colour develops in proportion to the amount of ST2 bound  
217 in the initial step. After the colour development is stopped, the colour intensity is measured.  
218 Mitral valve and papillary muscle tissue will be collected during mitral valve replacement  
219 surgery and will be saved in a sterile container filled with 10% formalin. ST2 expression will  
220 be observed using immunohistochemistry (IHC). Cross-linking chemicals, such as  
221 paraformaldehyde and glutaraldehyde, will be used to preserve the cellular structure. The  
222 fixation begins when the tissue is harvested. Tissue blocking is performed afterwards by  
223 placing the tissue sample in hot parafilm, after which it is put into a mould until hard. Following  
224 fixation, tissue sections are obtained using a microtome. Decloaking methods consisting of heat  
225 and pressure treatment, enzyme digestion, and microwaving are done afterwards. Following  
226 decloaking, the parafilm on the slides is removed by baking, and then the IHC staining process  
227 can be started. The primary antibody is a monoclonal ST2 antibody. The secondary antibody

228 is conjugated by biotin. The blocking buffer includes BSA. The chromogen that will be used  
229 is 3,3'-diaminobenzidine (DAB). DAB oxidation is catalysed by horseradish peroxidase (HRP),  
230 after which it forms a brown precipitate, so ST2 expression can be visualised under a light  
231 microscope. The tissue will then be counterstained using haematoxylin-eosin staining, so the  
232 non-ST2-expressing cells can be visualised in bluish colour. A negative control will use  
233 haematoxylin-eosin staining only. Measurements of cells that express ST2 will be performed  
234 under a microscope. The date, tissue type, antibody dilution, tissue treatment, and  
235 magnification of the microscope will be documented. ST2-expressing cells will be counted by  
236 more than one professional.

237

### 238 **Statistical Analysis**

239 Continuous variables are expressed as mean±SD, and categorical variables are expressed as  
240 percentages. The  $\chi^2$  test will be used to see the relationship between dichotomous variables,  
241 and Student's t-test will be used for continuous variables. Single-variable correlation analysis  
242 and multivariable linear regression analysis will be performed. A P value <0.05 is considered  
243 statistically significant. The analyses will be performed with SPSS for Windows.

244

### 245 **Ethics and Dissemination**

246 The ethics of this study were approved by the ethics committee of National Cardiovascular  
247 Center Harapan Kita (NCCHK), Jakarta, Indonesia, with ethical code  
248 LB.02.01/VII/286/KEP.009/2018. This study has been registered at clinicaltrials.gov with the  
249 identifier code NCT03991910.

250

### 251 **DISCUSSION**

252 This study is planning to recruit rheumatic mitral valve patients to be randomised to obtain  
253 capsules containing either ramipril 5 mg or placebo. Rheumatic mitral stenosis is the main  
254 presentation of RHD that leads to significant morbidity and mortality. Recurrent or persistent  
255 valvulitis with bicommissural fusion usually leads to mitral stenosis. Previous studies suggest  
256 that RHD is an autoimmune disease that is associated with cytokine activities. Inflammatory  
257 cytokines are key regulators of immune processes.[4] Immunologic reactions caused by  
258 autoreactive antibodies continuously cause chronic inflammation and valvular fibrosis, which  
259 can be detected by an increase in sST2, an emerging biomarker for cardiac fibrosis.[10,15,16]

260 IL-33 is the natural ligand of ST2 and is highly expressed in smooth muscles and airway  
261 epithelia.[17] An inflammatory state stimulates the upregulation of ST2 by some cells, such as  
262 keratinocytes and dermal fibroblasts, and mechanical strain upregulates ST2 in cardiac  
263 fibroblasts.[17,18] The soluble ST2 isoform is increased under inflammatory conditions such  
264 as sepsis, allergic asthma, trauma, and pulmonary diseases.[19–22] Its elevation is also  
265 documented in some heart conditions, such as aortic stenosis and congestive cardiomyopathy,  
266 and this elevation is associated with the risk of heart failure and death.[23–27] In this study,  
267 plasma ST2 is considered an inflammatory and fibrotic biomarker of rheumatic mitral stenosis.  
268 Because plasma ST2 can also increase in various conditions unrelated to cardiac fibrosis, this  
269 study also measures the ST2 expression in mitral valve tissue. Plasma ST2 describes the

60

1  
2  
3 270 amount of ST2 in the circulation, whereas mitral valve cells that express ST2 describe the  
4 271 amount of transmembrane ST2.

5  
6 272 ACEIs are commonly administered as the treatment of heart failure due to valvular  
7 273 regurgitation. Its use in MS is still debatable because of its hypotensive effect. A prior study  
8 274 assessing the safety of ACEIs in MS patients showed that the ACEI enalapril was well tolerated  
9 275 and safe up to a dose of 10 mg bid.[11] ACEIs are presumed to have vasodilatory effects in  
10 276 obstructive lesions and will decrease systemic vascular resistance through arterial  
11 277 vasodilatation, thus increasing the transvalvular gradient. Their anti-remodelling effect is also  
12 278 well established, and their long-term use has also been proven to improve left ventricular  
13 279 ejection fraction (LVEF) in patients with systolic dysfunction.[28] Because a prior study[11]  
14 280 demonstrated the efficacy and the potential benefits of ACEIs in improving outcomes in MS  
15 281 patients, this study aims to confirm and investigate the possible pathological mechanism of  
16 282 those improvements. This study will assess the effect of 5 mg ramipril as a cardiac antifibrosis  
17 283 treatment in severe MS RHD patients. Their plasma ST2 concentrations will be compared.  
18 284 Plasma ST2 concentration will also be compared before and after several months of consuming  
19 285 5 mg ramipril. There will be no healthy controls for this study because of ethical limitations in  
20 286 the acquisition of mitral valve tissue. Mitral valve tissue will be acquired during mitral valve  
21 287 surgery. The expression of ST2 in mitral valve tissue will then be calculated semi-  
22 288 quantitatively and compared with the plasma ST2 results. It is hypothesised that ramipril will  
23 289 suppress the expression of ST2 in the cardiac mitral valve in patients with RHD.

24  
25  
26  
27  
28  
29  
30 290 In addition to the plasma ST2 level and the ST2 expression in mitral valve tissue, this  
31 291 study also compares the pre-post effects of 5 mg ramipril versus placebo on NT-proBNP  
32 292 concentration echocardiography strain parameters and clinical outcomes. Clinical signs and  
33 293 symptoms and echocardiography parameters have been evaluated in some studies of mitral  
34 294 valve stenosis, and showed that these were positively correlated with the NT-proBNP  
35 295 concentration.[29,30] This study will also compare the NT-proBNP concentration between  
36 296 patients receiving ramipril and placebo. We will also calculate the correlation between the NT-  
37 297 proBNP concentration and the ST2 plasma concentration and mitral valve expression.

38  
39  
40 298

#### 41 299 **Figure legends**

##### 42 300 **Figure 1 Hypothesis.**

43 301 Molecular mimicry is a defense mechanism of group A streptococcus to avoid immune cells.  
44 302 This mechanism allows immune cells to generate autoimmunity against protein the lining of  
45 303 endothelial cells and causing chronic inflammation and valvular damage. Continuous process  
46 304 of chronic inflammation leads to valvular thickening and fibrosis, which is mediated by the  
47 305 Angiotensin II. Angiotensin II increase TGF- $\beta$  expression and cause IL-33 to bind with sST2,  
48 306 and subsequently cause damage and fibrosis to the valvular tissue evenmore, which later will  
49 307 ended with rheumatic heart failure. ACEI is hypothized to counteract these processes by  
50 308 decreasing Angiotensin II conversion from Angiotensin I.

51  
52  
53  
54  
55 309

##### 56 310 **Figure 2 Research Flowchart**

57 311

##### 58 312 **Authors contributions**

59  
60

1  
2  
3 313 Conception and design of the work was initiated by AMA, BS, AS, BR, and BD. AMA, BD,  
4 314 ES, and FT contributed to the acquisition, analysis, and interpretation of data for the work. This  
5 315 manuscript was drafted by AMA, BD, and ES. AMA, PD, AW, and MJC critically revised the  
6 316 manuscript. The author and coauthors gave final approval and agree to be accountable for all  
7 317 aspects of the work and ensuring its integrity and accuracy.  
8  
9

10 318

### 11 319 **Funding**

12 320 This research received no specific grant from any funding agency in the public, commercial or  
13 321 not-for-profit sectors.  
14 322

15 322

### 16 323 **Competing interests statement**

17 324 The authors declare that the research was conducted in the absence of any commercial or financial  
18 325 relationships that could be construed as a potential conflict of interest.  
19  
20

21 325

### 22 326 **Patient and Public Involvement statement**

23 327 Patients are not involved in the recruitment to and conduct of this study protocol.  
24  
25

25 328

### 26 329 **REFERENCES**

- 27 330 1 Rodriguez-Fernandez R, Amiya R, Wyber R, *et al.* Rheumatic heart disease among  
28 331 adults in a mining community of Papua, Indonesia: findings from an occupational  
29 332 cohort. *Heart Asia* 2015;**7**:1 LP – 5. doi:10.1136/heartasia-2015-010641  
30 333 2 Ambari AM, Setianto B, Santoso A, *et al.* Survival analysis of patients with rheumatic  
31 334 MS after PBMV compared with MVS in a low-to-middle-income country. *Neth Heart*  
32 335 *J* 2019;**27**:559–64. doi:10.1007/s12471-019-01315-x  
33 336 3 Sharma N, Toor D. Interleukin-10: Role in increasing susceptibility and pathogenesis of  
34 337 rheumatic fever/rheumatic heart disease. *Cytokine* 2017;**90**:169–76.  
35 338 doi:https://doi.org/10.1016/j.cyto.2016.11.010  
36 339 4 Bilik MZ, Kaplan İ, Polat N, *et al.* Serum Levels of IL-17 and IL-23 in Patients With  
37 340 Rheumatic Mitral Stenosis. *Medicine (Baltimore)* 2016;**95**:e3562–e3562.  
38 341 doi:10.1097/MD.0000000000003562  
39 342 5 Ramona J, von M, Martin F, *et al.* Soluble ST2 - A Potential Biomarker of Rheumatic  
40 343 Heart Disease. *Clin Med Rev Case Reports* 2019;**6**. doi:10.23937/2378-3656/1410255  
41 344 6 Gardezi SKM, Coffey S, Prendergast BD, *et al.* Serum biomarkers in valvular heart  
42 345 disease. *Heart* 2018;**104**:349 LP – 358. doi:10.1136/heartjnl-2016-310482  
43 346 7 L Januzzi J. ST2 as a Cardiovascular Risk Biomarker: From the Bench to the Bedside.  
44 347 *J Cardiovasc Transl Res* 2013;**6**. doi:10.1007/s12265-013-9459-y  
45 348 8 Ayoub S, Ferrari G, Gorman RC, *et al.* Heart Valve Biomechanics and Underlying  
46 349 Mechanobiology. *Compr Physiol* 2016;**6**:1743–80. doi:10.1002/cphy.c150048  
47 350 9 Hus-Citharel A, Bouby N, Iturrioz X, *et al.* Multiple Cross Talk between Angiotensin  
48 351 II, Bradykinin, and Insulin Signaling in the Cortical Thick Ascending Limb of Rat  
49 352 Kidney. *Endocrinology* 2010;**151**:3181–94. doi:10.1210/en.2009-1237  
50 353 10 Ambari AM, Setianto B, Santoso A, *et al.* Angiotensin Converting Enzyme Inhibitors  
51 354 (ACEIs) Decrease the Progression of Cardiac Fibrosis in Rheumatic Heart Disease  
52 355 Through the Inhibition of IL-33/sST2. *Front Cardiovasc Med* 2020;**7**:115.  
53 356 doi:10.3389/fcvm.2020.00115  
54 357 11 Chockalingam A, Sangareddi V, Dorairajan S, *et al.* Safety and Efficacy of Enalapril in  
55 358 Multivalvular Heart Disease with Significant Mitral Stenosis—SCOPE-MS. *Angiology*



- 1  
2  
3 359 2005;**56**:151–8. doi:10.1177/000331970505600205
- 4 360 12 Marzullo A, Ambrosi F, Inchingolo M, *et al.* ST2L transmembrane receptor expression:  
5 361 An immunochemical study on endarterectomy samples. *PLoS One* 2016;**11**:1–12.  
6 362 doi:10.1371/journal.pone.0156315
- 7 363 13 Louangrath PI. Sample Size Determination for Non-Finite Population. *SSRN Electron J*  
8 364 2017;:1–12. doi:10.2139/ssrn.2710455
- 9 365 14 Reményi B, Wilson N, Steer A, *et al.* World Heart Federation criteria for  
10 366 echocardiographic diagnosis of rheumatic heart disease-an evidence-based guideline.  
11 367 *Nat Rev Cardiol* 2012;**9**:297–309. doi:10.1038/nrcardio.2012.7
- 12 368 15 Kakkar R, Lee RT. The IL-33/ST2 pathway: therapeutic target and novel biomarker. *Nat*  
13 369 *Rev Drug Discov* 2008;**7**:827–40. doi:10.1038/nrd2660
- 14 370 16 Miller AM. Role of IL-33 in inflammation and disease. *J Inflamm (Lond)* 2011;**8**:22.  
15 371 doi:10.1186/1476-9255-8-22
- 16 372 17 Schmitz J, Owyang A, Oldham E, *et al.* IL-33, an Interleukin-1-like Cytokine that  
17 373 Signals via the IL-1 Receptor-Related Protein ST2 and Induces T Helper Type 2-  
18 374 Associated Cytokines. *Immunity* 2005;**23**:479–90.  
19 375 doi:https://doi.org/10.1016/j.immuni.2005.09.015
- 20 376 18 Sanada S, Hakuno D, Higgins L, *et al.* IL-33 and ST2 Comprise a Critical  
21 377 Biomechanically Induced and Cardioprotective Signaling System. *J Clin Invest*  
22 378 2007;**117**:1538–49. doi:10.1172/JCI30634
- 23 379 19 Hayakawa H, Hayakawa M, Kume A, *et al.* Soluble ST2 Blocks Interleukin-33  
24 380 Signaling in Allergic Airway Inflammation. *J Biol Chem* 2007;**282**:26369–80.  
25 381 doi:10.1074/jbc.M704916200
- 26 382 20 Martinez-Rumayor A, Camargo C, M Green S, *et al.* Soluble ST2 Plasma  
27 383 Concentrations Predict 1-Year Mortality in Acutely Dyspneic Emergency Department  
28 384 Patients With Pulmonary Disease. *Am J Clin Pathol* 2008;**130**:578–84.  
29 385 doi:10.1309/WMG2BFRC97MKKQKP
- 30 386 21 Becerra A, Warke R, Xhaja K, *et al.* Increased activity of indoleamine 2,3-dioxygenase  
31 387 in serum from acutely infected dengue patients linked to gamma interferon antiviral  
32 388 function. *J Gen Virol* 2009;**90**:810–7. doi:10.1099/vir.0.004416-0
- 33 389 22 Brunner M, Krenn C, Roth G, *et al.* Increased levels of soluble ST2 protein and IgG1  
34 390 production in patients with sepsis and trauma. *Intensive Care Med* 2004;**30**:1468–73.  
35 391 doi:10.1007/s00134-004-2184-x
- 36 392 23 Bartunek J, Delrue L, Van Durme F, *et al.* Nonmyocardial Production of ST2 Protein in  
37 393 Human Hypertrophy and Failure Is Related to Diastolic Load. *J Am Coll Cardiol*  
38 394 2008;**52**:2166–74. doi:https://doi.org/10.1016/j.jacc.2008.09.027
- 39 395 24 Szerafin T, Niederpold T, Mangold A, *et al.* Secretion of Soluble ST2-Possible  
40 396 Explanation for Systemic Immunosuppression after Heart Surgery. *Thorac Cardiovasc*  
41 397 *Surg* 2009;**57**:25–9. doi:10.1055/s-2008-1039044
- 42 398 25 S Sabatine M, A Morrow D, Higgins L, *et al.* Complementary Roles for Biomarkers of  
43 399 Biomechanical Strain ST2 and N-Terminal Prohormone B-Type Natriuretic Peptide in  
44 400 Patients With ST-Elevation Myocardial Infarction. *Circulation* 2008;**117**:1936–44.  
45 401 doi:10.1161/CIRCULATIONAHA.107.728022
- 46 402 26 Mueller T, Dieplinger B, Alfons G, *et al.* Increased Plasma Concentrations of Soluble  
47 403 ST2 are Predictive for 1-Year Mortality in Patients with Acute Destabilized Heart  
48 404 Failure. *Clin Chem* 2008;**54**:752–6. doi:10.1373/clinchem.2007.096560
- 49 405 27 Shimpo M, A Morrow D, O Weinberg E, *et al.* Serum Levels of the Interleukin-1  
50 406 Receptor Family Member ST2 Predict Mortality and Clinical Outcome in Acute  
51 407 Myocardial Infarction. *Circulation* 2004;**109**:2186–90.  
52 408 doi:10.1161/01.CIR.0000127958.21003.5A

- 1  
2  
3 409 28 Jao G, Lystash J, Sane D. Angiotensin-Converting Enzyme Inhibitors Can Increase the  
4 410 Transvalvular Gradient Among Patients With Aortic Stenosis. *J Am Coll Cardiol*  
5 411 2012;**59**:777. doi:10.1016/j.jacc.2011.10.892  
6  
7 412 29 Arat-Özkan M.D A, Yiğit M.D Z, Ökçün M.D B, *et al.* Serum N-Terminal pro-BNP  
8 413 Levels Correlate with Symptoms and Echocardiographic Findings in Patients with  
9 414 Mitral Stenosis. *Echocardiography* 2005;**22**:473–8. doi:10.1111/j.1540-  
10 415 8175.2005.04085.x  
11 416 30 İltumur K, Karabulut A, Yokus B, *et al.* N-terminal proBNP plasma levels correlate with  
12 417 severity of mitral stenosis. *J Heart Valve Dis* 2005;**14**:735–41.  
13 418

14  
15  
16  
17  
18  
19  
20  
21  
22  
23  
24  
25  
26  
27  
28  
29  
30  
31  
32  
33  
34  
35  
36  
37  
38  
39  
40  
41  
42  
43  
44  
45  
46  
47  
48  
49  
50  
51  
52  
53  
54  
55  
56  
57  
58  
59  
60

For peer review only

1  
2  
3  
4  
5  
6  
7  
8  
9  
10  
11  
12  
13  
14  
15  
16  
17  
18  
19  
20  
21  
22  
23  
24  
25  
26  
27  
28  
29  
30  
31  
32  
33  
34  
35  
36  
37  
38  
39  
40  
41  
42  
43  
44  
45  
46  
47  
48  
49  
50  
51  
52  
53  
54  
55  
56  
57  
58  
59  
60

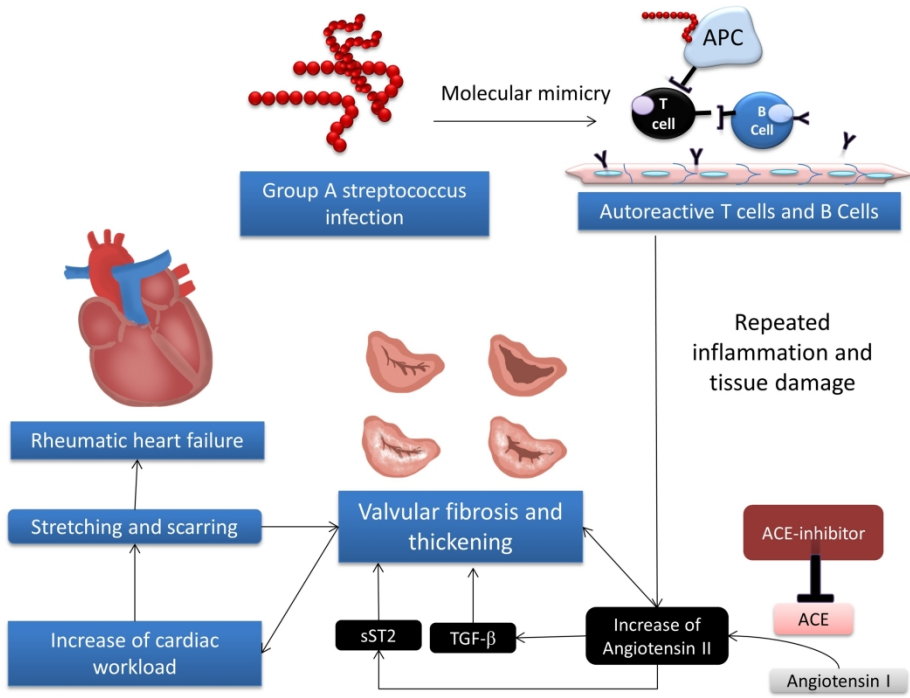

900x900mm (96 x 96 DPI)



1  
2  
3  
4  
5  
6  
7  
8  
9  
10  
11  
12  
13  
14  
15  
16  
17  
18  
19  
20  
21  
22  
23  
24  
25  
26  
27  
28  
29  
30  
31  
32  
33  
34  
35  
36  
37  
38  
39  
40  
41  
42  
43  
44  
45  
46  
47  
48  
49  
50  
51  
52  
53  
54  
55  
56  
57  
58  
59  
60

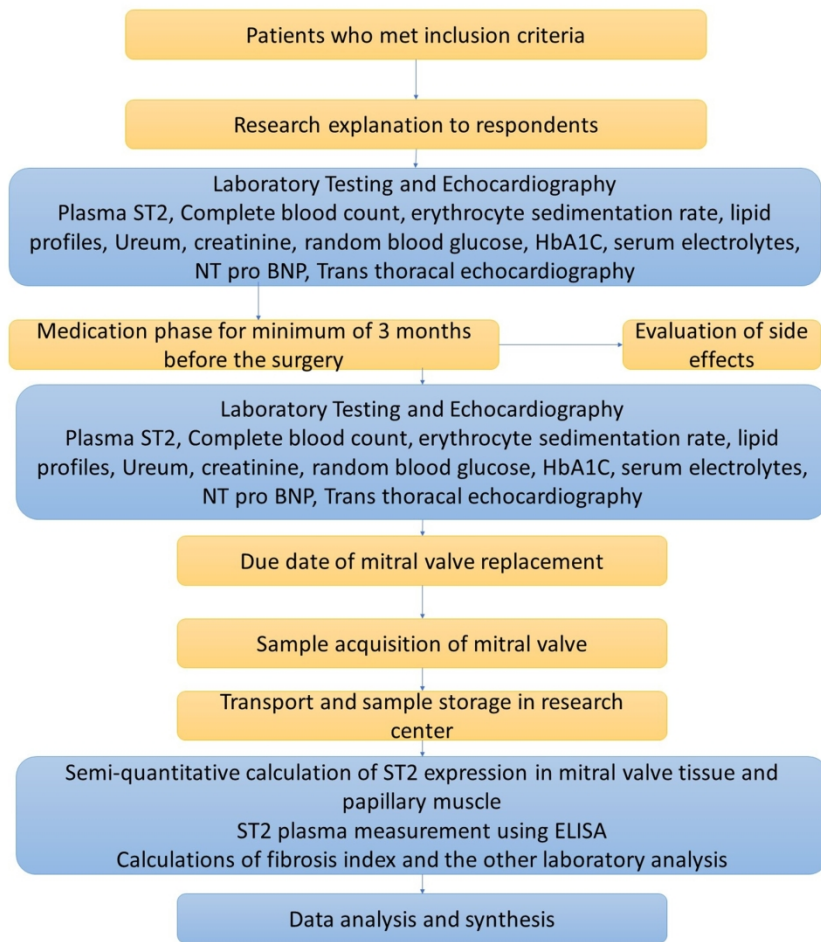

900x900mm (96 x 96 DPI)



SPIRIT 2013 Checklist: Recommended items to address in a clinical trial protocol and related documents\*

| Section/item                      | Item No | Description                                                                                                                                                                                                                     |
|-----------------------------------|---------|---------------------------------------------------------------------------------------------------------------------------------------------------------------------------------------------------------------------------------|
| <b>Administrative information</b> |         |                                                                                                                                                                                                                                 |
| Title                             | 1       | Descriptive title identifying the study design, population, interventions, and, if applicable, trial acronym<br>Randomised Controlled Trial into the role of ramipril in fibrosis reduction in RHD: The RamiRHeD trial protocol |
| Trial registration                | 2a      | Trial identifier and registry name. If not yet registered, name of intended registry<br>Clinicaltrials.gov NCT03991910                                                                                                          |

2b All items from the World Health Organization Trial Registration Data Set

|                          |                                                                                                                                              |
|--------------------------|----------------------------------------------------------------------------------------------------------------------------------------------|
| Register                 | ClinicalTrials.gov                                                                                                                           |
| Main ID                  | NCT03991910                                                                                                                                  |
| Protocol ID              | RamiRHeD                                                                                                                                     |
| Date of Registration     | 19/06/2019                                                                                                                                   |
| Prospective Registration | Yes                                                                                                                                          |
| Primary sponsor          | Harapan Kita National Cardiovascular Center/Indonesia University                                                                             |
| Public title             | The Effect of Ramipril in Suppressing ST2 Expression in Rheumatic Mitral Stenosis Patients                                                   |
| Scientific title         | The Effect of Ramipril in Suppressing Gene Expression of Fibrosis in Cardiac Mitral Stenosis in Patients With Rheumatic Heart Disease        |
| Date of first enrolment  | June 27, 2019                                                                                                                                |
| Target sample size       | 66                                                                                                                                           |
| Recruitment status       | Recruiting                                                                                                                                   |
| Study type               | Randomised clinical trial                                                                                                                    |
| Study design             | Allocation: Randomized. Intervention model: Parallel Assignment. Primary purpose: Treatment. Masking: Double (Participant, Investigator).    |
| Phase                    | Phase 3                                                                                                                                      |
| Countries of Recruitment | Indonesia                                                                                                                                    |
| Health condition         | ACE inhibitor<br>Fibrosis; heart<br>Mitral stenosis<br>Rheumatic heart disease<br>Rheumatic mitral stenosis                                  |
| Intervention (s)         | Drug: placebos<br>Drug: Ramipril 5 mg oral capsule                                                                                           |
| Primary outcome          | ST2 expression in mitral valve tissue                                                                                                        |
| Secondary outcome        | ST2 plasma level<br>NT-proBNP concentration (pg/ml)<br>Ejection fraction<br>TAPSE (tricuspid annular plane systolic excursion)<br>NYHA class |

Protocol version 3 Date and version identifier  
Released: 19-06-2019

Funding 4 Sources and types of financial, material, and other support  
No specific fundings outside our institution (Harapan Kita National Cardiovascular Center, Indonesia)

1  
2  
3  
4  
5  
6  
7  
8  
9  
10  
11  
12  
13  
14  
15  
16  
17  
18  
19  
20  
21  
22  
23  
24  
25  
26  
27  
28  
29  
30  
31  
32  
33  
34  
35  
36  
37  
38  
39  
40  
41  
42  
43  
44  
45  
46  
47  
48  
49  
50  
51  
52  
53  
54  
55  
56  
57  
58  
59  
60

**Roles and responsibilities**

- 5a Names, affiliations, and roles of protocol contributors**  
Ade M. Ambari • Budhi Setianto • Anwar Santoso • Basuni Radi • Bambang Dwiputra  
Department of Cardiology and Vascular Medicine Faculty of Medicine University of Indonesia, National Cardiovascular Center Harapan Kita, Jakarta, Indonesia
- Eliana Susilowati • Fadilla Tulrahmi  
Research Assistant Division of Preventive and Rehabilitative Cardiology, National Cardiovascular Centre Harapan Kita, Jakarta, Indonesia
- Maarten .J.M. Cramer • P.A. Doevendans • Annemiek Wind  
Department of Cardiology, University Medical Center Utrecht, Utrecht, The Netherlands
- Role:** Ade M. Ambari conceived the study. Ade M. Ambari, Pieter A. Doevendans, Maarten .J.M. Cramer, Budhi Setianto, Anwar Santoso, Basuni Radi, Bambang Dwiputra initiated the study design and conceptual framework. Ade M. Ambari, Bambang Dwiputra contribute in patients' recruitment and assessment, writing and editing. Eliana Susilowati contribute to the biomedical methods, sample collection, writing and editing. Fadilla Tulrahmi conducting the primary statistical analysis, randomisation, and sample size calculation. Ade M. Ambari, Pieter A. Doevendans, Maarten .J.M. Cramer, Annemiek Wind contribute to writing, protocol editing, language editing. All authors contributed to refinement of the study protocol and approved the final manuscript.
- 5b Name and contact information for the trial sponsor**  
Trial sponsor: Harapan Kita National Cardiovascular Center, Jakarta  
Contact name: Ade Meidian Ambari  
Address: S Parman Street number 87, Special Region of Jakarta, Indonesia  
Telephone: 0215681111  
Email: dr\_ade\_meidian@yahoo.co.id
- 5c Role of study sponsor and funders, if any, in study design; collection, management, analysis, and interpretation of data; writing of the report; and the decision to submit the report for publication, including whether they will have ultimate authority over any of these activities**  
This research received no specific grant from any funding agency in the public, commercial or not-for-profit sectors.
- 5d Composition, roles, and responsibilities of the coordinating centre, steering committee, endpoint adjudication committee, data management team, and other individuals or groups overseeing the trial, if applicable (see Item 21a for data monitoring committee)**

**Introduction****Principal Investigators**

Design and conduct of RCTRDMS  
Preparation of protocol and revisions  
Organising steering committee meetings  
Publication of study reports  
Members of TMC [*Trial Management Committee*]

**Steering committee (SC)**

Agreement of final protocol  
All lead investigators will be steering committee members  
Reviewing progress of study and if necessary agreeing changes to the protocol and/or investigators brochure to facilitate the smooth running of the study.

**Trial Management Committee (TMC)**

(Principle [*sic*] investigator, Research Physician, Administrator)

Study planning  
Organisation of steering committee meetings  
Provide annual risk report to ethics committee  
report serious adverse events (SAE) to medical committee and ethics committee  
Responsible for trial master file  
Budget administration and contractual issues with individual centres  
Advice for lead investigators  
Audit of 6 monthly feedback forms and decide when site visit to occur.  
Assistance with international review, board/independent ethics committee applications  
Data verification  
Randomisation  
Organisation of central serum sample collection

**Data Manager**

Maintenance of trial IT system and data entry  
Data verification

## Background and rationale

6a

Description of research question and justification for undertaking the trial, including summary of relevant studies (published and unpublished) examining benefits and harms for each intervention

Rheumatic heart disease (RHD) is a major burden in developing countries home to 80% of all people living with the disease where it causes most of the cardiovascular morbidity and mortality in children and young adults. Chronic inflammation and fibrosis of heart valve tissue due to chronic inflammation in RHD will cause calcification and thickening of the impacted heart valves, especially the mitral valve. This fibrogenesis is enhanced by the production of Angiotensin II by increasing TGF- $\beta$  expression and latter, the binding of IL-33 which is known to have anti-hyperthropic and anti-fibrotic effects to sST2. Its binding to the non-natural ligand of sST2 will worsen the fibrosis. Therefore, we hypothesized that Angiotensin-converting enzyme inhibitor (ACEI) will improve rheumatic mitral valve stenosis.

Existing knowledge: Angiotensin-converting enzyme inhibitors (ACEI) are first-line therapy in cardiac failure, and their symptomatic and survival benefits extend beyond afterload reduction. Reduction in fibrosis and anti-proliferative and neurohumoral effects contribute to the ACEI effect that is not reproduced by pure vasodilators. ACEI was well tolerated in symptomatic RHD associated with significant mitral stenosis and preserved left the ventricular systolic function. New therapies targeting ST 2 and their receptors as studied in some autoimmune diseases may promise a new approach for patients with RHD. We are assessing the effect of Ramipril in suppressing fibrotic protein expression in mitral valve (measured with ST2 expression) of patients with RHD in the National Cardiac Center Harapan Kita hospital Jakarta Indonesia.

Dose selection: Prevoious study (SCOPE trial) showed that ACEI (Enalapril) was well tolerated in symptomatic RHD associated with significant aortic and/or mitral stenosis and preserved left ventricular systolic function until dose of 10 mg bid. This study use Ramipril 5 mg as it is more commonly used in Indonesia.

Need for a trial: Current guidelines for valvular intervention do not include ACEI as therapy in rheumatic mitral stenosis patients. In developing countries, percutaneous balloon mitral valvuloplasty and mitral valve surgery are the therapeutic options for rheumatic mitral stenosis. Both of these treatments involve enormous expenses; it is the public health cost burden for developing countries. Valvular anti-inflammatory and anti-fibrosis medical therapy to suppress the progression of the disease is needed in rheumatic mitral stenosis patients.

|    |              |    |                                                                                  |
|----|--------------|----|----------------------------------------------------------------------------------|
| 1  |              |    |                                                                                  |
| 2  |              | 6b | Explanation for choice of comparators                                            |
| 3  |              |    | Current guidelines for valvular intervention do not include ACEI as therapy      |
| 4  |              |    | in rheumatic mitral stenosis patients. This study is divided in 2 arms. The      |
| 5  |              |    | first arm will be given Ramipril 5 mg as the intervention, while the second      |
| 6  |              |    | arm, will be given placebo as the comparator. The other individualized           |
| 7  |              |    | treatments for rheumatic valvular disease was still given in both arms as        |
| 8  |              |    | indicated.                                                                       |
| 9  |              |    |                                                                                  |
| 10 |              |    |                                                                                  |
| 11 | Objectives   | 7  | Specific objectives or hypotheses                                                |
| 12 |              |    | The investigators hypothesized that administration of Ramipril 5 mg for 3        |
| 13 |              |    | months will reduce expression of ST2 as fibrosis biomarkers, in the cardiac      |
| 14 |              |    | mitral valve of patients with Rheumatic Heart Disease with mitral stenosis.      |
| 15 |              |    |                                                                                  |
| 16 |              |    |                                                                                  |
| 17 | Trial design | 8  | Description of trial design including type of trial (eg, parallel group,         |
| 18 |              |    | crossover, factorial, single group), allocation ratio, and framework (eg,        |
| 19 |              |    | superiority, equivalence, noninferiority, exploratory)                           |
| 20 |              |    | This is a single-centre, double-blind, placebo-controlled, pre-post test design, |
| 21 |              |    | randomised clinical trial. Patients with mitral stenosis valvular dysfunction    |
| 22 |              |    | due to rheumatic process planned for cardiac valve replacement were given        |
| 23 |              |    | Ramipril 5 mg or placebo for minimum 12 weeks before the surgery. ST2            |
| 24 |              |    | was checked as fibrosis marker. This study will be conducted in the              |
| 25 |              |    | Department of Cardiology and Vascular Medicine, University Indonesia,            |
| 26 |              |    | National Cardiac Center Harapan Kita Hospital, Jakarta, Indonesia from           |
| 27 |              |    | June, 27th 2019.                                                                 |
| 28 |              |    |                                                                                  |
| 29 |              |    |                                                                                  |
| 30 |              |    |                                                                                  |
| 31 |              |    |                                                                                  |

### Methods: Participants, interventions, and outcomes

|    |                      |    |                                                                               |
|----|----------------------|----|-------------------------------------------------------------------------------|
| 32 |                      |    |                                                                               |
| 33 | Study setting        | 9  | Description of study settings (eg, community clinic, academic hospital)       |
| 34 |                      |    | and list of countries where data will be collected. Reference to where        |
| 35 |                      |    | list of study sites can be obtained                                           |
| 36 |                      |    | Study setting: in a national academic hospital. Patients come from various    |
| 37 |                      |    | regions in one country (Indonesia).                                           |
| 38 |                      |    |                                                                               |
| 39 |                      |    |                                                                               |
| 40 | Eligibility criteria | 10 | Inclusion and exclusion criteria for participants. If applicable, eligibility |
| 41 |                      |    | criteria for study centres and individuals who will perform the               |
| 42 |                      |    | interventions (eg, surgeons, psychotherapists)                                |
| 43 |                      |    | • Inclusion criteria of this study are: Patients with mitral valve stenosis   |
| 44 |                      |    | or a combination                                                              |
| 45 |                      |    | • aged more than 18 years                                                     |
| 46 |                      |    | • undergo cardiac valve replacement operation with or without a               |
| 47 |                      |    | tricuspid valve repair,                                                       |
| 48 |                      |    | • patients with systolic blood pressure (SBP) $\geq$ 100 mmHg and             |
| 49 |                      |    | diastolic blood pressure (DBP) $\geq$ 60 mmHg                                 |
| 50 |                      |    | • passed in medication phase without side effect minimum 4 weeks              |
| 51 |                      |    | until operation schedule                                                      |
| 52 |                      |    |                                                                               |
| 53 |                      |    |                                                                               |
| 54 |                      |    |                                                                               |
| 55 |                      |    |                                                                               |
| 56 |                      |    |                                                                               |
| 57 |                      |    |                                                                               |
| 58 |                      |    |                                                                               |
| 59 |                      |    |                                                                               |
| 60 |                      |    |                                                                               |



## Interventions

11a Interventions for each group with sufficient detail to allow replication, including how and when they will be administered

## Arms and Interventions

| Arms                                                                    | Interventions                                                                                                                                                                                       |
|-------------------------------------------------------------------------|-----------------------------------------------------------------------------------------------------------------------------------------------------------------------------------------------------|
| Placebo Comparator: control<br>control patients will be given a placebo | Drug: Placebos<br>the control group will be given placebo inside a capsule, so study participant won't be able to know the drug and doses inside the capsule (for masking)                          |
| Experimental: treatment<br>Ramipril 5 mg treatment group                | Drug: Ramipril 5Mg Oral Capsule<br>the treatment group will be given Ramipril 5 mg inside a capsule, so study participant won't be able to know the drug and doses inside the capsule (for masking) |

11b Criteria for discontinuing or modifying allocated interventions for a given trial participant (eg, drug dose change in response to harms, participant request, or improving/worsening disease)

Participants will be informed that they are able to withdraw from the study at any time and will sign a reference as proof. They will be informed that this will not affect their clinical care. Basic clinical data and samples already collected will be included in the analyses in accord with the consent obtained at trial entry. Drop out criteria will be Participants who are lost to follow up, participants with severe adverse events, mortality due to any cause.

11c Strategies to improve adherence to intervention protocols, and any procedures for monitoring adherence (eg, drug tablet return, laboratory tests)

Patients' adherence will be monitored with the drug return. Patients will be contacted via phone number to be reminded for routine administration. Patients are provided with the investigator contact if needed something to ask or to report adverse events or side effects (if any). Patients will be asked to visit the hospital where this study is enrolled to meet the investigator monthly. Each month, capsule return will be counted and patient will also be evaluated for the symptoms and vital signs.

11d Relevant concomitant care and interventions that are permitted or prohibited during the trial

Rescue medication: stop the drug. Patient will be admitted to hospital and undergone treatments according to the adverse effects.

Prohibited concomitant medication: Angiotensin receptor blocker.

- 1  
2 Outcomes 12 Primary, secondary, and other outcomes, including the specific  
3 measurement variable (eg, systolic blood pressure), analysis metric  
4 (eg, change from baseline, final value, time to event), method of  
5 aggregation (eg, median, proportion), and time point for each  
6 outcome. Explanation of the clinical relevance of chosen efficacy and  
7 harm outcomes is strongly recommended  
8  
9 Primary Outcome Measures :  
10 • ST2 plasma level  
11 plasma level of ST2 measured by ELISA  
12  
13  
14 Secondary Outcome Measures :  
15 • ST2 expression in mitral valve tissue  
16 expression of ST2 in mitral valve tissue, using immunohistochemistry  
17 method  
18  
19 • NT-proBNP concentration (pg/ml)  
20 concentration of NT-proBNP, plasma markers for cardiac dysfunction.  
21  
22 • ejection fraction  
23 echocardiography parameter  
24 • TAPSE (tricuspid annular plane systolic excursion)  
25 echocardiography parameter to assess right ventricular function  
26  
27 • NYHA class  
28 related symptoms will be graded in class I to IV according to NYHA.  
29  
30  
31  
32  
33  
34  
35  
36  
37  
38  
39  
40  
41  
42  
43  
44  
45  
46  
47  
48  
49  
50  
51  
52  
53  
54  
55  
56  
57  
58  
59  
60

Participant  
timeline

13 Time schedule of enrolment, interventions (including any run-ins and washouts), assessments, and visits for participants. A schematic diagram is highly recommended (see Figure)



1  
2  
3  
4 Sample size  
5  
6  
7  
8  
9  
10  
11  
12  
13  
14  
15  
16  
17  
18  
19  
20  
21  
22  
23  
24  
25  
26  
27  
28  
29  
30  
31  
32  
33  
34  
35

14 Estimated number of participants needed to achieve study objectives and how it was determined, including clinical and statistical assumptions supporting any sample size calculations

This is a pioneer study for analysing effects of Ramipril 5 mg toward ST2 expression in mitral valve tissue in human. Previous study that use ST2 human tissue is a study from Marzullo et al in 2016[12] that use carotid tissue from carotid endarterectomy, with sample size of 41 consecutive patients. Because our study will use human tissue sample, we approached the sample size calculation using multistage non-finite population method, using this specified precision estimation formula[13]:  $N = (Z\delta)/E$ , with  $N$ = sample size;  $Z_{0.95} = 1.96$ ;  $\delta N(0,1) = 1$ ; and  $E = 0.05$  for 0.95 confidence interval. So we calculate the sample and found that  $1.65(1)/0.05 = 33$  samples.

According to the sample size of the previous study that analyse ST in human tissue and a sample size formula that commonly used in in-vivo study, we decide to use a sample size of 30 for each arm, and with the addition of drop out rate of 10%, become total of 66 for 2 arms.

The number includes a 10% dropout and withdrawal in each group. Randomisation will be done in an equal ratio of Ramipril to placebo. An online, web-based sequence generator system will be used. It will be linked with codes for placebo and treatment tablets provided by the manufacturer contracted to produce the trial medication. Researchers and participants will be blinded. After randomisation, the treatment pack and capsule are identical between both groups will contain either active tablets or placebo. The principal investigator will have no access to the randomisation list.

36 Recruitment  
37  
38  
39  
40  
41  
42  
43  
44  
45

15 Strategies for achieving adequate participant enrolment to reach target sample size

Patient recruitment will involve several cardiologists and cardiothoracic surgeons. All cardiologists and cardiothoracic surgeons in the hospital will be informed about this study, and to inform back if their patient suffered from Mitral valve stenosis. Technical meetings will be held and the professionals related to this study will be invited.

#### Methods: Assignment of interventions (for controlled trials)

46  
47  
48 Allocation:  
49  
50  
51  
52  
53  
54  
55  
56  
57  
58  
59  
60

- 1  
2  
3  
4  
5  
6  
7  
8  
9  
10  
11  
12  
13  
14  
15  
16  
17  
18  
19
- Sequence generation 16a Method of generating the allocation sequence (eg, computer-generated random numbers), and list of any factors for stratification. To reduce predictability of a random sequence, details of any planned restriction (eg, blocking) should be provided in a separate document that is unavailable to those who enrol participants or assign interventions
- Randomisation will be done in an equal ratio of Ramipril to placebo. An online, web-based sequence generator system will be used. It will be linked with codes for placebo and treatment tablets provided by the manufacturer contracted to produce the trial medication. Researchers and participants will be blinded. After randomisation, the treatment pack and capsule are identical between both groups will contain either active tablets or placebo. The principal investigator will have no access to the randomisation list.
- 20  
21  
22  
23  
24  
25  
26  
27  
28  
29  
30  
31  
32  
33  
34  
35
- Allocation concealment mechanism 16b Mechanism of implementing the allocation sequence (eg, central telephone; sequentially numbered, opaque, sealed envelopes), describing any steps to conceal the sequence until interventions are assigned
- Randomisation will be done in an equal ratio of Ramipril to placebo. An online, web-based sequence generator system will be used. It will be linked with codes for placebo and treatment tablets provided by the manufacturer contracted to produce the trial medication. Researchers and participants will be blinded. After randomisation, the treatment pack and capsule are identical between both groups will contain either active tablets or placebo. The principal investigator will have no access to the randomisation list.
- 36  
37  
38  
39  
40  
41  
42
- Implementation 16c Who will generate the allocation sequence, who will enrol participants, and who will assign participants to interventions
- Allocation sequence generation are from online, web-based sequence generator system. Participants will be enrolled with staff member responsible for patients enrollment.
- 43  
44  
45  
46  
47  
48  
49  
50  
51
- Blinding (masking) 17a Who will be blinded after assignment to interventions (eg, trial participants, care providers, outcome assessors, data analysts), and how
- Trial participants, investigators, analysts, care providers, will be blinded. Reserach assisstants whose role are to follow-up, evaluate and monitor the patients condition will not be blinded, so the drug could be stopped easily if there is any adverse effect from the treatment group.
- 52  
53  
54  
55  
56  
57  
58  
59  
60
- 17b If blinded, circumstances under which unblinding is permissible, and procedure for revealing a participant's allocated intervention during the trial
- Under the circumstances where actual treatment is absolutely necessary for further management of the patient, unblinding is permissible.

## Methods: Data collection, management, and analysis

- 1  
2  
3  
4  
5  
6  
7  
8  
9  
10  
11  
12  
13  
14  
15  
16  
17  
18  
19  
20  
21  
22  
23  
24  
25  
26  
27  
28  
29  
30  
31  
32  
33  
34  
35  
36  
37  
38  
39  
40  
41  
42  
43  
44  
45  
46  
47  
48  
49  
50  
51  
52  
53  
54  
55  
56  
57  
58  
59  
60
- Data collection methods
- 18a Plans for assessment and collection of outcome, baseline, and other trial data, including any related processes to promote data quality (eg, duplicate measurements, training of assessors) and a description of study instruments (eg, questionnaires, laboratory tests) along with their reliability and validity, if known. Reference to where data collection forms can be found, if not in the protocol
- Data collections will involve professional in each filed of data collection. For example: patients will be diagnosed with experienced cardiologists, surgery desicion based on the decision of a multidisciplinary team, echocardiography will be performed by the cardiologist who is specialized in echocardiography. Blood samples will be drawn by the experienced nurses in pathology clinic laboratory, ST2 plasma and tissue will be collected with the biomedical anlalysts, interview of study participants will be done by the trained assessors which. Study instruments involve questionnaires, laboratory tests, echocardiography, and biochemical tests. Study instruments will use same technique, same tools, same brands, and same place for data collection of each study participant.
- 18b Plans to promote participant retention and complete follow-up, including list of any outcome data to be collected for participants who discontinue or deviate from intervention protocols
- Participants will be informed that they are able to withdraw from the study at any time and will sign a reference as proof. They will be informed that this will not affect their clinical care. Basic clinical data and samples already collected will be included in the analyses in accord with the consent obtained at trial entry.
- Data management
- 19 Plans for data entry, coding, security, and storage, including any related processes to promote data quality (eg, double data entry; range checks for data values). Reference to where details of data management procedures can be found, if not in the protocol
- Participant files will be stored in numerical order and stored in a secure and accessible place and manner. Participants data will be copied in softfile and have back-up data.



Statistical  
methods

20a Statistical methods for analysing primary and secondary outcomes. Reference to where other details of the statistical analysis plan can be found, if not in the protocol

| Variable/Outcome                         | Hypothesis                                                                               | Outcome Measure                                                                                                            | Methods of Analysis                  |
|------------------------------------------|------------------------------------------------------------------------------------------|----------------------------------------------------------------------------------------------------------------------------|--------------------------------------|
| <b>1) <u>Primary</u></b>                 | Participants adherence of Ramipril 5 mg for 3-6 months or placebo 3-6 months will be 80% | Remaining drug in the participants is not more than 20% of the study drug given, to evaluate the adherence.                | Manual counting, univariate analysis |
| a) ST2 expression in mitral valve tissue | Reduction occur                                                                          | Mitral valve tissue ST2 measured using percentage of-cell-expressing ST2 using immunohistochemistry method                 | T-test                               |
| <b>2) <u>Secondary</u></b>               |                                                                                          |                                                                                                                            |                                      |
| a) ST2 plasma level                      | Reduction occur                                                                          | Plasma ST2 concentration will be measured with the concentration calculated according to the absorbance in ELISA technique | T-test                               |
| b) NT-proBNP concentration               | Reduction occur                                                                          | NT-proBNP concentration is measured in clinical pathology laboratory using ELISA.                                          | T-test                               |
| c) Ejection fraction(EF) and TAPSE       | Improvement occur                                                                        | Measure was performed using same echocardiography pre and post test, documented in percentage.                             | T-test                               |
| d) NYHA class                            | Reduction occur                                                                          | NYHA class will be measured according to the clinical signs and symptoms classified in NYHA                                | Chi-square test                      |



1  
2  
3  
4  
5  
6  
7  
8  
9  
10  
11  
12  
13  
14  
15  
16  
17  
18  
19  
20  
21  
22  
23  
24  
25  
26  
27  
28  
29  
30  
31  
32  
33  
34  
35  
36  
37  
38  
39  
40  
41  
42  
43  
44  
45  
46  
47  
48  
49  
50  
51  
52  
53  
54  
55  
56  
57  
58  
59  
60

20b Methods for any additional analyses (eg, subgroup and adjusted analyses)  
Continuous variables were expressed as mean±SD and categorical variables as percentages. The  $\chi^2$  test was used to see the relationship between dichotomous variables and the Student t-test for continuous variables. Single variable correlation analysis and multivariable linear regression analysis will be performed. A P value <0.05 was considered statistically significant. The analyses were performed with the use of SPSS for Windows.

20c Definition of analysis population relating to protocol non-adherence (eg, as randomised analysis), and any statistical methods to handle missing data (eg, multiple imputation)  
This study will be analysed in per-protocol fashion. Handling missing data will use multiple imputation method. Analysis of the primary endpoint will be based on a log-rank test and, therefore, not affected by patient withdrawals (as they will be censored) provided that dropping out is unrelated to prognosis. The effect that any missing data might have on results will be assessed via sensitivity analysis of augmented data sets. Dropouts (essentially, participants who withdraw consent for continued follow-up) will be included in the analysis by modern imputation methods for missing data. After the imputations are completed, all of the data (complete and imputed) will be combined and the analysis performed for each imputed-and-completed dataset. Rubin's method of multiple imputation will be used to estimate treatment effect.

## Methods: Monitoring

Data monitoring 21a Composition of data monitoring committee (DMC); summary of its role and reporting structure; statement of whether it is independent from the sponsor and competing interests; and reference to where further details about its charter can be found, if not in the protocol. Alternatively, an explanation of why a DMC is not needed  
A Data Monitoring Committee (DMC) has been established. The DMC is independent of the study sponsor. During the period of recruitment to the study, interim analyses will be supplied, in strict confidence, to the DMC, together with any other analyses that the committee may request.

21b Description of any interim analyses and stopping guidelines, including who will have access to these interim results and make the final decision to terminate the trial  
An interim-analysis is performed on the primary endpoint when 80% of patients have been randomised and mitral valves have been obtained. The interim-analysis is performed by a statistician in this study member. Stopping decision (if needed) based on the decision of the primary investigators and will be reported to the ethics committee.

1  
2 Harms 22 Plans for collecting, assessing, reporting, and managing solicited and  
3 spontaneously reported adverse events and other unintended effects  
4 of trial interventions or trial conduct  
5 Adverse events that happen before the patient started to receive study  
6 intervention will not be reported as it is not related to the study drug. All  
7 adverse events occurring after the patient receiving study intervention until  
8 the end of the study will be recorded. Serious adverse event (SAE) related to  
9 this study treatment will be reported to the institutional review board and  
10 ethical committee. Serious adverse event including: life-threatening condition  
11 with immediate risk of death, severe or permanent disability, prolonged  
12 hospitalisation, or a significant hazard determined by the data safety  
13 monitoring board. SAE that is believed by the investigator and medical  
14 committee to be causally related to the study drug will be reported. SAE  
15 occurring a month after the subject is discontinued from the study will not be  
16 reported unless the investigators believed that the event have been caused by  
17 the study drug. The causal effects will be determined according to the  
18 temporal relationship, clinical course, previous medical conditions and  
19 concomitant medications.  
20  
21  
22  
23  
24  
25

26 Auditing 23 Frequency and procedures for auditing trial conduct, if any, and  
27 whether the process will be independent from investigators and the  
28 sponsor  
29 Ethic committee will audit the trial conduct  
30  
31

### 32 Ethics and dissemination

33  
34 Research ethics 24 Plans for seeking research ethics committee/institutional review board  
35 approval (REC/IRB) approval  
36 This protocol and the template informed consent forms contained in  
37 Appendix I has been reviewed and approved by the IRBs/ECs [*institutional*  
38 *review boards/ethical committees*] with respect to scientific content and  
39 compliance with applicable research and human subjects regulations.  
40 The protocol, site-specific informed consent forms is in local language.  
41 Participant education and recruitment materials, and other requested  
42 documents and any subsequent modifications also will be reviewed and  
43 approved by the ethical review bodies (IRBs/ECs).  
44  
45  
46  
47  
48  
49  
50  
51  
52  
53  
54  
55  
56  
57  
58  
59  
60

- 1  
2  
3  
4  
5  
6  
7  
8  
9  
10  
11  
12  
13  
14  
15  
16  
17  
18  
19  
20  
21  
22  
23  
24  
25  
26  
27  
28  
29  
30  
31  
32  
33  
34  
35  
36  
37  
38  
39  
40  
41  
42  
43  
44  
45  
46  
47  
48  
49  
50  
51  
52  
53  
54  
55  
56  
57  
58  
59  
60
- Protocol amendments 25 Plans for communicating important protocol modifications (eg, changes to eligibility criteria, outcomes, analyses) to relevant parties (eg, investigators, REC/IRBs, trial participants, trial registries, journals, regulators)  
Any modifications to the protocol which may impact on the conduct of the study, potential benefit of the patient or may affect patient safety, including changes of study objectives, study design, patient population, sample sizes, study procedures, or significant administrative aspects will require a formal amendment to the protocol. If such amendment happens, it will request an approval of the Ethics Committee/IRB [*institutional review board*] prior to implementation.
- Consent or assent 26a Who will obtain informed consent or assent from potential trial participants or authorised surrogates, and how (see Item 32)  
The member of investigators will explain and obtain informed consent.
- 26b Additional consent provisions for collection and use of participant data and biological specimens in ancillary studies, if applicable  
Additional biological samples will be obtained to be stored for use in future studies. It will be stored in research center inside this hospital with adequate and certified samples handling. A materials consent will be obtained to the collection of the plasma specimens.
- Confidentiality 27 How personal information about potential and enrolled participants will be collected, shared, and maintained in order to protect confidentiality before, during, and after the trial  
All study-related information will be stored securely in the principal investigator's locker with limited access. All participants data will be identified by a coded ID number to maintain the confidentiality. Laboratory specimens will be stored in research center with a safe storage and will be identified also with coded ID. Local database will be secured with password access systems and the access will be limited.
- Declaration of interests 28 Financial and other competing interests for principal investigators for the overall trial and each study site  
All of the investigators disclose no conflict of interests.
- Access to data 29 Statement of who will have access to the final trial dataset, and disclosure of contractual agreements that limit such access for investigators  
Data management coordinating team will oversee the intra-study data sharing process. All principal investigators will be given access to the cleaned datasets. Principal investigators will have direct access to their own data sets and will have access to other sites data by request. To ensure confidentiality, data dispersed to project team members will be blinded of any identifying participant information.

- 1  
2 Ancillary and 30 Provisions, if any, for ancillary and post-trial care, and for  
3 post-trial care compensation to those who suffer harm from trial participation  
4 Study participants are covered by compensation for negligent harm through  
5 the standard of this hospital. This will include cover for additional health  
6 care, if it has causal relationship with the study drug.  
7
- 8  
9 Dissemination 31a Plans for investigators and sponsor to communicate trial results to  
10 policy participants, healthcare professionals, the public, and other relevant  
11 groups (eg, via publication, reporting in results databases, or other  
12 data sharing arrangements), including any publication restrictions  
13 Investigators is not expected to report the data as individual report. All  
14 presentations and publications are expected to protect the integrity of the  
15 major objectives of the study; data that break the blind will not be presented  
16 prior to the release of the main results. Recommendation as to the timing of  
17 presentation of endpoint data which they might be presented will be given by  
18 the steering committee. Each paper abstract must be submitted to the  
19 appropriate subcommittee for review of its appropriateness and scientific  
20 merit prior to submission, the subcommittee may recomend changes to the  
21 authors and submit its recommendations to be approved by the steering  
22 committee. Publications of papers to workshops, symposia, volumes etc will  
23 be in the right of the principal investigators, and principal investigators could  
24 appoint and give permission for the other investigators or other party to  
25 present this paper. the study results will be released to the participating  
26 physicians, patients, and general medical community.  
27  
28  
29  
30  
31  
32  
33 31b Authorship eligibility guidelines and any intended use of professional  
34 writers  
35 Topics suggested for presentation or publication will be circulated to the PIs  
36 [*Principal investigators*] of the CCCs [*Core Coordinating Centers*], the DCC  
37 [*Data Coordinating Center*], and research center in hospital. These groups  
38 are requested to suggest and justify names for authors to be reviewed by the  
39 PC [*Publications Committee*].  
40  
41  
42 31c Plans, if any, for granting public access to the full protocol, participant-  
43 level dataset, and statistical code  
44 Data sharing statement: no later than 5 years after the collection of the 1-year  
45 post randomisation interviews, we will deliver a completely deidentified data  
46 set to an appropriate data archive for sharing purposes.  
47  
48  
49

## 50 Appendices

51  
52  
53  
54  
55  
56  
57  
58  
59  
60

1  
2 Informed consent 32 Model consent form and other related documentation given to  
3 materials participants and authorised surrogates  
4  
5  
6  
7

RAHASIA 1

## Lembar Informasi dan Persetujuan Pasien

**Judul Penelitian :**

**The Effect of Ramipril in Suppressing Gene Expression of Fibrosis in Left Atrial Appendage in Cardiac Mitral Stenosis Rheumatic Heart Disease Patients**

**Latar Belakang dan Tujuan Penelitian**

Penyakit jantung rematik merupakan beban penyakit utama di negara berkembang yang hampir 80% seluruh orang hidup dengan penyakit ini, dimana sebagai penyebab tingginya angka kematian dan kesakitan kardiovaskular pada anak dan remaja. Berdasarkan *Global Burden of Disease Study* (2010), jumlah pasien yang mengalami disabilitas karena penyakit jantung rematik sebanyak 10,1 juta per tahun di seluruh dunia.<sup>1</sup> *Rheumatic Mitral Valve Stenosis* (RMS) merupakan indikator utama penyakit jantung rematik yang dapat berdampak signifikan pada kematian dan kesakitan.

ST2 merupakan bagian reseptor IL-1 yang terdiri dari 2 bentuk, *a trans-membrane receptor* (ST2L) dan *soluble decoy receptor* (sST2).<sup>4</sup> Keduanya diinduksi di *cardiomyocytes* dan *fibroblast* yang terpapar tekanan biomekanik. Fungsi dari ST2 pada penyakit kardiovaskular, IL-33 telah terbukti memiliki efek anti-hipertrofik dan anti-fibrotik pada jantung, ditransduksi oleh ST2L.<sup>4</sup>

*Angiotensin-Converting Enzyme Inhibitors* (ACEI) sering digunakan untuk mencegah dan mengobati gagal jantung karena penyakit katup regurgitasi. Mayoritas pasien dengan penyakit jantung rematik simptomatik (RHD) memiliki mitral stenosis (MS) yang signifikan dan menolak terapi ACEI, hal ini disebabkan karena ditakutkan adanya hipotensi di kemudian hari dengan adanya obstruksi tetap.<sup>5</sup> ACEI pula dapat ditoleransi pada penyakit jantung rematik simptomatik berkaitan dengan mitral stenosis yang signifikan dan tetap mempertahankan fungsi sistolik ventrikel kiri.<sup>5</sup>

Efikasi pencegahan sekunder terbatas dalam mencegah progresivitas penyakit jantung rematik sehingga diperlukan adanya strategi dan terapi yang dibutuhkan untuk mencegah hal tersebut.<sup>3</sup> Terapi terbaru menargetkan ST2 dan reseptor seperti yang diteliti pada penyakit autoimun memungkinkan adanya pendekatan baru untuk pasien penyakit jantung rematik. ACEI merupakan agen dengan efek anti fibrosis. Oleh karena itu, peneliti ingin mengetahui efek Ramipril dalam memodulasi ekspresi gen fibrosis pada



## Lembar Informasi dan Persetujuan Pasien

RAHASIA 2

jaringan katup dan appendix atrium kiri pasien dengan penyakit jantung rematik di RS Jantung dan Pembuluh Darah Harapan Kita.

**Penjelasan tentang Prosedur Pelaksanaan**

Pasien dengan penyakit jantung rematik mitral stenosis yang akan dilakukan tindakan MVR/r akan diberikan Ramipril atau Placebo selama minimal 3 bulan dan maksimal 6 bulan yang akan dikonsumsi setiap hari sampai waktu untuk dilakukannya tindakan operasi.

**Partisipasi sukarela/pengunduran diri**

Partisipasi anda dalam penelitian ini bersifat sukarela, anda dapat menolak untuk berpartisipasi. Jika anda memutuskan untuk berpartisipasi, maka anda akan diberi lembar informasi ini untuk dipelajari isi dan tujuan penelitian. Anda dapat menyimpan lembar informasi ini dan anda akan diminta untuk mengisi dan menandatangani formulir persetujuan ini.

Anda dapat mengundurkan diri di awal saat anda membaca informasi dari penelitian ini dan tidak menyetujui untuk mengikuti penelitian tanpa harus memberikan alasan. Pengunduran diri anda tidak menimbulkan sanksi apapun dan anda tidak akan kehilangan manfaat yang akan menjadi hak anda.

**Manfaat partisipasi**

Secara pribadi anda dapat mengambil manfaat berpartisipasi dalam penelitian ini karena dapat membantu mengurangi gejala dan tanda penyakit jantung katup mitral rematik. Anda juga dapat memberikan manfaat bagi orang lain dalam pengembangan ilmu pengetahuan dan peningkatan kesehatan masyarakat secara luas.

**Resiko dan Ketidaknyamanan**

Konsekuensi dari partisipasi ini mengharuskan anda untuk minum obat maksimal selama 6 bulan setiap hari sebelum dilakukannya tindakan MVR/r. Partisipan akan melakukan pengambilan obat setiap bulannya ke tempat penelitian. Selain itu juga akan menjalani beberapa pemeriksaan penunjang medis seperti echocardiography dan

## Lembar Informasi dan Persetujuan Pasien

pengambilan darah yang akan dilakukan sebelum fase minum obat, dan setelah selesai minum obat.

**Kerahasiaan**

Semua data pada penelitian ini akan diambil tanpa memberikan identitas anda. Kerahasiaan data dan identitas Anda dilindungi oleh hukum dan atau peraturan yang berlaku, dan tidak akan diberitakan secara umum. Pada saat hasil diumumkan, identitas Anda akan tetap terjaga kerahasiaannya.

Hanya pihak yang terlibat dalam penelitian ini saja yang akan diberikan wewenang untuk dapat memperoleh dan mengetahui keadaan kesehatan Anda, termasuk didalamnya dokter Anda dan perawat, rumah sakit, pihak sponsor dan perwakilannya, dan atau anggota dari Komisi Etik. Anda mempunyai hak untuk mendapatkan segala informasi yang berhubungan dengan keikutsertaan Anda dalam penelitian ini.

**Persetujuan Komite Etik Kedokteran**

Penelitian ini diteliti dan disetujui oleh Komisi Etik Pusat Jantung Nasional Harapan Kita.

**Biaya**

Partisipan yang mengikuti penelitian ini akan diberikan biaya perjalanan/transportasi dari rumah ke tempat penelitian sebesar Rp. 100.000,- pada setiap bulan selama masa konsumsi obat. Biaya penelitian ditanggung oleh peneliti yang termasuk dalam paket penelitian.

**Lain-lain**

Jika anda merasa tidak nyaman, anda dapat memilih untuk tidak ikut serta dalam penelitian. Hal ini tidak akan mempengaruhi pelayanan rumah sakit terhadap anda di masa mendatang

RAHASIA 4

## Lembar Informasi dan Persetujuan Pasien

**Penawaran untuk Menjawab Pertanyaan**

Jika Anda mempunyai pertanyaan-pertanyaan mengenai studi ini, Anda dapat menghubungi:

dr. Ade Meidian Ambari, SpJPK

No. telepon. 021 – 568 4085 ext 2209

Silahkan untuk tidak mendatangi formulir ini jika anda tidak mempunyai kesempatan untuk bertanya atau tidak menerima jawaban-jawaban yang memuaskan terhadap pertanyaan-pertanyaan anda.

**Pernyataan Persetujuan**

Dengan menandatangani formulir ini, saya menyetujui bahwa penelitian ini telah dijelaskan kepada saya dan semua pertanyaan saya telah dijawab dengan memuaskan. Saya juga mempunyai hak untuk dapat mengundurkan diri dari penelitian ini setiap saat. Dengan pengertian tersebut, saya dengan sukarela ikut serta dalam penelitian ini. Saya mengerti bahwa formulir ini akan disimpan bersama dengan data kesehatan saya dan saya akan mendapatkan *copy* dari formulir ini.

|                         |                         |
|-------------------------|-------------------------|
| Nama Pasien : _____     | Nama Wali : _____       |
| Tanda tangan : _____    | Tanda tangan : _____    |
| Tanggal : ___/___/_____ | Tanggal : ___/___/_____ |

|                               |
|-------------------------------|
| Nama Dokter / Asisten : _____ |
| Tanda tangan : _____          |
| Tanggal : ___/___/_____       |

1  
2 Biological specimens 33 Plans for collection, laboratory evaluation, and storage of  
3 biological specimens for genetic or molecular analysis in the  
4 current trial and for future use in ancillary studies, if applicable  
5 Plasma specimens will be stored in biobank inside the research center  
6 in this hospital, and has been approved by the medical and ethical  
7 committee for the possible further researches.  
8  
9

---

11 \*It is strongly recommended that this checklist be read in conjunction with the SPIRIT 2013  
12 Explanation & Elaboration for important clarification on the items. Amendments to the  
13 protocol should be tracked and dated. The SPIRIT checklist is copyrighted by the SPIRIT  
14 Group under the Creative Commons "[Attribution-NonCommercial-NoDerivs 3.0 Unported](#)"  
15 license.  
16  
17  
18  
19  
20  
21  
22  
23  
24  
25  
26  
27  
28  
29  
30  
31  
32  
33  
34  
35  
36  
37  
38  
39  
40  
41  
42  
43  
44  
45  
46  
47  
48  
49  
50  
51  
52  
53  
54  
55  
56  
57  
58  
59  
60

# BMJ Open

## Randomised Controlled Trial into the role of ramipril in fibrosis reduction in Rheumatic Heart Disease: The RamiRHeD trial protocol

|                                 |                                                                                                                                                                                                                                                                                                                                                                                                                                                                                                                                                                                                                                                                                                                                                                                                                                                                                                                                                                                                                                                                                                                                                                                                                                                                                                                                                                                                                                                                                                                                                                                                                                                        |
|---------------------------------|--------------------------------------------------------------------------------------------------------------------------------------------------------------------------------------------------------------------------------------------------------------------------------------------------------------------------------------------------------------------------------------------------------------------------------------------------------------------------------------------------------------------------------------------------------------------------------------------------------------------------------------------------------------------------------------------------------------------------------------------------------------------------------------------------------------------------------------------------------------------------------------------------------------------------------------------------------------------------------------------------------------------------------------------------------------------------------------------------------------------------------------------------------------------------------------------------------------------------------------------------------------------------------------------------------------------------------------------------------------------------------------------------------------------------------------------------------------------------------------------------------------------------------------------------------------------------------------------------------------------------------------------------------|
| Journal:                        | <i>BMJ Open</i>                                                                                                                                                                                                                                                                                                                                                                                                                                                                                                                                                                                                                                                                                                                                                                                                                                                                                                                                                                                                                                                                                                                                                                                                                                                                                                                                                                                                                                                                                                                                                                                                                                        |
| Manuscript ID                   | bmjopen-2020-048016.R2                                                                                                                                                                                                                                                                                                                                                                                                                                                                                                                                                                                                                                                                                                                                                                                                                                                                                                                                                                                                                                                                                                                                                                                                                                                                                                                                                                                                                                                                                                                                                                                                                                 |
| Article Type:                   | Protocol                                                                                                                                                                                                                                                                                                                                                                                                                                                                                                                                                                                                                                                                                                                                                                                                                                                                                                                                                                                                                                                                                                                                                                                                                                                                                                                                                                                                                                                                                                                                                                                                                                               |
| Date Submitted by the Author:   | 18-Aug-2021                                                                                                                                                                                                                                                                                                                                                                                                                                                                                                                                                                                                                                                                                                                                                                                                                                                                                                                                                                                                                                                                                                                                                                                                                                                                                                                                                                                                                                                                                                                                                                                                                                            |
| Complete List of Authors:       | Ambari, Ade; RS Jantung Dan Pembuluh Darah Harapan Kita, Cardiology and Vascular Medicine; University of Indonesia Faculty of Medicine, Cardiology and vascular medicine<br>Setianto, Budhi ; RS Jantung Dan Pembuluh Darah Harapan Kita, Cardiology and Vascular Medicine; University of Indonesia Faculty of Medicine, Cardiology and vascular medicine<br>Santoso, Anwar; RS Jantung Dan Pembuluh Darah Harapan Kita, Cardiology and Vascular Medicine; University of Indonesia Faculty of Medicine, Cardiology and vascular medicine<br>Radi, Basuni; RS Jantung Dan Pembuluh Darah Harapan Kita, Cardiology and Vascular Medicine; University of Indonesia Faculty of Medicine, Cardiology and vascular medicine<br>Dwiputra, Bambang; RS Jantung Dan Pembuluh Darah Harapan Kita, Cardiology and Vascular Medicine; University of Indonesia Faculty of Medicine, Cardiology and vascular medicine<br>Susilowati, Eliana; RS Jantung Dan Pembuluh Darah Harapan Kita, Research assistant of preventive and rehabilitative cardiovascular<br>Tulrahmi, Fadilla; RS Jantung Dan Pembuluh Darah Harapan Kita, Research assistant of preventive and rehabilitative cardiovascular<br>Wind, Annemiek; University Medical Centre Utrecht Department of Cardiology, cardiology<br>cramer, maarten jan; University Medical Centre Utrecht Department of Cardiology, cardiology<br>Doevendans, Pieter; University Medical Centre Utrecht Department of Cardiology, Department of Cardiology, University Medical Center Utrecht, the Netherlands; Central Military Hospital, Central Military Hospital; Netherlands Heart Institute Utrecht The Netherlands |
| <b>Primary Subject Heading</b>: | Cardiovascular medicine                                                                                                                                                                                                                                                                                                                                                                                                                                                                                                                                                                                                                                                                                                                                                                                                                                                                                                                                                                                                                                                                                                                                                                                                                                                                                                                                                                                                                                                                                                                                                                                                                                |
| Secondary Subject Heading:      | Cardiovascular medicine                                                                                                                                                                                                                                                                                                                                                                                                                                                                                                                                                                                                                                                                                                                                                                                                                                                                                                                                                                                                                                                                                                                                                                                                                                                                                                                                                                                                                                                                                                                                                                                                                                |
| Keywords:                       | CARDIOLOGY, Valvular heart disease < CARDIOLOGY, Cardiothoracic surgery < SURGERY                                                                                                                                                                                                                                                                                                                                                                                                                                                                                                                                                                                                                                                                                                                                                                                                                                                                                                                                                                                                                                                                                                                                                                                                                                                                                                                                                                                                                                                                                                                                                                      |
|                                 |                                                                                                                                                                                                                                                                                                                                                                                                                                                                                                                                                                                                                                                                                                                                                                                                                                                                                                                                                                                                                                                                                                                                                                                                                                                                                                                                                                                                                                                                                                                                                                                                                                                        |



1  
2  
3  
4  
5  
6  
7  
8  
9  
10  
11  
12  
13  
14  
15  
16  
17  
18  
19  
20  
21  
22  
23  
24  
25  
26  
27  
28  
29  
30  
31  
32  
33  
34  
35  
36  
37  
38  
39  
40  
41  
42  
43  
44  
45  
46  
47  
48  
49  
50  
51  
52  
53  
54  
55  
56  
57  
58  
59  
60





I, the Submitting Author has the right to grant and does grant on behalf of all authors of the Work (as defined in the below author licence), an exclusive licence and/or a non-exclusive licence for contributions from authors who are: i) UK Crown employees; ii) where BMJ has agreed a CC-BY licence shall apply, and/or iii) in accordance with the terms applicable for US Federal Government officers or employees acting as part of their official duties; on a worldwide, perpetual, irrevocable, royalty-free basis to BMJ Publishing Group Ltd ("BMJ") its licensees and where the relevant Journal is co-owned by BMJ to the co-owners of the Journal, to publish the Work in this journal and any other BMJ products and to exploit all rights, as set out in our [licence](#).

The Submitting Author accepts and understands that any supply made under these terms is made by BMJ to the Submitting Author unless you are acting as an employee on behalf of your employer or a postgraduate student of an affiliated institution which is paying any applicable article publishing charge ("APC") for Open Access articles. Where the Submitting Author wishes to make the Work available on an Open Access basis (and intends to pay the relevant APC), the terms of reuse of such Open Access shall be governed by a Creative Commons licence – details of these licences and which [Creative Commons](#) licence will apply to this Work are set out in our licence referred to above.

Other than as permitted in any relevant BMJ Author's Self Archiving Policies, I confirm this Work has not been accepted for publication elsewhere, is not being considered for publication elsewhere and does not duplicate material already published. I confirm all authors consent to publication of this Work and authorise the granting of this licence.

# 1 Randomised Controlled Trial into the role of ramipril in fibrosis reduction 2 in Rheumatic Heart Disease: The RamiRHeD trial protocol

3 Ade. M. Ambari<sup>1,2</sup>, Budhi Setianto<sup>1,2</sup>, Anwar Santoso<sup>1,2</sup>, Basuni Radi<sup>1,2</sup>, Bambang Dwiputra<sup>1,2</sup>, Eliana  
4 Susilowati<sup>3</sup>, Fadilla Tulrahmi<sup>3</sup>, Annemiek Wind<sup>4</sup>, Maarten J.Cramer<sup>4</sup>, Pieter Doevendans<sup>4,5</sup>

5 <sup>1</sup>Departement of Cardiology and Vascular Medicine, National Cardiovascular Center Harapan Kita,  
6 Indonesia

7 <sup>2</sup>Department of Cardiology and Vascular Medicine Faculty of Medicine University of Indonesia,

8 <sup>3</sup>Research Assistants of Preventive and Rehabilitative Cardiovascular, National Cardiovascular Center  
9 Harapan Kita

10 <sup>4</sup>Department of Cardiology, University Medical Center Utrecht, the Netherlands

11 <sup>5</sup>Central Military Hospital; Netherlands Heart Institute Utrecht The Netherlands.

12  
13 Corresponding author: Ade. M. Ambari (dr\_ade\_meidian@yahoo.co.id)

## 14 15 ABSTRACT

16 **Introduction** Rheumatic heart disease (RHD) is a major burden in developing countries and  
17 accounts for 80% of all people living with the disease, where it causes most cardiovascular  
18 morbidity and mortality in children and young adults. Chronic inflammation and fibrosis of heart  
19 valve tissue due to chronic inflammation in RHD will cause calcification and thickening of the  
20 impacted heart valves, especially the mitral valve. This fibrogenesis is enhanced by the production  
21 of angiotensin II by increased TGF- $\beta$  expression and later by the binding of IL-33, which is known  
22 to have anti-hypertrophic and anti-fibrotic effects, to soluble sST2. sST2 binding to this non-natural  
23 ligand worsens fibrosis. Therefore, we hypothesise that angiotensin-converting enzyme inhibitors  
24 (ACEIs) would improve rheumatic mitral valve stenosis.

25 **Methods and analysis** This is a single-centre, double-blind, placebo-controlled, randomised  
26 clinical trial with a pre-post test design. Patients with rheumatic mitral stenosis and valve  
27 dysfunction will be planned for cardiac valve replacement operation will be given ramipril 5  
28 mg or placebo for a minimum of 12 weeks before the surgery. The expression of ST2 in the  
29 mitral valve is considered to be representative of cardiac fibrosis. Mitral valve tissue will be  
30 stained by immunohistochemistry to ST2. Plasma ST2 will be measured by ELISA. This study  
31 is conducted in the Department of Cardiology and Vascular Medicine, Universitas Indonesia,  
32 National Cardiac Center Harapan Kita Hospital, Jakarta, Indonesia, starting on June 27th, 2019.  
33 The performance and dissemination of this study were approved by the ethics committee of  
34 National Cardiovascular Center Harapan Kita with ethical code  
35 LB.02.01/VII/286/KEP.009/2018. This study has been registered at [clinicaltrials.gov](http://clinicaltrials.gov) with the  
36 identifier code NCT03991910.

## 37 38 Strengths and limitations of the study

- 39 - A novel study that analysed the ST2 expression in rheumatic heart patients' mitral valves.
- 40 - This study proposed novel and affordable treatment targeting the rheumatic heart valve  
41 fibrosis reduction.
- 42 - This research will help low-to-middle-income countries treat rheumatic heart disease more  
43 economically.
- 44 - Flexible schedule of mitral valve surgery causes different time range of the intervention for  
45 each patient.
- 46 - No standard healthy control of the non-fibrotic valve, based on ethical consideration.

## 47 48 INTRODUCTION

1  
2  
3  
49 Rheumatic heart disease (RHD) is a serious health problem in developing nations, where  
50 it affects 80% of the population and accounts for the majority of cardiovascular morbidity and  
51 mortality in children and young adults. RHD affects more than 15.6 million individuals  
52 worldwide, with 233,000 people dying prematurely each year. [1] In the past 5 years,  
53 approximately 471 rheumatic mitral stenosis patients were treated in our Centre. [2] Treatments  
54 provided for RHD in advanced stages are relatively expensive for developing nations; thus,  
55 early detection and targeted treatment can greatly aid.[3] Mitral valve stenosis is the main  
56 presentation of RHD, commonly developing as a result of persistent or recurrent valvulitis with  
57 bicommissural fusion.[4] Fibrogenesis is induced by various stimuli, such as cytokines,  
58 connective tissue growth factors, and activators. Previous studies suggest that RHD is an  
59 autoimmune disease that is associated with cytokine activation.[4] Inflammatory cytokines are  
60 key regulators of immune processes. Chronic inflammation causes damage to the valvular  
61 tissue. Many studies have investigated potential biomarkers to evaluate fibrosis and chronic  
62 inflammation processes in RHD patients, and ST2 is a sensitive marker for detecting cardiac  
63 fibrosis, including fibrosis progression in RHD.[4–6]

64 ST2 is a member of the interleukin (IL)-1 receptor family discovered in a classical  
65 translational science fashion, and it exists in two forms: a transmembrane receptor (ST2L) and  
66 a soluble decoy receptor (sST2).[7] As a member of the interleukin (IL)-1 receptor family, ST2  
67 is a biomarker of mechanical stress that is up-regulated in isolated cardiomyocytes exposed to  
68 mechanical strain; derangement of ST2 signalling leads to a phenotype consistent with  
69 myocardial remodelling, and in patients with heart failure, sST2 levels strongly correlate with  
70 the severity of heart failure, independently forecasting risk on top of the risk from NT-proBNP  
71 and other biomarkers. Both sST2 and ST2L are induced in cardiomyocytes and fibroblasts  
72 exposed to biomechanical stress. Biomechanical stress and fibrosis will enhance valve  
73 thickening in RHD.[8] Clarifying the role played by ST2 in cardiovascular disease, IL-33  
74 signalling through ST2L has been shown to have anti-hypertrophic and anti-fibrotic effects in  
75 the heart.[7] Calcification and thickening of the mitral valves are enhanced by the production  
76 of angiotensin II. Angiotensin II induces the upregulation of transforming growth factor  $\beta$   
77 (TGF- $\beta$ ) and later the binding of IL-33 to sST2 instead of to its natural receptor ST2L. Binding  
78 of IL-33 to sST2 will cause fibrogenesis. Thus, ACEIs are hypothesised to attenuate this  
79 vicious cycle by inhibiting angiotensin II and consequently increasing bradykinin, which  
80 further inhibit fibrosis through the negative regulation of angiotensin II activity in mitogen-  
81 activated protein kinase (MAPK) pathways through the suppression of the Ca<sup>2+</sup> response and  
82 Na<sup>+</sup> transport.[9,10]

83 ACE inhibitors are frequently used to prevent and treat heart failure caused by regurgitant  
84 valve disease. Because of the risk of hypotension in the presence of a fixed obstruction, the  
85 majority of patients with symptomatic RHD have substantial mitral stenosis (MS) and refuse  
86 ACEI medication.[11] ACEI is the primary treatment for heart failure. The way ACEIs improve  
87 clinical symptoms and survival outcomes is to advance afterload reduction. Fibrosis attenuation  
88 and its anti-proliferative effects and neurohormonal effects are superior to those of pure  
89 vasodilators.[11] Current guidelines for valvular intervention do not include ACEI as therapy  
90 in rheumatic mitral stenosis patients. The only established therapeutic options for rheumatic  
91 mitral stenosis are balloon mitral valvuloplasty and mitral valve surgery. More economical  
92 therapeutic options that target the inhibition of fibrogenesis and improve mitral valve fibrosis  
93 are needed, especially in low- to middle-income countries. Valvular anti-inflammatory and  
94 anti-fibrotic medical therapy to slow the progression of the disease is needed in rheumatic  
95 mitral stenosis patients. One ACEI (enalapril) was well tolerated in symptomatic RHD  
96 associated with significant aortic and/or mitral stenosis and preserved left ventricular systolic  
97 function.[11]

1  
2  
3 98 Currently, there is no treatment for rheumatic mitral stenosis that targets the main  
4 99 pathogenesis, valvular fibrosis. Therefore, novel approaches and therapies are needed to  
5 prevent RHD progression.[4] Neutralising inflammatory cytokines or antagonising their  
6 100 receptor function has been considered a useful therapeutic strategy to treat autoimmune  
7 101 diseases.[4] In this respect, new therapies targeting ST2 and its ligands, as studied in some  
8 102 autoimmune diseases, may be a new approach for patients with RHD. ACEIs are agents with  
9 103 anti-fibrotic effects. This study therefore aims to investigate the effect of the ACE inhibitor  
10 104 ramipril in suppressing the expression of ST2 in the cardiac mitral valve in patients with RHD  
11 105 (Figure 1).  
12 106  
13 107  
14 108

## 15 109 **METHODS AND ANALYSIS**

### 16 110 **Study Designs**

17 111 This is a single-centre, double-blind, placebo-controlled, randomised clinical trial with a pre-  
18 112 post test design. Rheumatic mitral stenosis patients with valvular dysfunction who are  
19 113 scheduled for cardiac valve replacement will be treated with ramipril 5 mg or placebo for a  
20 114 minimum of 12 weeks (3 months) before the surgery. ST2 will be checked as a fibrosis marker  
21 115 (Figure 2). The study is still recruiting patients at the National Cardiac Center Harapan Kita  
22 116 Hospital, Jakarta, Indonesia, from June 27th, 2019.  
23 117

### 24 118 **Study Population**

25 119 Patients with rheumatic mitral valve stenosis (RMS) who undergo cardiac valve replacement  
26 120 in the National Cardiovascular Center Harapan Kita (NCCHK), Jakarta, Indonesia, will be  
27 121 screened for eligibility. The inclusion criteria of this study are patients with RMS or combined  
28 122 valve disease aged more than 18 years who undergo cardiac valve replacement operation with  
29 123 or without tricuspid valve repair. Patients must also have systolic blood pressure (SBP)  $\geq$  100  
30 124 mmHg and diastolic blood pressure (DBP)  $\geq$  60 mmHg. The exclusion criteria of this study are  
31 125 patients with congenital heart disease, non mitral valve surgery, coronary artery bypass surgery  
32 126 or refusal to provide informed consent. Further exclusion criteria are adults aged 65 years or  
33 127 over, pregnant women, and patients with autoimmune disease, persistent hypotension (SBP <  
34 128 100 mmHg), severe aortic stenosis (aortic valve orifice < 0.75 cm<sup>2</sup>), chronic renal dysfunction  
35 129 with serum creatinine > 2.5 mg/dL, or known ACEI intolerance. Participants who meet the  
36 130 criteria and are willing to join the RamiRHeD trial will be informed in detail about the study  
37 131 and will be required to sign the informed consent.  
38 132

### 39 133 **Outcomes**

40 134 The primary outcomes of this study are the ST2 expression in mitral valve tissue and papillary  
41 135 muscle, and the secondary outcomes are soluble plasma ST2, clinical signs and symptoms that  
42 136 will be measured with the classification of NYHA (New York heart Failure Association),  
43 137 echocardiography results of: ejection fraction, TAPSE (Tricuspid Annular plane systolic  
44 138 excursion), End diastolic dimension, End systolic dimension, Mitral valve area, Mitral valve  
45 139 gradient, Tricuspid maximal velocity (V<sub>max</sub>), and Tricuspid regurgitation severity, as well as  
46  
47  
48  
49  
50  
51  
52  
53  
54  
55  
56  
57  
58  
59  
60

laboratory test results for NT-proBNP concentration. Study participants will be followed up for cardiac and all-cause mortality outcomes until 1 year after the surgery.

142

### 143 **Sample Size and Randomisation**

144 This is a pioneering study analysing the effects of 5 mg ramipril on ST2 expression in mitral valve tissue in humans. A previous study that used ST2 human tissue was conducted by Marzullo et al in 2016[12]. The used carotid tissue from carotid endarterectomy, with a sample size of 41 consecutive patients. Because our study will use human tissue samples, we approached the sample size calculation using the multistage non-finite population method, using this specified precision estimation formula[13]:  $N = (Z\delta)/E$ , with  $N$ = sample size;  $Z_{0.95}=1.96$ ;  $\delta N(0,1) = 1$ ; and  $E= 0.05$  for a 0.95 confidence interval. Therefore, we calculated a required sample of  $1.65(1)/0.05= 33$  samples.

152 According to the sample size of the previous study that analysed ST in human tissue and a sample size formula that is commonly used in *in vivo* studies, we decided to use a sample size of 30 for each arm, and with the addition of a drop out rate of 10%, this became total of 66 for the 2 arms.

156 The number includes a 10% dropout and withdrawal from each group. Randomisation will be done with an equal ratio of ramipril to placebo. A computerised sequence generator is used for randomisation. It will be linked with codes for placebo and treatment tablets provided by the manufacturer that was contracted to produce the trial medication. Researchers and participants will be blinded. After randomisation, the treatment pack and capsule will be identical between the two groups and will contain either active tablets or placebo. The principal investigator will have no access to the randomisation list.

163

### 164 **Research technique**

165 The mitral valve surgery (MVS) will be mitral valve replacement. Echocardiography will establish the diagnosis of rheumatic mitral valve disease. Rheumatic valve disease will be diagnosed with World Heart Federation Criteria (2012) for RHD[14]. The reference measurement for valve area is planimetry by two-dimensional echocardiography. The Doppler technique is used to assess the mean mitral gradient. Seller's classification on left ventriculography in a right anterior oblique view angle of 30° will be performed to evaluate the severity of mitral valve regurgitation. In cases of missing data, substitution measurements will be used as previously described: Doppler half time pressure for valve area and colour Doppler for mitral regurgitation.[14]

174 Patient classification and diagnosis of rheumatic mitral stenosis will be determined by qualified cardiologists, and the decision to perform mitral valve replacement surgery will be based on the consensus of the multidisciplinary team, consisting of cardiologists and cardiothoracic surgeons. Echocardiography will be performed by echocardiography-consultant cardiologists. Blood samples will be collected by trained nurses specialised in pathology clinic laboratory work. Biomedical analysts will be in charge of the analysis and collection of ST2 in plasma and mitral valves. Detailed interviews with the study participants will be done by a well-trained medical doctor. The data will come from questionnaires, laboratory tests, echocardiography, and biochemical tests. The study instruments will use the same technique, same tools, same brands, and same place for data collection from each study participant.



1  
2  
3 184 Pre-existing atrial fibrillation, left atrial size, concomitant rheumatic valve disease, NYHA  
4 185 class, and other clinical data and echocardiographic data will be documented before and after  
5 186 surgery and will be analysed by multivariate analysis.  
6  
7 187

### 8 188 **Intervention**

9  
10 189 Daily capsules containing 5 mg ramipril or placebo to be taken orally will be provided for the  
11 190 study participants. An initial dose of 2.5 mg of ramipril will be given to the patients in the  
12 191 intervention group. If there are no significant adverse effects documented in the first 2 weeks  
13 192 after the initial dose, 5 mg of ramipril will be given in the subsequent weeks until 5 days before  
14 193 mitral valve replacement surgery. Participants will remain under the care of the treating  
15 194 cardiologist team. The routine medications of each patient will be continued. Capsules  
16 195 containing 5 mg ramipril or placebo will be given for a minimum of 3 months, up until 5 days  
17 196 before the mitral valve replacement.  
18  
19 197

### 20 198 **Withdrawal and Drop out**

21  
22 199 Participants will be informed that they are able to withdraw from the study at any time and will  
23 200 sign a form stating this. They will be informed that this will not affect their clinical care. Basic  
24 201 clinical data and samples already collected will be included in the analyses in accordance with  
25 202 the consent obtained at trial entry. Drop-out criteria will be loss to follow-up, severe adverse  
26 203 events, and mortality due to any cause.  
27  
28 204

### 29 205 **Sample Collection and Measurements**

30  
31 206 Clinical signs and symptoms will be documented before and after the study. Blood samples  
32 207 will be collected twice: before the intervention and one day before the mitral valve surgery.  
33 208 The routine blood analysis will include haemoglobin, platelet count, leucocyte count,  
34 209 erythrocyte sedimentation rate (ESR), and C-reactive protein (CRP). Total cholesterol, random  
35 210 blood glucose, HbA1C, urea, creatinine, serum electrolytes, NTproBNP, and plasma ST2 will  
36 211 be determined. Echocardiography before the intervention and before surgery will be performed.  
37 212 Mitral valve tissue expression of ST2 will be measured by immunohistochemistry. Plasma ST2  
38 213 will be measured using an enzyme-linked immunoabsorbent assay (ELISA) kit with the human  
39 214 ST2/IL33R antibody (R&D Systems, catalogue number DST200). This assay uses the  
40 215 technique of the quantitative sandwich enzyme immunoassay. A monoclonal antibody specific  
41 216 for human ST2 is pre-coated onto a microplate. Standards and samples are pipetted into the  
42 217 wells, and any ST2 present is bound by the immobilised antibody. Unbound substances are  
43 218 washed away and then, an enzyme-linked polyclonal antibody specific for human ST2 is added  
44 219 to the wells. Following a wash to remove any unbound antibody-enzyme reagent, a substrate  
45 220 solution is added to the wells, and colour develops in proportion to the amount of ST2 bound  
46 221 in the initial step. After the colour development is stopped, the colour intensity is measured.  
47 222 Mitral valve and papillary muscle tissue will be collected during mitral valve replacement  
48 223 surgery and will be saved in a sterile container filled with 10% formalin. ST2 expression will  
49 224 be observed using immunohistochemistry (IHC). Cross-linking chemicals, such as  
50 225 paraformaldehyde and glutaraldehyde, will be used to preserve the cellular structure. The  
51 226 fixation begins when the tissue is harvested. Tissue blocking is performed afterwards by  
52 227 placing the tissue sample in hot parafilm, after which it is put into a mould until hard. Following



228 fixation, tissue sections are obtained using a microtome. Decloaking methods consisting of heat  
229 and pressure treatment, enzyme digestion, and microwaving are done afterwards. Following  
230 decloaking, the parafilm on the slides is removed by baking, and then the IHC staining process  
231 can be started. The primary antibody is a monoclonal ST2 antibody. The secondary antibody  
232 is conjugated by biotin. The blocking buffer includes BSA. The chromogen that will be used  
233 is 3,3'-diaminobenzidine (DAB). DAB oxidation is catalysed by horseradish peroxidase (HRP),  
234 after which it forms a brown precipitate, so ST2 expression can be visualised under a light  
235 microscope. The tissue will then be counterstained using haematoxylin-eosin staining, so the  
236 non-ST2-expressing cells can be visualised in bluish colour. A negative control will use  
237 haematoxylin-eosin staining only. Measurements of cells that express ST2 will be performed  
238 under a microscope. The date, tissue type, antibody dilution, tissue treatment, and  
239 magnification of the microscope will be documented. ST2-expressing cells will be counted by  
240 more than one professional.

241

### 242 **Statistical Analysis**

243 Continuous variables are expressed as mean±SD, and categorical variables are expressed as  
244 percentages. The  $\chi^2$  test will be used to see the relationship between dichotomous variables,  
245 and Student's t-test will be used for continuous variables. Single-variable correlation analysis  
246 and multivariable linear regression analysis will be performed. A P value <0.05 is considered  
247 statistically significant. The analyses will be performed with SPSS for Windows.

248

### 249 **Ethics and Dissemination**

250 The ethics of this study were approved by the ethics committee of National Cardiovascular  
251 Center Harapan Kita (NCCHK), Jakarta, Indonesia, with ethical code  
252 LB.02.01/VII/286/KEP.009/2018. This study has been registered at clinicaltrials.gov with the  
253 identifier code NCT03991910.

254

### 255 **DISCUSSION**

256 This study is planning to recruit rheumatic mitral valve patients to be randomised to obtain  
257 capsules containing either ramipril 5 mg or placebo. Rheumatic mitral stenosis is the main  
258 presentation of RHD that leads to significant morbidity and mortality. Recurrent or persistent  
259 valvulitis with bicommissural fusion usually leads to mitral stenosis. Previous studies suggest  
260 that RHD is an autoimmune disease that is associated with cytokine activities. Inflammatory  
261 cytokines are key regulators of immune processes.[4] Immunologic reactions caused by  
262 autoreactive antibodies continuously cause chronic inflammation and valvular fibrosis, which  
263 can be detected by an increase in sST2, an emerging biomarker for cardiac fibrosis.[10,15,16]

264 IL-33 is the natural ligand of ST2 and is highly expressed in smooth muscles and airway  
265 epithelia.[17] An inflammatory state stimulates the upregulation of ST2 by some cells, such as  
266 keratinocytes and dermal fibroblasts, and mechanical strain upregulates ST2 in cardiac  
267 fibroblasts.[17,18] The soluble ST2 isoform is increased under inflammatory conditions such  
268 as sepsis, allergic asthma, trauma, and pulmonary diseases.[19–22] Its elevation is also  
269 documented in some heart conditions, such as aortic stenosis and congestive cardiomyopathy,  
270 and this elevation is associated with the risk of heart failure and death.[23–27] In this study,

1  
2  
3 271 plasma ST2 is considered an inflammatory and fibrotic biomarker of rheumatic mitral stenosis.  
4 272 Because plasma ST2 can also increase in various conditions unrelated to cardiac fibrosis, this  
5 273 study also measures the ST2 expression in mitral valve tissue. Plasma ST2 describes the  
6 274 amount of ST2 in the circulation, whereas mitral valve cells that express ST2 describe the  
7 275 amount of transmembrane ST2.

8  
9  
10 276 ACEIs are commonly administered as the treatment of heart failure due to valvular  
11 277 regurgitation. Its use in MS is still debatable because of its hypotensive effect. A prior study  
12 278 assessing the safety of ACEIs in MS patients showed that the ACEI enalapril was well tolerated  
13 279 and safe up to a dose of 10 mg bid.[11] ACEIs are presumed to have vasodilatory effects in  
14 280 obstructive lesions and will decrease systemic vascular resistance through arterial  
15 281 vasodilatation, thus increasing the transvalvular gradient. Their anti-remodelling effect is also  
16 282 well established, and their long-term use has also been proven to improve left ventricular  
17 283 ejection fraction (LVEF) in patients with systolic dysfunction.[28] Because a prior study[11]  
18 284 demonstrated the efficacy and the potential benefits of ACEIs in improving outcomes in MS  
19 285 patients, this study aims to confirm and investigate the possible pathological mechanism of  
20 286 those improvements. This study will assess the effect of 5 mg ramipril as a cardiac antifibrosis  
21 287 treatment in severe MS RHD patients. Their plasma ST2 concentrations will be compared.  
22 288 Plasma ST2 concentration will also be compared before and after several months of consuming  
23 289 5 mg ramipril. There will be no healthy controls for this study because of ethical limitations in  
24 290 the acquisition of mitral valve tissue. Mitral valve tissue will be acquired during mitral valve  
25 291 surgery. The expression of ST2 in mitral valve tissue will then be calculated semi-  
26 292 quantitatively and compared with the plasma ST2 results. It is hypothesised that ramipril will  
27 293 suppress the expression of ST2 in the cardiac mitral valve in patients with RHD.

28  
29  
30 294 In addition to the plasma ST2 level and the ST2 expression in mitral valve tissue, this  
31 295 study also compares the pre-post effects of 5 mg ramipril versus placebo on NT-proBNP  
32 296 concentration echocardiography strain parameters and clinical outcomes. Clinical signs and  
33 297 symptoms and echocardiography parameters have been evaluated in some studies of mitral  
34 298 valve stenosis, and showed that these were positively correlated with the NT-proBNP  
35 299 concentration.[29,30] This study will also compare the NT-proBNP concentration between  
36 300 patients receiving ramipril and placebo. We will also calculate the correlation between the NT-  
37 301 proBNP concentration and the ST2 plasma concentration and mitral valve expression.

### 302 303 **Figure legends**

#### 304 **Figure 1** Hypothesis.

305 Molecular mimicry is a defense mechanism of group A streptococcus to avoid immune cells.  
306 This mechanism allows immune cells to generate autoimmunity against protein the lining of  
307 endothelial cells and causing chronic inflammation and valvular damage. Continuous process  
308 of chronic inflammation leads to valvular thickening and fibrosis, which is mediated by the  
309 Angiotensin II. Angiotensin II increase TGF- $\beta$  expression and cause IL-33 to bind with sST2,  
310 and subsequently cause damage and fibrosis to the valvular tissue evenmore, which later will  
311 ended with rheumatic heart failure. ACEI is hypothized to counteract these processes by  
312 decreasing Angiotensin II conversion from Angiotensin I.

#### 313 314 **Figure 2** Research Flowchart

315

**316 Authors contributions**

317 Conception and design of the work was initiated by AMA, BS, AS, BR, and BD. AMA, BD,  
318 ES, and FT contributed to the acquisition, analysis, and interpretation of data for the work. This  
319 manuscript was drafted by AMA, BD, and ES. AMA, PD, AW, and MJC critically revised the  
320 manuscript. The author and coauthors gave final approval and agree to be accountable for all  
321 aspects of the work and ensuring its integrity and accuracy.

322

**323 Funding**

324 This research received no specific grant from any funding agency in the public, commercial or  
325 not-for-profit sectors.

326

**327 Competing interests statement**

328 The authors declare that the research was conducted in the absence of any commercial or financial  
329 relationships that could be construed as a potential conflict of interest.

**330 Patient and Public Involvement statement**

331 Patients are not involved in the recruitment to and conduct of this study protocol.

332

**333 REFERENCES**

- 334 1 Rodriguez-Fernandez R, Amiya R, Wyber R, *et al.* Rheumatic heart disease among  
335 adults in a mining community of Papua, Indonesia: findings from an occupational  
336 cohort. *Heart Asia* 2015;**7**:1 LP – 5. doi:10.1136/heartasia-2015-010641
- 337 2 Ambari AM, Setianto B, Santoso A, *et al.* Survival analysis of patients with rheumatic  
338 MS after PBMV compared with MVS in a low-to-middle-income country. *Neth Heart*  
339 *J* 2019;**27**:559–64. doi:10.1007/s12471-019-01315-x
- 340 3 Sharma N, Toor D. Interleukin-10: Role in increasing susceptibility and pathogenesis of  
341 rheumatic fever/rheumatic heart disease. *Cytokine* 2017;**90**:169–76.  
342 doi:https://doi.org/10.1016/j.cyto.2016.11.010
- 343 4 Bilik MZ, Kaplan İ, Polat N, *et al.* Serum Levels of IL-17 and IL-23 in Patients With  
344 Rheumatic Mitral Stenosis. *Medicine (Baltimore)* 2016;**95**:e3562–e3562.  
345 doi:10.1097/MD.0000000000003562
- 346 5 Ramona J, von M, Martin F, *et al.* Soluble ST2 - A Potential Biomarker of Rheumatic  
347 Heart Disease. *Clin Med Rev Case Reports* 2019;**6**. doi:10.23937/2378-3656/1410255
- 348 6 Gardezi SKM, Coffey S, Prendergast BD, *et al.* Serum biomarkers in valvular heart  
349 disease. *Heart* 2018;**104**:349 LP – 358. doi:10.1136/heartjnl-2016-310482
- 350 7 L Januzzi J. ST2 as a Cardiovascular Risk Biomarker: From the Bench to the Bedside.  
351 *J Cardiovasc Transl Res* 2013;**6**. doi:10.1007/s12265-013-9459-y
- 352 8 Ayoub S, Ferrari G, Gorman RC, *et al.* Heart Valve Biomechanics and Underlying  
353 Mechanobiology. *Compr Physiol* 2016;**6**:1743–80. doi:10.1002/cphy.c150048
- 354 9 Hus-Citharel A, Bouby N, Iturrioz X, *et al.* Multiple Cross Talk between Angiotensin  
355 II, Bradykinin, and Insulin Signaling in the Cortical Thick Ascending Limb of Rat  
356 Kidney. *Endocrinology* 2010;**151**:3181–94. doi:10.1210/en.2009-1237
- 357 10 Ambari AM, Setianto B, Santoso A, *et al.* Angiotensin Converting Enzyme Inhibitors  
358 (ACEIs) Decrease the Progression of Cardiac Fibrosis in Rheumatic Heart Disease  
359 Through the Inhibition of IL-33/sST2. *Front Cardiovasc Med* 2020;**7**:115.  
360 doi:10.3389/fcvm.2020.00115

- 1  
2  
3 361 11 Chockalingam A, Sangareddi V, Dorairajan S, *et al.* Safety and Efficacy of Enalapril in  
4 362 Multivalvular Heart Disease with Significant Mitral Stenosis—SCOPE-MS. *Angiology*  
5 363 2005;**56**:151–8. doi:10.1177/000331970505600205  
6 364 12 Marzullo A, Ambrosi F, Inchingolo M, *et al.* ST2L transmembrane receptor expression:  
7 365 An immunochemical study on endarterectomy samples. *PLoS One* 2016;**11**:1–12.  
8 366 doi:10.1371/journal.pone.0156315  
9 367 13 Louangrath PI. Sample Size Determination for Non-Finite Population. *SSRN Electron J*  
10 368 2017;:1–12. doi:10.2139/ssrn.2710455  
11 369 14 Reményi B, Wilson N, Steer A, *et al.* World Heart Federation criteria for  
12 370 echocardiographic diagnosis of rheumatic heart disease-an evidence-based guideline.  
13 371 *Nat Rev Cardiol* 2012;**9**:297–309. doi:10.1038/nrcardio.2012.7  
14 372 15 Kakkar R, Lee RT. The IL-33/ST2 pathway: therapeutic target and novel biomarker. *Nat*  
15 373 *Rev Drug Discov* 2008;**7**:827–40. doi:10.1038/nrd2660  
16 374 16 Miller AM. Role of IL-33 in inflammation and disease. *J Inflamm (Lond)* 2011;**8**:22.  
17 375 doi:10.1186/1476-9255-8-22  
18 376 17 Schmitz J, Owyang A, Oldham E, *et al.* IL-33, an Interleukin-1-like Cytokine that  
19 377 Signals via the IL-1 Receptor-Related Protein ST2 and Induces T Helper Type 2-  
20 378 Associated Cytokines. *Immunity* 2005;**23**:479–90.  
21 379 doi:https://doi.org/10.1016/j.immuni.2005.09.015  
22 380 18 Sanada S, Hakuno D, Higgins L, *et al.* IL-33 and ST2 Comprise a Critical  
23 381 Biomechanically Induced and Cardioprotective Signaling System. *J Clin Invest*  
24 382 2007;**117**:1538–49. doi:10.1172/JCI30634  
25 383 19 Hayakawa H, Hayakawa M, Kume A, *et al.* Soluble ST2 Blocks Interleukin-33  
26 384 Signaling in Allergic Airway Inflammation. *J Biol Chem* 2007;**282**:26369–80.  
27 385 doi:10.1074/jbc.M704916200  
28 386 20 Martinez-Rumayor A, Camargo C, M Green S, *et al.* Soluble ST2 Plasma  
29 387 Concentrations Predict 1-Year Mortality in Acutely Dyspneic Emergency Department  
30 388 Patients With Pulmonary Disease. *Am J Clin Pathol* 2008;**130**:578–84.  
31 389 doi:10.1309/WMG2BFRC97MKKQKP  
32 390 21 Becerra A, Warke R, Xhaja K, *et al.* Increased activity of indoleamine 2,3-dioxygenase  
33 391 in serum from acutely infected dengue patients linked to gamma interferon antiviral  
34 392 function. *J Gen Virol* 2009;**90**:810–7. doi:10.1099/vir.0.004416-0  
35 393 22 Brunner M, Krenn C, Roth G, *et al.* Increased levels of soluble ST2 protein and IgG1  
36 394 production in patients with sepsis and trauma. *Intensive Care Med* 2004;**30**:1468–73.  
37 395 doi:10.1007/s00134-004-2184-x  
38 396 23 Bartunek J, Delrue L, Van Durme F, *et al.* Nonmyocardial Production of ST2 Protein in  
39 397 Human Hypertrophy and Failure Is Related to Diastolic Load. *J Am Coll Cardiol*  
40 398 2008;**52**:2166–74. doi:https://doi.org/10.1016/j.jacc.2008.09.027  
41 399 24 Szerafin T, Niederpold T, Mangold A, *et al.* Secretion of Soluble ST2-Possible  
42 400 Explanation for Systemic Immunosuppression after Heart Surgery. *Thorac Cardiovasc*  
43 401 *Surg* 2009;**57**:25–9. doi:10.1055/s-2008-1039044  
44 402 25 S Sabatine M, A Morrow D, Higgins L, *et al.* Complementary Roles for Biomarkers of  
45 403 Biomechanical Strain ST2 and N-Terminal Prohormone B-Type Natriuretic Peptide in  
46 404 Patients With ST-Elevation Myocardial Infarction. *Circulation* 2008;**117**:1936–44.  
47 405 doi:10.1161/CIRCULATIONAHA.107.728022  
48 406 26 Mueller T, Dieplinger B, Alfons G, *et al.* Increased Plasma Concentrations of Soluble  
49 407 ST2 are Predictive for 1-Year Mortality in Patients with Acute Destabilized Heart  
50 408 Failure. *Clin Chem* 2008;**54**:752–6. doi:10.1373/clinchem.2007.096560  
51 409 27 Shimpo M, A Morrow D, O Weinberg E, *et al.* Serum Levels of the Interleukin-1  
52 410 Receptor Family Member ST2 Predict Mortality and Clinical Outcome in Acute

- 1  
2  
3 411 Myocardial Infarction. *Circulation* 2004;**109**:2186–90.  
4 412 doi:10.1161/01.CIR.0000127958.21003.5A  
5 413 28 Jao G, Lystash J, Sane D. Angiotensin-Converting Enzyme Inhibitors Can Increase the  
6 414 Transvalvular Gradient Among Patients With Aortic Stenosis. *J Am Coll Cardiol*  
7 415 2012;**59**:777. doi:10.1016/j.jacc.2011.10.892  
8 416 29 Arat-Özkan M.D A, Yiğit M.D Z, Ökçün M.D B, *et al.* Serum N-Terminal pro-BNP  
9 417 Levels Correlate with Symptoms and Echocardiographic Findings in Patients with  
10 418 Mitral Stenosis. *Echocardiography* 2005;**22**:473–8. doi:10.1111/j.1540-  
11 419 8175.2005.04085.x  
12 420 30 İltumur K, Karabulut A, Yokus B, *et al.* N-terminal proBNP plasma levels correlate with  
13 421 severity of mitral stenosis. *J Heart Valve Dis* 2005;**14**:735–41.  
14 422  
15  
16  
17  
18  
19  
20  
21  
22  
23  
24  
25  
26  
27  
28  
29  
30  
31  
32  
33  
34  
35  
36  
37  
38  
39  
40  
41  
42  
43  
44  
45  
46  
47  
48  
49  
50  
51  
52  
53  
54  
55  
56  
57  
58  
59  
60



1  
2  
3  
4  
5  
6  
7  
8  
9  
10  
11  
12  
13  
14  
15  
16  
17  
18  
19  
20  
21  
22  
23  
24  
25  
26  
27  
28  
29  
30  
31  
32  
33  
34  
35  
36  
37  
38  
39  
40  
41  
42  
43  
44  
45  
46  
47  
48  
49  
50  
51  
52  
53  
54  
55  
56  
57  
58  
59  
60

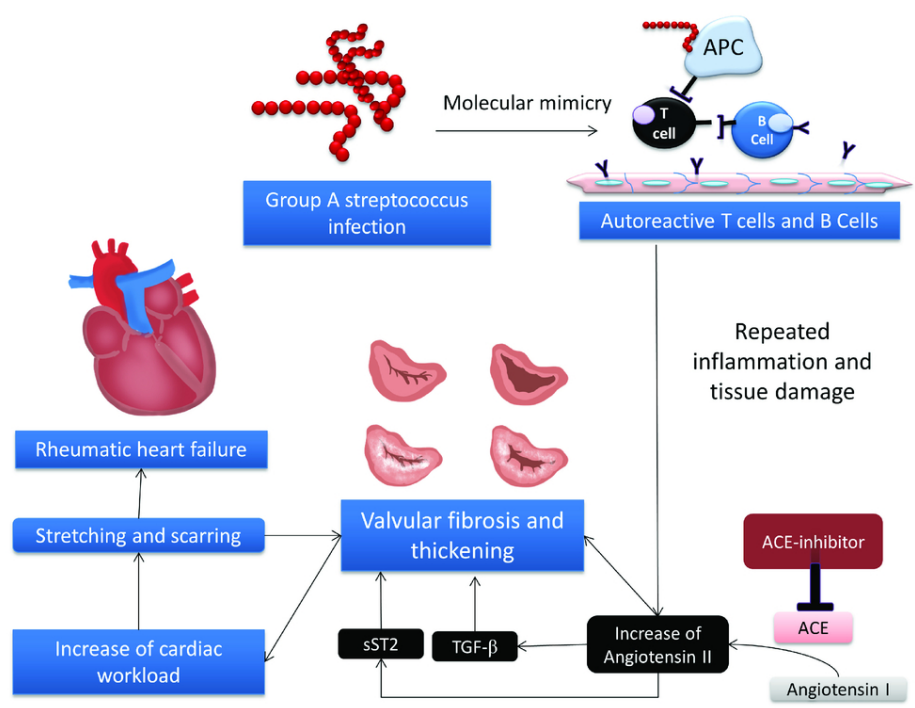

Figure 1 Hypothesis

90x90mm (300 x 300 DPI)

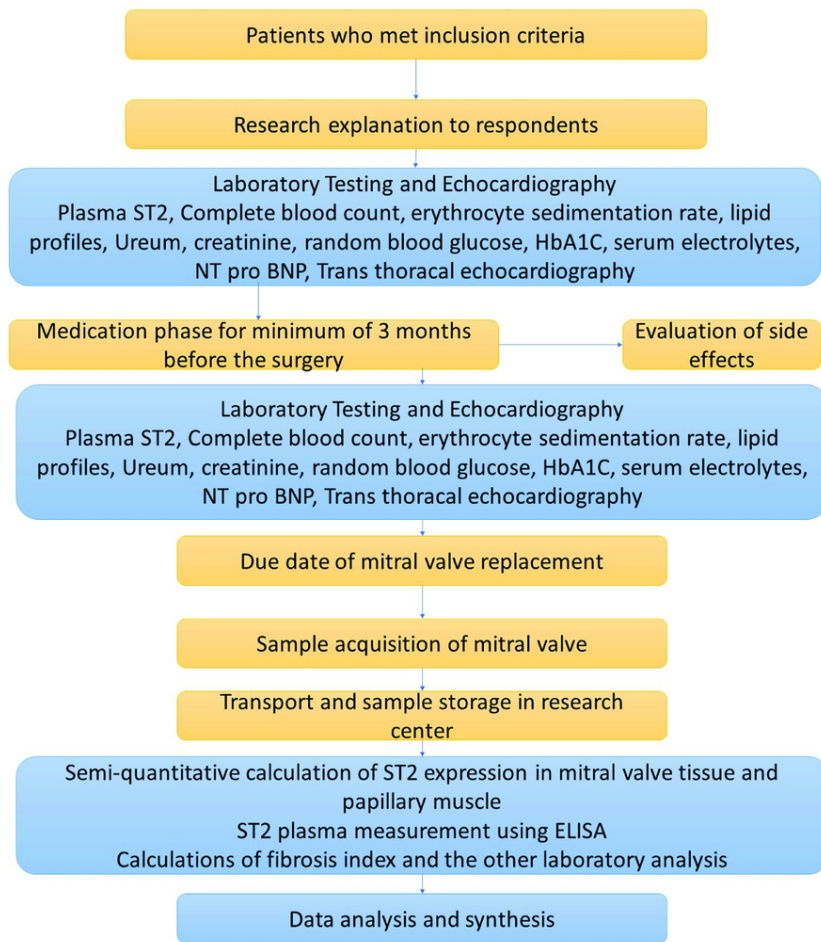

Figure 2 Research Flowchart

90x90mm (300 x 300 DPI)





SPIRIT 2013 Checklist: Recommended items to address in a clinical trial protocol and related documents\*

| Section/item                      | Item No | Description                                                                                                                                                                                                                     |
|-----------------------------------|---------|---------------------------------------------------------------------------------------------------------------------------------------------------------------------------------------------------------------------------------|
| <b>Administrative information</b> |         |                                                                                                                                                                                                                                 |
| Title                             | 1       | Descriptive title identifying the study design, population, interventions, and, if applicable, trial acronym<br>Randomised Controlled Trial into the role of ramipril in fibrosis reduction in RHD: The RamiRHeD trial protocol |
| Trial registration                | 2a      | Trial identifier and registry name. If not yet registered, name of intended registry<br>Clinicaltrials.gov NCT03991910                                                                                                          |

2b All items from the World Health Organization Trial Registration Data Set

|                          |                                                                                                                                              |
|--------------------------|----------------------------------------------------------------------------------------------------------------------------------------------|
| Register                 | ClinicalTrials.gov                                                                                                                           |
| Main ID                  | NCT03991910                                                                                                                                  |
| Protocol ID              | RamiRHeD                                                                                                                                     |
| Date of Registration     | 19/06/2019                                                                                                                                   |
| Prospective Registration | Yes                                                                                                                                          |
| Primary sponsor          | Harapan Kita National Cardiovascular Center/Indonesia University                                                                             |
| Public title             | The Effect of Ramipril in Suppressing ST2 Expression in Rheumatic Mitral Stenosis Patients                                                   |
| Scientific title         | The Effect of Ramipril in Suppressing Gene Expression of Fibrosis in Cardiac Mitral Stenosis in Patients With Rheumatic Heart Disease        |
| Date of first enrolment  | June 27, 2019                                                                                                                                |
| Target sample size       | 66                                                                                                                                           |
| Recruitment status       | Recruiting                                                                                                                                   |
| Study type               | Randomised clinical trial                                                                                                                    |
| Study design             | Allocation: Randomized. Intervention model: Parallel Assignment. Primary purpose: Treatment. Masking: Double (Participant, Investigator).    |
| Phase                    | Phase 3                                                                                                                                      |
| Countries of Recruitment | Indonesia                                                                                                                                    |
| Health condition         | ACE inhibitor<br>Fibrosis; heart<br>Mitral stenosis<br>Rheumatic heart disease<br>Rheumatic mitral stenosis                                  |
| Intervention (s)         | Drug: placebos<br>Drug: Ramipril 5 mg oral capsule                                                                                           |
| Primary outcome          | ST2 expression in mitral valve tissue                                                                                                        |
| Secondary outcome        | ST2 plasma level<br>NT-proBNP concentration (pg/ml)<br>Ejection fraction<br>TAPSE (tricuspid annular plane systolic excursion)<br>NYHA class |

Protocol version 3 Date and version identifier  
Released: 19-06-2019

Funding 4 Sources and types of financial, material, and other support  
No specific fundings outside our institution (Harapan Kita National Cardiovascular Center, Indonesia)

1  
2  
3  
4  
5  
6  
7  
8  
9  
10  
11  
12  
13  
14  
15  
16  
17  
18  
19  
20  
21  
22  
23  
24  
25  
26  
27  
28  
29  
30  
31  
32  
33  
34  
35  
36  
37  
38  
39  
40  
41  
42  
43  
44  
45  
46  
47  
48  
49  
50  
51  
52  
53  
54  
55  
56  
57  
58  
59  
60

**Roles and responsibilities**

- 5a Names, affiliations, and roles of protocol contributors**  
Ade M. Ambari • Budhi Setianto • Anwar Santoso • Basuni Radi • Bambang Dwiputra  
Department of Cardiology and Vascular Medicine Faculty of Medicine University of Indonesia, National Cardiovascular Center Harapan Kita, Jakarta, Indonesia
- Eliana Susilowati • Fadilla Tulrahmi  
Research Assistant Division of Preventive and Rehabilitative Cardiology, National Cardiovascular Centre Harapan Kita, Jakarta, Indonesia
- Maarten .J.M. Cramer • P.A. Doevendans • Annemiek Wind  
Department of Cardiology, University Medical Center Utrecht, Utrecht, The Netherlands
- Role:** Ade M. Ambari conceived the study. Ade M. Ambari, Pieter A. Doevendans, Maarten .J.M. Cramer, Budhi Setianto, Anwar Santoso, Basuni Radi, Bambang Dwiputra initiated the study design and conceptual framework. Ade M. Ambari, Bambang Dwiputra contribute in patients' recruitment and assessment, writing and editing. Eliana Susilowati contribute to the biomedical methods, sample collection, writing and editing. Fadilla Tulrahmi conducting the primary statistical analysis, randomisation, and sample size calculation. Ade M. Ambari, Pieter A. Doevendans, Maarten .J.M. Cramer, Annemiek Wind contribute to writing, protocol editing, language editing. All authors contributed to refinement of the study protocol and approved the final manuscript.
- 5b Name and contact information for the trial sponsor**  
Trial sponsor: Harapan Kita National Cardiovascular Center, Jakarta  
Contact name: Ade Meidian Ambari  
Address: S Parman Street number 87, Special Region of Jakarta, Indonesia  
Telephone: 0215681111  
Email: dr\_ade\_meidian@yahoo.co.id
- 5c Role of study sponsor and funders, if any, in study design; collection, management, analysis, and interpretation of data; writing of the report; and the decision to submit the report for publication, including whether they will have ultimate authority over any of these activities**  
This research received no specific grant from any funding agency in the public, commercial or not-for-profit sectors.
- 5d Composition, roles, and responsibilities of the coordinating centre, steering committee, endpoint adjudication committee, data management team, and other individuals or groups overseeing the trial, if applicable (see Item 21a for data monitoring committee)**

**Introduction****Principal Investigators**

Design and conduct of RCTRDMS  
Preparation of protocol and revisions  
Organising steering committee meetings  
Publication of study reports  
Members of TMC [*Trial Management Committee*]

**Steering committee (SC)**

Agreement of final protocol  
All lead investigators will be steering committee members  
Reviewing progress of study and if necessary agreeing changes to the protocol and/or investigators brochure to facilitate the smooth running of the study.

**Trial Management Committee (TMC)**

(Principle [*sic*] investigator, Research Physician, Administrator)

Study planning  
Organisation of steering committee meetings  
Provide annual risk report to ethics committee  
report serious adverse events (SAE) to medical committee and ethics committee  
Responsible for trial master file  
Budget administration and contractual issues with individual centres  
Advice for lead investigators  
Audit of 6 monthly feedback forms and decide when site visit to occur.  
Assistance with international review, board/independent ethics committee applications  
Data verification  
Randomisation  
Organisation of central serum sample collection

**Data Manager**

Maintenance of trial IT system and data entry  
Data verification

## Background and rationale

6a

Description of research question and justification for undertaking the trial, including summary of relevant studies (published and unpublished) examining benefits and harms for each intervention

Rheumatic heart disease (RHD) is a major burden in developing countries home to 80% of all people living with the disease where it causes most of the cardiovascular morbidity and mortality in children and young adults. Chronic inflammation and fibrosis of heart valve tissue due to chronic inflammation in RHD will cause calcification and thickening of the impacted heart valves, especially the mitral valve. This fibrogenesis is enhanced by the production of Angiotensin II by increasing TGF- $\beta$  expression and latter, the binding of IL-33 which is known to have anti-hyperthropic and anti-fibrotic effects to sST2. Its binding to the non-natural ligand of sST2 will worsen the fibrosis. Therefore, we hypothesized that Angiotensin-converting enzyme inhibitor (ACEI) will improve rheumatic mitral valve stenosis.

Existing knowledge: Angiotensin-converting enzyme inhibitors (ACEI) are first-line therapy in cardiac failure, and their symptomatic and survival benefits extend beyond afterload reduction. Reduction in fibrosis and anti-proliferative and neurohumoral effects contribute to the ACEI effect that is not reproduced by pure vasodilators. ACEI was well tolerated in symptomatic RHD associated with significant mitral stenosis and preserved left the ventricular systolic function. New therapies targeting ST 2 and their receptors as studied in some autoimmune diseases may promise a new approach for patients with RHD. We are assessing the effect of Ramipril in suppressing fibrotic protein expression in mitral valve (measured with ST2 expression) of patients with RHD in the National Cardiac Center Harapan Kita hospital Jakarta Indonesia.

Dose selection: Prevoious study (SCOPE trial) showed that ACEI (Enalapril) was well tolerated in symptomatic RHD associated with significant aortic and/or mitral stenosis and preserved left ventricular systolic function until dose of 10 mg bid. This study use Ramipril 5 mg as it is more commonly used in Indonesia.

Need for a trial: Current guidelines for valvular intervention do not include ACEI as therapy in rheumatic mitral stenosis patients. In developing countries, percutaneous balloon mitral valvuloplasty and mitral valve surgery are the therapeutic options for rheumatic mitral stenosis. Both of these treatments involve enormous expenses; it is the public health cost burden for developing countries. Valvular anti-inflammatory and anti-fibrosis medical therapy to suppress the progression of the disease is needed in rheumatic mitral stenosis patients.

|    |              |    |                                                                                  |
|----|--------------|----|----------------------------------------------------------------------------------|
| 1  |              |    |                                                                                  |
| 2  |              | 6b | Explanation for choice of comparators                                            |
| 3  |              |    | Current guidelines for valvular intervention do not include ACEI as therapy      |
| 4  |              |    | in rheumatic mitral stenosis patients. This study is divided in 2 arms. The      |
| 5  |              |    | first arm will be given Ramipril 5 mg as the intervention, while the second      |
| 6  |              |    | arm, will be given placebo as the comparator. The other individualized           |
| 7  |              |    | treatments for rheumatic valvular disease was still given in both arms as        |
| 8  |              |    | indicated.                                                                       |
| 9  |              |    |                                                                                  |
| 10 |              |    |                                                                                  |
| 11 | Objectives   | 7  | Specific objectives or hypotheses                                                |
| 12 |              |    | The investigators hypothesized that administration of Ramipril 5 mg for 3        |
| 13 |              |    | months will reduce expression of ST2 as fibrosis biomarkers, in the cardiac      |
| 14 |              |    | mitral valve of patients with Rheumatic Heart Disease with mitral stenosis.      |
| 15 |              |    |                                                                                  |
| 16 |              |    |                                                                                  |
| 17 | Trial design | 8  | Description of trial design including type of trial (eg, parallel group,         |
| 18 |              |    | crossover, factorial, single group), allocation ratio, and framework (eg,        |
| 19 |              |    | superiority, equivalence, noninferiority, exploratory)                           |
| 20 |              |    | This is a single-centre, double-blind, placebo-controlled, pre-post test design, |
| 21 |              |    | randomised clinical trial. Patients with mitral stenosis valvular dysfunction    |
| 22 |              |    | due to rheumatic process planned for cardiac valve replacement were given        |
| 23 |              |    | Ramipril 5 mg or placebo for minimum 12 weeks before the surgery. ST2            |
| 24 |              |    | was checked as fibrosis marker. This study will be conducted in the              |
| 25 |              |    | Department of Cardiology and Vascular Medicine, University Indonesia,            |
| 26 |              |    | National Cardiac Center Harapan Kita Hospital, Jakarta, Indonesia from           |
| 27 |              |    | June, 27th 2019.                                                                 |
| 28 |              |    |                                                                                  |
| 29 |              |    |                                                                                  |
| 30 |              |    |                                                                                  |
| 31 |              |    |                                                                                  |

### Methods: Participants, interventions, and outcomes

|    |                      |    |                                                                               |
|----|----------------------|----|-------------------------------------------------------------------------------|
| 32 |                      |    |                                                                               |
| 33 | Study setting        | 9  | Description of study settings (eg, community clinic, academic hospital)       |
| 34 |                      |    | and list of countries where data will be collected. Reference to where        |
| 35 |                      |    | list of study sites can be obtained                                           |
| 36 |                      |    | Study setting: in a national academic hospital. Patients come from various    |
| 37 |                      |    | regions in one country (Indonesia).                                           |
| 38 |                      |    |                                                                               |
| 39 |                      |    |                                                                               |
| 40 | Eligibility criteria | 10 | Inclusion and exclusion criteria for participants. If applicable, eligibility |
| 41 |                      |    | criteria for study centres and individuals who will perform the               |
| 42 |                      |    | interventions (eg, surgeons, psychotherapists)                                |
| 43 |                      |    | • Inclusion criteria of this study are: Patients with mitral valve stenosis   |
| 44 |                      |    | or a combination                                                              |
| 45 |                      |    | • aged more than 18 years                                                     |
| 46 |                      |    | • undergo cardiac valve replacement operation with or without a               |
| 47 |                      |    | tricuspid valve repair,                                                       |
| 48 |                      |    | • patients with systolic blood pressure (SBP) $\geq$ 100 mmHg and             |
| 49 |                      |    | diastolic blood pressure (DBP) $\geq$ 60 mmHg                                 |
| 50 |                      |    | • passed in medication phase without side effect minimum 4 weeks              |
| 51 |                      |    | until operation schedule                                                      |
| 52 |                      |    |                                                                               |
| 53 |                      |    |                                                                               |
| 54 |                      |    |                                                                               |
| 55 |                      |    |                                                                               |
| 56 |                      |    |                                                                               |
| 57 |                      |    |                                                                               |
| 58 |                      |    |                                                                               |
| 59 |                      |    |                                                                               |
| 60 |                      |    |                                                                               |

## Interventions

11a Interventions for each group with sufficient detail to allow replication, including how and when they will be administered

## Arms and Interventions

| Arms                                                                    | Interventions                                                                                                                                                                                       |
|-------------------------------------------------------------------------|-----------------------------------------------------------------------------------------------------------------------------------------------------------------------------------------------------|
| Placebo Comparator: control<br>control patients will be given a placebo | Drug: Placebos<br>the control group will be given placebo inside a capsule, so study participant won't be able to know the drug and doses inside the capsule (for masking)                          |
| Experimental: treatment<br>Ramipril 5 mg treatment group                | Drug: Ramipril 5Mg Oral Capsule<br>the treatment group will be given Ramipril 5 mg inside a capsule, so study participant won't be able to know the drug and doses inside the capsule (for masking) |

11b Criteria for discontinuing or modifying allocated interventions for a given trial participant (eg, drug dose change in response to harms, participant request, or improving/worsening disease)  
Participants will be informed that they are able to withdraw from the study at any time and will sign a reference as proof. They will be informed that this will not affect their clinical care. Basic clinical data and samples already collected will be included in the analyses in accord with the consent obtained at trial entry. Drop out criteria will be Participants who are lost to follow up, participants with severe adverse events, mortality due to any cause.

11c Strategies to improve adherence to intervention protocols, and any procedures for monitoring adherence (eg, drug tablet return, laboratory tests)  
Patients' adherence will be monitored with the drug return. Patients will be contacted via phone number to be reminded for routine administration. Patients are provided with the investigator contact if needed something to ask or to report adverse events or side effects (if any). Patients will be asked to visit the hospital where this study is enrolled to meet the investigator monthly. Each month, capsule return will be counted and patient will also be evaluated for the symptoms and vital signs.

11d Relevant concomitant care and interventions that are permitted or prohibited during the trial  
Rescue medication: stop the drug. Patient will be admitted to hospital and undergone treatments according to the adverse effects.  
Prohibited concomitant medication: Angiotensin receptor blocker.



- 1  
2  
3  
4  
5  
6  
7  
8  
9  
10  
11  
12  
13  
14  
15  
16  
17  
18  
19  
20  
21  
22  
23  
24  
25  
26  
27  
28  
29  
30  
31  
32  
33  
34  
35  
36  
37  
38  
39  
40  
41  
42  
43  
44  
45  
46  
47  
48  
49  
50  
51  
52  
53  
54  
55  
56  
57  
58  
59  
60
- Outcomes 12 Primary, secondary, and other outcomes, including the specific measurement variable (eg, systolic blood pressure), analysis metric (eg, change from baseline, final value, time to event), method of aggregation (eg, median, proportion), and time point for each outcome. Explanation of the clinical relevance of chosen efficacy and harm outcomes is strongly recommended
- Primary Outcome Measures :
- ST2 plasma level  
plasma level of ST2 measured by ELISA
- Secondary Outcome Measures :
- ST2 expression in mitral valve tissue  
expression of ST2 in mitral valve tissue, using immunohistochemistry method
  - NT-proBNP concentration (pg/ml)  
concentration of NT-proBNP, plasma markers for cardiac dysfunction.
  - ejection fraction  
echocardiography parameter
  - TAPSE (tricuspid annular plane systolic excursion)  
echocardiography parameter to asses right ventricular function
  - NYHA class  
related symptoms will be graded in class I to IV according to NYHA.

Participant  
timeline

13 Time schedule of enrolment, interventions (including any run-ins and washouts), assessments, and visits for participants. A schematic diagram is highly recommended (see Figure)

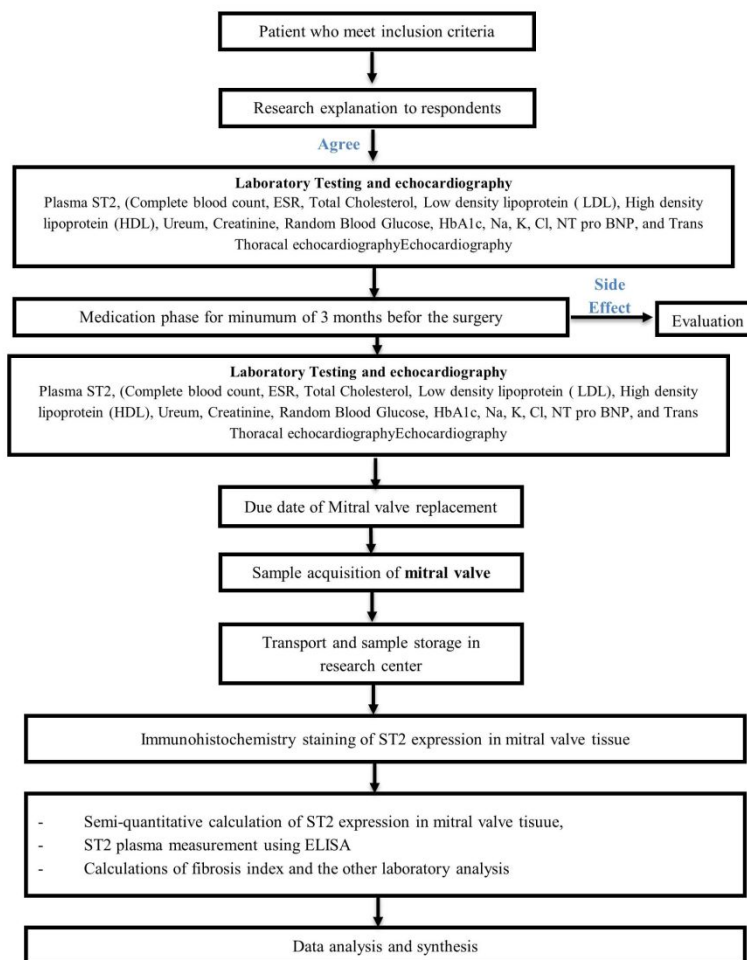

- 1  
2  
3  
4  
5  
6  
7  
8  
9  
10  
11  
12  
13  
14  
15  
16  
17  
18  
19  
20  
21  
22  
23  
24  
25  
26  
27  
28  
29  
30  
31  
32  
33  
34  
35
- Sample size 14 Estimated number of participants needed to achieve study objectives and how it was determined, including clinical and statistical assumptions supporting any sample size calculations
- This is a pioneer study for analysing effects of Ramipril 5 mg toward ST2 expression in mitral valve tissue in human. Previous study that use ST2 human tissue is a study from Marzullo et al in 2016[12] that use carotid tissue from carotid endarterectomy, with sample size of 41 consecutive patients. Because our study will use human tissue sample, we approached the sample size calculation using multistage non-finite population method, using this specified precision estimation formula[13]:  $N = (Z\delta)/E$ , with  $N$ = sample size;  $Z_{0.95} = 1.96$ ;  $\delta N(0,1) = 1$ ; and  $E = 0.05$  for 0.95 confidence interval. So we calculate the sample and found that  $1.65(1)/0.05 = 33$  samples.
- According to the sample size of the previous study that analyse ST in human tissue and a sample size formula that commonly used in in-vivo study, we decide to use a sample size of 30 for each arm, and with the addition of drop out rate of 10%, become total of 66 for 2 arms.
- The number includes a 10% dropout and withdrawal in each group. Randomisation will be done in an equal ratio of Ramipril to placebo. An online, web-based sequence generator system will be used. It will be linked with codes for placebo and treatment tablets provided by the manufacturer contracted to produce the trial medication. Researchers and participants will be blinded. After randomisation, the treatment pack and capsule are identical between both groups will contain either active tablets or placebo. The principal investigator will have no access to the randomisation list.
- 36  
37  
38  
39  
40  
41  
42  
43  
44  
45
- Recruitment 15 Strategies for achieving adequate participant enrolment to reach target sample size
- Patient recruitment will involve several cardiologists and cardiothoracic surgeons. All cardiologists and cardiothoracic surgeons in the hospital will be informed about this study, and to inform back if their patient suffered from Mitral valve stenosis. Technical meetings will be held and the professionals related to this study will be invited.

#### Methods: Assignment of interventions (for controlled trials)

Allocation:

46  
47  
48  
49  
50  
51  
52  
53  
54  
55  
56  
57  
58  
59  
60

- 1  
2  
3  
4  
5  
6  
7  
8  
9  
10  
11  
12  
13  
14  
15  
16  
17  
18  
19
- Sequence generation 16a Method of generating the allocation sequence (eg, computer-generated random numbers), and list of any factors for stratification. To reduce predictability of a random sequence, details of any planned restriction (eg, blocking) should be provided in a separate document that is unavailable to those who enrol participants or assign interventions
- Randomisation will be done in an equal ratio of Ramipril to placebo. An online, web-based sequence generator system will be used. It will be linked with codes for placebo and treatment tablets provided by the manufacturer contracted to produce the trial medication. Researchers and participants will be blinded. After randomisation, the treatment pack and capsule are identical between both groups will contain either active tablets or placebo. The principal investigator will have no access to the randomisation list.
- 20  
21  
22  
23  
24  
25  
26  
27  
28  
29  
30  
31  
32  
33  
34  
35
- Allocation concealment mechanism 16b Mechanism of implementing the allocation sequence (eg, central telephone; sequentially numbered, opaque, sealed envelopes), describing any steps to conceal the sequence until interventions are assigned
- Randomisation will be done in an equal ratio of Ramipril to placebo. An online, web-based sequence generator system will be used. It will be linked with codes for placebo and treatment tablets provided by the manufacturer contracted to produce the trial medication. Researchers and participants will be blinded. After randomisation, the treatment pack and capsule are identical between both groups will contain either active tablets or placebo. The principal investigator will have no access to the randomisation list.
- 36  
37  
38  
39  
40  
41  
42
- Implementation 16c Who will generate the allocation sequence, who will enrol participants, and who will assign participants to interventions
- Allocation sequence generation are from online, web-based sequence generator system. Participants will be enrolled with staff member responsible for patients enrollment.
- 43  
44  
45  
46  
47  
48  
49  
50  
51
- Blinding (masking) 17a Who will be blinded after assignment to interventions (eg, trial participants, care providers, outcome assessors, data analysts), and how
- Trial participants, investigators, analysts, care providers, will be blinded. Reserach assisstants whose role are to follow-up, evaluate and monitor the patients condition will not be blinded, so the drug could be stopped easily if there is any adverse effect from the treatment group.
- 52  
53  
54  
55  
56  
57  
58  
59  
60
- 17b If blinded, circumstances under which unblinding is permissible, and procedure for revealing a participant's allocated intervention during the trial
- Under the circumstances where actual treatment is absolutely necessary for further management of the patient, unblinding is permissible.

## Methods: Data collection, management, and analysis

- 1  
2  
3  
4  
5  
6  
7  
8  
9  
10  
11  
12  
13  
14  
15  
16  
17  
18  
19  
20  
21  
22  
23  
24  
25  
26  
27  
28  
29  
30  
31  
32  
33  
34  
35  
36  
37  
38  
39  
40  
41  
42  
43  
44  
45  
46  
47  
48  
49  
50  
51  
52  
53  
54  
55  
56  
57  
58  
59  
60
- Data collection methods
- 18a Plans for assessment and collection of outcome, baseline, and other trial data, including any related processes to promote data quality (eg, duplicate measurements, training of assessors) and a description of study instruments (eg, questionnaires, laboratory tests) along with their reliability and validity, if known. Reference to where data collection forms can be found, if not in the protocol
- Data collections will involve professional in each filed of data collection. For example: patients will be diagnosed with experienced cardiologists, surgery desicion based on the decision of a multidisciplinary team, echocardiography will be performed by the cardiologist who is specialized in echocardiography. Blood samples will be drawn by the experienced nurses in pathology clinic laboratory, ST2 plasma and tissue will be collected with the biomedical anlalysts, interview of study participants will be done by the trained assessors which. Study instruments involve questionnaires, laboratory tests, echocardiography, and biochemical tests. Study instruments will use same technique, same tools, same brands, and same place for data collection of each study participant.
- 18b Plans to promote participant retention and complete follow-up, including list of any outcome data to be collected for participants who discontinue or deviate from intervention protocols
- Participants will be informed that they are able to withdraw from the study at any time and will sign a reference as proof. They will be informed that this will not affect their clinical care. Basic clinical data and samples already collected will be included in the analyses in accord with the consent obtained at trial entry.
- Data management
- 19 Plans for data entry, coding, security, and storage, including any related processes to promote data quality (eg, double data entry; range checks for data values). Reference to where details of data management procedures can be found, if not in the protocol
- Participant files will be stored in numerical order and stored in a secure and accessible place and manner. Participants data will be copied in softfile and have back-up data.

Statistical  
methods

20a Statistical methods for analysing primary and secondary outcomes.  
Reference to where other details of the statistical analysis plan can be  
found, if not in the protocol

| Variable/Outcome                         | Hypothesis                                                                               | Outcome Measure                                                                                                            | Methods of Analysis                  |
|------------------------------------------|------------------------------------------------------------------------------------------|----------------------------------------------------------------------------------------------------------------------------|--------------------------------------|
| <b>1) <u>Primary</u></b>                 | Participants adherence of Ramipril 5 mg for 3-6 months or placebo 3-6 months will be 80% | Remaining drug in the participants is not more than 20% of the study drug given, to evaluate the adherence.                | Manual counting, univariate analysis |
| a) ST2 expression in mitral valve tissue | Reduction occur                                                                          | Mitral valve tissue ST2 measured using percentage of-cell-expressing ST2 using immunohistochemistry method                 | T-test                               |
| <b>2) <u>Secondary</u></b>               |                                                                                          |                                                                                                                            |                                      |
| a) ST2 plasma level                      | Reduction occur                                                                          | Plasma ST2 concentration will be measured with the concentration calculated according to the absorbance in ELISA technique | T-test                               |
| b) NT-proBNP concentration               | Reduction occur                                                                          | NT-proBNP concentration is measured in clinical pathology laboratory using ELISA.                                          | T-test                               |
| c) Ejection fraction(EF) and TAPSE       | Improvement occur                                                                        | Measure was performed using same echocardiography pre and post test, documented in percentage.                             | T-test                               |
| d) NYHA class                            | Reduction occur                                                                          | NYHA class will be measured according to the clinical signs and symptoms classified in NYHA                                | Chi-square test                      |

1  
2  
3  
4  
5  
6  
7  
8  
9  
10  
11  
12  
13  
14  
15  
16  
17  
18  
19  
20  
21  
22  
23  
24  
25  
26  
27  
28  
29  
30  
31  
32  
33  
34  
35  
36  
37  
38  
39  
40  
41  
42  
43  
44  
45  
46  
47  
48  
49  
50  
51  
52  
53  
54  
55  
56  
57  
58  
59  
60

20b Methods for any additional analyses (eg, subgroup and adjusted analyses)  
Continuous variables were expressed as mean±SD and categorical variables as percentages. The  $\chi^2$  test was used to see the relationship between dichotomous variables and the Student t-test for continuous variables. Single variable correlation analysis and multivariable linear regression analysis will be performed. A P value <0.05 was considered statistically significant. The analyses were performed with the use of SPSS for Windows.

20c Definition of analysis population relating to protocol non-adherence (eg, as randomised analysis), and any statistical methods to handle missing data (eg, multiple imputation)  
This study will be analysed in per-protocol fashion. Handling missing data will use multiple imputation method. Analysis of the primary endpoint will be based on a log-rank test and, therefore, not affected by patient withdrawals (as they will be censored) provided that dropping out is unrelated to prognosis. The effect that any missing data might have on results will be assessed via sensitivity analysis of augmented data sets. Dropouts (essentially, participants who withdraw consent for continued follow-up) will be included in the analysis by modern imputation methods for missing data. After the imputations are completed, all of the data (complete and imputed) will be combined and the analysis performed for each imputed-and-completed dataset. Rubin's method of multiple imputation will be used to estimate treatment effect.

## Methods: Monitoring

Data monitoring 21a Composition of data monitoring committee (DMC); summary of its role and reporting structure; statement of whether it is independent from the sponsor and competing interests; and reference to where further details about its charter can be found, if not in the protocol. Alternatively, an explanation of why a DMC is not needed  
A Data Monitoring Committee (DMC) has been established. The DMC is independent of the study sponsor. During the period of recruitment to the study, interim analyses will be supplied, in strict confidence, to the DMC, together with any other analyses that the committee may request.

21b Description of any interim analyses and stopping guidelines, including who will have access to these interim results and make the final decision to terminate the trial  
An interim-analysis is performed on the primary endpoint when 80% of patients have been randomised and mitral valves have been obtained. The interim-analysis is performed by a statistician in this study member. Stopping decision (if needed) based on the decision of the primary investigators and will be reported to the ethics committee.



1  
2 Harms 22 Plans for collecting, assessing, reporting, and managing solicited and  
3 spontaneously reported adverse events and other unintended effects  
4 of trial interventions or trial conduct  
5 Adverse events that happen before the patient started to receive study  
6 intervention will not be reported as it is not related to the study drug. All  
7 adverse events occurring after the patient receiving study intervention until  
8 the end of the study will be recorded. Serious adverse event (SAE) related to  
9 this study treatment will be reported to the institutional review board and  
10 ethical committee. Serious adverse event including: life-threatening condition  
11 with immediate risk of death, severe or permanent disability, prolonged  
12 hospitalisation, or a significant hazard determined by the data safety  
13 monitoring board. SAE that is believed by the investigator and medical  
14 committee to be causally related to the study drug will be reported. SAE  
15 occurring a month after the subject is discontinued from the study will not be  
16 reported unless the investigators believed that the event have been caused by  
17 the study drug. The causal effects will be determined according to the  
18 temporal relationship, clinical course, previous medical conditions and  
19 concomitant medications.  
20  
21  
22  
23  
24  
25

26 Auditing 23 Frequency and procedures for auditing trial conduct, if any, and  
27 whether the process will be independent from investigators and the  
28 sponsor  
29 Ethic committee will audit the trial conduct  
30  
31

### 32 Ethics and dissemination

33  
34 Research ethics 24 Plans for seeking research ethics committee/institutional review board  
35 approval (REC/IRB) approval  
36 This protocol and the template informed consent forms contained in  
37 Appendix I has been reviewed and approved by the IRBs/ECs [*institutional*  
38 *review boards/ethical committees*] with respect to scientific content and  
39 compliance with applicable research and human subjects regulations.  
40 The protocol, site-specific informed consent forms is in local language.  
41 Participant education and recruitment materials, and other requested  
42 documents and any subsequent modifications also will be reviewed and  
43 approved by the ethical review bodies (IRBs/ECs).  
44  
45  
46  
47  
48  
49  
50  
51  
52  
53  
54  
55  
56  
57  
58  
59  
60

- 1  
2  
3  
4  
5  
6  
7  
8  
9  
10  
11  
12  
13  
14  
15  
16  
17  
18  
19  
20  
21  
22  
23  
24  
25  
26  
27  
28  
29  
30  
31  
32  
33  
34  
35  
36  
37  
38  
39  
40  
41  
42  
43  
44  
45  
46  
47  
48  
49  
50  
51  
52  
53  
54  
55  
56  
57  
58  
59  
60
- Protocol amendments 25 Plans for communicating important protocol modifications (eg, changes to eligibility criteria, outcomes, analyses) to relevant parties (eg, investigators, REC/IRBs, trial participants, trial registries, journals, regulators)  
Any modifications to the protocol which may impact on the conduct of the study, potential benefit of the patient or may affect patient safety, including changes of study objectives, study design, patient population, sample sizes, study procedures, or significant administrative aspects will require a formal amendment to the protocol. If such amendment happens, it will request an approval of the Ethics Committee/IRB [*institutional review board*] prior to implementation.
- Consent or assent 26a Who will obtain informed consent or assent from potential trial participants or authorised surrogates, and how (see Item 32)  
The member of investigators will explain and obtain informed consent.
- 26b Additional consent provisions for collection and use of participant data and biological specimens in ancillary studies, if applicable  
Additional biological samples will be obtained to be stored for use in future studies. It will be stored in research center inside this hospital with adequate and certified samples handling. A materials consent will be obtained to the collection of the plasma specimens.
- Confidentiality 27 How personal information about potential and enrolled participants will be collected, shared, and maintained in order to protect confidentiality before, during, and after the trial  
All study-related information will be stored securely in the principal investigator's locker with limited access. All participants data will be identified by a coded ID number to maintain the confidentiality. Laboratory specimens will be stored in research center with a safe storage and will be identified also with coded ID. Local database will be secured with password access systems and the access will be limited.
- Declaration of interests 28 Financial and other competing interests for principal investigators for the overall trial and each study site  
All of the investigators disclose no conflict of interests.
- Access to data 29 Statement of who will have access to the final trial dataset, and disclosure of contractual agreements that limit such access for investigators  
Data management coordinating team will oversee the intra-study data sharing process. All principal investigators will be given access to the cleaned datasets. Principal investigators will have direct access to their own data sets and will have access to other sites data by request. To ensure confidentiality, data dispersed to project team members will be blinded of any identifying participant information.

- 1  
2 Ancillary and 30 Provisions, if any, for ancillary and post-trial care, and for  
3 post-trial care compensation to those who suffer harm from trial participation  
4 Study participants are covered by compensation for negligent harm through  
5 the standard of this hospital. This will include cover for additional health  
6 care, if it has causal relationship with the study drug.  
7
- 8  
9 Dissemination 31a Plans for investigators and sponsor to communicate trial results to  
10 policy participants, healthcare professionals, the public, and other relevant  
11 groups (eg, via publication, reporting in results databases, or other  
12 data sharing arrangements), including any publication restrictions  
13 Investigators is not expected to report the data as individual report. All  
14 presentations and publications are expected to protect the integrity of the  
15 major objectives of the study; data that break the blind will not be presented  
16 prior to the release of the main results. Recommendation as to the timing of  
17 presentation of endpoint data which they might be presented will be given by  
18 the steering committee. Each paper abstract must be submitted to the  
19 appropriate subcommittee for review of its appropriateness and scientific  
20 merit prior to submission, the subcommittee may recomend changes to the  
21 authors and submit its recommendations to be approved by the steering  
22 committee. Publications of papers to workshops, symposia, volumes etc will  
23 be in the right of the principal investigators, and principal investigators could  
24 appoint and give permission for the other investigators or other party to  
25 present this paper. the study results will be released to the participating  
26 physicians, patients, and general medical community.  
27  
28  
29  
30  
31  
32  
33 31b Authorship eligibility guidelines and any intended use of professional  
34 writers  
35 Topics suggested for presentation or publication will be circulated to the PIs  
36 [*Principal investigators*] of the CCCs [*Core Coordinating Centers*], the DCC  
37 [*Data Coordinating Center*], and research center in hospital. These groups  
38 are requested to suggest and justify names for authors to be reviewed by the  
39 PC [*Publications Committee*].  
40  
41  
42 31c Plans, if any, for granting public access to the full protocol, participant-  
43 level dataset, and statistical code  
44 Data sharing statement: no later than 5 years after the collection of the 1-year  
45 post randomisation interviews, we will deliver a completely deidentified data  
46 set to an appropriate data archive for sharing purposes.  
47  
48  
49

## 50 Appendices

51  
52  
53  
54  
55  
56  
57  
58  
59  
60

1  
2 Informed consent 32 Model consent form and other related documentation given to  
3 materials participants and authorised surrogates  
4  
5  
6  
7

RAHASIA 1

## Lembar Informasi dan Persetujuan Pasien

**Judul Penelitian :**  
**The Effect of Ramipril in Suppressing Gene Expression of Fibrosis in Left Atrial Appendage in Cardiac Mitral Stenosis Rheumatic Heart Disease Patients**

**Latar Belakang dan Tujuan Penelitian**

Penyakit jantung rematik merupakan beban penyakit utama di negara berkembang yang hampir 80% seluruh orang hidup dengan penyakit ini, dimana sebagai penyebab tingginya angka kematian dan kesakitan kardiovaskular pada anak dan remaja. Berdasarkan *Global Burden of Disease Study* (2010), jumlah pasien yang mengalami disabilitas karena penyakit jantung rematik sebanyak 10,1 juta per tahun di seluruh dunia.<sup>1</sup> *Rheumatic Mitral Valve Stenosis* (RMS) merupakan indikator utama penyakit jantung rematik yang dapat berdampak signifikan pada kematian dan kesakitan.

ST2 merupakan bagian reseptor IL-1 yang terdiri dari 2 bentuk, *a trans-membrane receptor* (ST2L) dan *soluble decoy receptor* (sST2).<sup>4</sup> Keduanya diinduksi di *cardiomyocytes* dan *fibroblast* yang terpapar tekanan biomekanik. Fungsi dari ST2 pada penyakit kardiovaskular, IL-33 telah terbukti memiliki efek anti-hipertrofik dan anti-fibrotik pada jantung, ditransduksi oleh ST2L.<sup>4</sup>

*Angiotensin-Converting Enzyme Inhibitors* (ACEI) sering digunakan untuk mencegah dan mengobati gagal jantung karena penyakit katup regurgitasi. Mayoritas pasien dengan penyakit jantung rematik simptomatik (RHD) memiliki mitral stenosis (MS) yang signifikan dan menolak terapi ACEI, hal ini disebabkan karena ditakutkan adanya hipotensi di kemudian hari dengan adanya obstruksi tetap.<sup>5</sup> ACEI pula dapat ditoleransi pada penyakit jantung rematik simptomatik berkaitan dengan mitral stenosis yang signifikan dan tetap mempertahankan fungsi sistolik ventrikel kiri.<sup>5</sup>

Efikasi pencegahan sekunder terbatas dalam mencegah progresivitas penyakit jantung rematik sehingga diperlukan adanya strategi dan terapi yang dibutuhkan untuk mencegah hal tersebut.<sup>3</sup> Terapi terbaru menargetkan ST2 dan reseptor seperti yang diteliti pada penyakit autoimun memungkinkan adanya pendekatan baru untuk pasien penyakit jantung rematik. ACEI merupakan agen dengan efek anti fibrosis. Oleh karena itu, peneliti ingin mengetahui efek Ramipril dalam memodulasi ekspresi gen fibrosis pada



## Lembar Informasi dan Persetujuan Pasien

RAHASIA 2

jaringan katup dan appendix atrium kiri pasien dengan penyakit jantung rematik di RS Jantung dan Pembuluh Darah Harapan Kita.

## Penjelasan tentang Prosedur Pelaksanaan

Pasien dengan penyakit jantung rematik mitral stenosis yang akan dilakukan tindakan MVR/r akan diberikan Ramipril atau Placebo selama minimal 3 bulan dan maksimal 6 bulan yang akan dikonsumsi setiap hari sampai waktu untuk dilakukannya tindakan operasi.

## Partisipasi sukarela/pengunduran diri

Partisipasi anda dalam penelitian ini bersifat sukarela, anda dapat menolak untuk berpartisipasi. Jika anda memutuskan untuk berpartisipasi, maka anda akan diberi lembar informasi ini untuk dipelajari isi dan tujuan penelitian. Anda dapat menyimpan lembar informasi ini dan anda akan diminta untuk mengisi dan menandatangani formulir persetujuan ini.

Anda dapat mengundurkan diri di awal saat anda membaca informasi dari penelitian ini dan tidak menyetujui untuk mengikuti penelitian tanpa harus memberikan alasan. Pengunduran diri anda tidak menimbulkan sanksi apapun dan anda tidak akan kehilangan manfaat yang akan menjadi hak anda.

## Manfaat partisipasi

Secara pribadi anda dapat mengambil manfaat berpartisipasi dalam penelitian ini karena dapat membantu mengurangi gejala dan tanda penyakit jantung katup mitral rematik. Anda juga dapat memberikan manfaat bagi orang lain dalam pengembangan ilmu pengetahuan dan peningkatan kesehatan masyarakat secara luas.

## Resiko dan Ketidaknyamanan

Konsekuensi dari partisipasi ini mengharuskan anda untuk minum obat maksimal selama 6 bulan setiap hari sebelum dilakukannya tindakan MVR/r. Partisipan akan melakukan pengambilan obat setiap bulannya ke tempat penelitian. Selain itu juga akan menjalani beberapa pemeriksaan penunjang medis seperti echocardiography dan

## Lembar Informasi dan Persetujuan Pasien

pengambilan darah yang akan dilakukan sebelum fase minum obat, dan setelah selesai minum obat.

## Kerahasiaan

Semua data pada penelitian ini akan diambil tanpa memberikan identitas anda. Kerahasiaan data dan identitas Anda dilindungi oleh hukum dan atau peraturan yang berlaku, dan tidak akan diberitakan secara umum. Pada saat hasil diumumkan, identitas Anda akan tetap terjaga kerahasiaannya.

Hanya pihak yang terlibat dalam penelitian ini saja yang akan diberikan wewenang untuk dapat memperoleh dan mengetahui keadaan kesehatan Anda, termasuk didalamnya dokter Anda dan perawat, rumah sakit, pihak sponsor dan perwakilannya, dan atau anggota dari Komisi Etik. Anda mempunyai hak untuk mendapatkan segala informasi yang berhubungan dengan keikutsertaan Anda dalam penelitian ini.

## Persetujuan Komite Etik Kedokteran

Penelitian ini diteliti dan disetujui oleh Komisi Etik Pusat Jantung Nasional Harapan Kita.

## Biaya

Partisipan yang mengikuti penelitian ini akan diberikan biaya perjalanan/transportasi dari rumah ke tempat penelitian sebesar Rp. 100.000,- pada setiap bulan selama masa konsumsi obat. Biaya penelitian ditanggung oleh peneliti yang termasuk dalam paket penelitian.

## Lain-lain

Jika anda merasa tidak nyaman, anda dapat memilih untuk tidak ikut serta dalam penelitian. Hal ini tidak akan mempengaruhi pelayanan rumah sakit terhadap anda di masa mendatang

RAHASIA 4

## Lembar Informasi dan Persetujuan Pasien

## Penawaran untuk Menjawab Pertanyaan

Jika Anda mempunyai pertanyaan-pertanyaan mengenai studi ini, Anda dapat menghubungi:

dr. Ade Meidian Ambari, SpJPK

No. telepon. 021 – 568 4085 ext 2209

Silahkan untuk tidak mendatangi formulir ini jika anda tidak mempunyai kesempatan untuk bertanya atau tidak menerima jawaban-jawaban yang memuaskan terhadap pertanyaan-pertanyaan anda.

## Pernyataan Persetujuan

Dengan menandatangani formulir ini, saya menyetujui bahwa penelitian ini telah dijelaskan kepada saya dan semua pertanyaan saya telah dijawab dengan memuaskan. Saya juga mempunyai hak untuk dapat mengundurkan diri dari penelitian ini setiap saat. Dengan pengertian tersebut, saya dengan sukarela ikut serta dalam penelitian ini. Saya mengerti bahwa formulir ini akan disimpan bersama dengan data kesehatan saya dan saya akan mendapatkan *copy* dari formulir ini.

|                         |                         |
|-------------------------|-------------------------|
| Nama Pasien : _____     | Nama Wali : _____       |
| Tanda tangan : _____    | Tanda tangan : _____    |
| Tanggal : ___/___/_____ | Tanggal : ___/___/_____ |

|                               |
|-------------------------------|
| Nama Dokter / Asisten : _____ |
| Tanda tangan : _____          |
| Tanggal : ___/___/_____       |

1  
2 Biological specimens 33 Plans for collection, laboratory evaluation, and storage of  
3 biological specimens for genetic or molecular analysis in the  
4 current trial and for future use in ancillary studies, if applicable  
5 Plasma specimens will be stored in biobank inside the research center  
6 in this hospital, and has been approved by the medical and ethical  
7 committee for the possible further researches.  
8  
9

---

11 \*It is strongly recommended that this checklist be read in conjunction with the SPIRIT 2013  
12 Explanation & Elaboration for important clarification on the items. Amendments to the  
13 protocol should be tracked and dated. The SPIRIT checklist is copyrighted by the SPIRIT  
14 Group under the Creative Commons "[Attribution-NonCommercial-NoDerivs 3.0 Unported](#)"  
15 license.  
16  
17  
18  
19  
20  
21  
22  
23  
24  
25  
26  
27  
28  
29  
30  
31  
32  
33  
34  
35  
36  
37  
38  
39  
40  
41  
42  
43  
44  
45  
46  
47  
48  
49  
50  
51  
52  
53  
54  
55  
56  
57  
58  
59  
60
